# Supplementary material
Source: publisher figshare collection journal article supplement (https://gsapubs.figshare.com/ndownloader/files/24697115)
Supplement: Supplementary file 1 [file 24697115]

## Sheet: Isotope data
#	Reference	Province	Location	Sample Name	Rock Type	Latitude	Longitude	Age (Ma)	Age reference	LOI (%)	Sm (ppm)	Nd (ppm)	Rb (ppm)	Sr (ppm)	U (ppm)	Th (ppm)	Pb (ppm)	143Nd/144Nd	87Sr/86Sr	206Pb/204Pb	207Pb/204Pb	208Pb/204Pb	147Sm/144Nd	(143Nd/144Nd)i	87Rb/86Sr	(87Sr/86Sr)i	238U/204Pb	235U/204Pb	232Th/204Pb	(206Pb/204Pb)i	(207Pb/204Pb)i	(208Pb/204Pb)i	(206Pb/204Pb)used	(207Pb/204Pb)used	(87Sr/86Sr)used	(143Nd/144Nd)used
508	[28]	Southern Kerguelen Plateau	MD48, Dredge 2	s DR02/12	Basalt, Transitional	-57.3	77.6	95.3	This study	N/A			59	366.5	0.21		1.31	0.51253	0.70616	17.539	15.467	37.875			0.465693	0.705529	9.95767	0.0722225	0	17.3907	15.4599
499	[7]	Southern Kerguelen Plateau	MD48, Dredge 2	s MD48DR02.12	Basalt	-57.3	77.6	95.3	This study	5.63	5.32	22.1	62	338		2.1		0.512459	0.706082				0.145526	0.512368	0.530631	0.705237
512	[28]	Southern Kerguelen Plateau	MD48, Dredge 6	s DR06	Basalt, Transitional	-58.283	76.917	95.3	This study	N/A			10	331.5	0.09		0.97	0.51271	0.70427	18.182	15.579	38.277			0.0872484	0.704152	5.85599	0.0424732	0	18.0948	15.5748
509	[7]	Southern Kerguelen Plateau	MD48, Dredge 5	s MD48DR05.11	Basalt	-58.1	76.917	95.3	This study	N/A	4	12.63						0.51271					0.191471	0.512591
511	[7]	Southern Kerguelen Plateau	MD48, Dredge 6	s MD48DR06.14	Basalt	-58.283	76.917	95.3	This study	3.15	6.56	23	11	331		1.8		0.512707	0.704542				0.172434	0.512599	0.0961208	0.704412
510	[28]	Southern Kerguelen Plateau	MD48, Dredge 5	s DR05	Basalt, Transitional	-58.1	76.917	95.3	This study	N/A			28.7	173.1	0.06			0.51279	0.70518	18.068	15.596	38.336			0.479584	0.704531
520	[26]	Southern Kerguelen Plateau	ODP Leg 120, Site 748	s 120-748C-79R-7,65-67	Basalt, Alkaline	-58.4408	78.9815	99.6	This study	N/A								0.512491	0.705157	18.305	15.613	38.495
501	[26]	Southern Kerguelen Plateau	ODP Leg 120, Site 750	s 120-750B-16R-3,134-136	Tholeiite	-57.792	81.2395	112.4	[4]	N/A								0.512902	0.705012	18.112	15.585	38.405
507	[26]	Southern Kerguelen Plateau	ODP Leg 120, Site 750	s 120-750B-17R-3,26-30	Tholeiite	-57.792	81.2395	112.4	[4]	N/A	2.14	7.3		152					0.7053				0.155809		0	0.7053
500	[11]	Southern Kerguelen Plateau	ODP Leg 120, Site 750	s 120-750B-17R-3,23-27	Tholeiite / Basalt	-57.792	81.2395	112.4	[4]	7.12	2.64	7.54	3.15	148	0.053	0.303	0.823	0.512745	0.705438	17.533	15.508	38.048	0.211681	0.512589	0.0615658	0.70534	4.01185	0.0290977	23.7018	17.4624	15.5046	37.9158
502	[11]	Southern Kerguelen Plateau	ODP Leg 120, Site 750	s 120-750B-14R-2,92-95	Tholeiite	-57.792	81.2395	112.4	[4]	5.35	1.52	4.33	1.81	143	0.057	0.305	0.4	0.51291	0.70504	17.55	15.486	37.878	0.212238	0.512754	0.0366114	0.704982	8.85571	0.06423	48.9688	17.3942	15.4785	37.6049
503	[11]	Southern Kerguelen Plateau	ODP Leg 120, Site 750	s 120-750B-16R-7,16-21	Tholeiite	-57.792	81.2395	112.4	[4]	2.17	1.55	4.28	1.55	128	0.052	0.291	0.436	0.512919	0.705026	17.551	15.462	37.66	0.218955	0.512758	0.0350263	0.70497	7.38691	0.0535769	42.7192	17.4211	15.4557	37.4218
504	[11]	Southern Kerguelen Plateau	ODP Leg 120, Site 750	s 120-750B-16R-2.50-56	Tholeiite / Basalt	-57.792	81.2395	112.4	[4]	2.23	1.56	4.14	1.59	126	0.053	0.287	0.367	0.512923	0.705032	17.474	15.404	37.666	0.22782	0.512755	0.0365006	0.704974	8.92847	0.0647577	49.9636	17.317	15.3964	37.3874
505	[11]	Southern Kerguelen Plateau	ODP Leg 120, Site 750	s 120-750B-15R-1,103-108	Tholeiite / Basalt	-57.792	81.2395	112.4	[4]	4.24	1.68	4.53	2.24	167	0.055	0.315	0.457	0.512938	0.705023	17.511	15.435	37.731	0.224223	0.512773	0.0387976	0.704961	7.45453	0.0540673	44.1203	17.3799	15.4287	37.485
506	[11]	Southern Kerguelen Plateau	ODP Leg 120, Site 750	s 120-750B-16R-4,42-47	Tholeiite / Basalt	-57.792	81.2395	112.4	[4]	2.31	1.63	4.36	1.61	127	0.055	0.308	0.483	0.512939	0.705013	17.534	15.455	37.814	0.226032	0.512773	0.0366686	0.704954	7.06566	0.0512469	40.8895	17.4097	15.449	37.586
514	[20]	Southern Kerguelen Plateau	ODP Leg 119, Site 738	s 119-738C-34R-430-33_LEACHED	Tholeiite	-62.709	82.7875	113	This study	1.26									0.70906	17.735	15.721	38.932											17.735	15.721
515	[20]	Southern Kerguelen Plateau	ODP Leg 119, Site 738	s 119-738C-35R-291-94_LEACHED	Tholeiite	-62.709	82.7875	113	This study	1.65									0.70901	17.739	15.725	38.966											17.739	15.725
517	[20]	Southern Kerguelen Plateau	ODP Leg 119, Site 738	s 119-738C-33R-517-21_LEACHED	Tholeiite	-62.709	82.7875	113	This study	0.94									0.70981	17.768	15.744	39.044											17.768	15.744
513	[1]	Southern Kerguelen Plateau	ODP Leg 119, Site 738	s 119-738C-119-738C-36R-1,140-144	Tholeiite	-62.709	82.7875	113	This study	3.43	4.66	17.6	7.08	296				0.512196	0.709049	17.735	15.712	38.86	0.160054	0.512078	0.0692127	0.708938									0.709049	0.512196
516	[20]	Southern Kerguelen Plateau	ODP Leg 119, Site 738	s 119-738C-33R-179-81_LEACHED	Tholeiite	-62.709	82.7875	113	This study	4.99									0.70984	17.752	15.712	38.937
518	[20]	Southern Kerguelen Plateau	ODP Leg 119, Site 738	s 119-738C-33R-265-68_LEACHED	Tholeiite	-62.709	82.7875	113	This study	2.11									0.70922	17.777	15.748	39.142
519	[20]	Southern Kerguelen Plateau	ODP Leg 119, Site 738	s 119-738C-34R-188-92_LEACHED	Tholeiite	-62.709	82.7875	113	This study	0.58									0.70973	17.817	15.75	39.005											17.817	15.75
496	[21]	Southern Kerguelen Plateau	ODP Leg 183, Site 1136	s 183-1136A-18R6,2_LEACHED	Tholeiite	-59.6517	84.835	120.8	[9]	1.15	1.425	3.518	1.78	162.4	0.0322	0.153	0.5126	0.512704	0.70469	17.911	15.58	38.369	0.244886	0.51251	0.0317025	0.704636	3.95511	0.0286862	19.4207	17.8362	15.5764	38.2526	17.8362	15.5764	0.704636	0.51251
495	[21]	Southern Kerguelen Plateau	ODP Leg 183, Site 1136	s 183-1136A-16R2,2A	Tholeiite	-59.6517	84.835	120.8	[9]	3.77	4.058	13.32	2.56	226.9	0.1248	0.866	1.467	0.512673	0.70466	17.955	15.565	38.373	0.184183	0.512527	0.0326335	0.704604	5.35872	0.0388665	38.4269	17.8536	15.5601	38.1427			0.70466	0.512673
498	[21]	Southern Kerguelen Plateau	ODP Leg 183, Site 1136	s 183-1136A-16R2,2A_LEACHED	Tholeiite	-59.6517	84.835	120.8	[9]	3.77					0.0104	0.0176	0.3864			17.906	15.563	38.229					1.69086	0.0122637	2.95705	17.874	15.5615	38.2113
497	[21]	Southern Kerguelen Plateau	ODP Leg 183, Site 1136	s 183-1136A-19R2,9_LEACHED	Tholeiite	-59.6517	84.835	120.8	[9]	N/A	1.017	3.478	27.9	340.9	0.0869	0.343	0.5479	0.512887	0.70543	18.181	15.586	38.865	0.176789	0.512747	0.236738	0.705024	10.092	0.073197	41.1646	17.9901	15.5768	38.6182			0.70543	0.512887
523	[11]	Southern Kerguelen Plateau	ODP Leg 120, Site 749	s 120-749C-15R-4,36-40	Tholeiite / Basalt	-58.7172	76.4075	122.2	This study	1.76	3.82	11.8	9.1	229	0.182	0.838	1.76	0.51277	0.704316	17.99	15.569	38.149	0.195719	0.512614	0.114934	0.704116	6.49719	0.0471238	30.915	17.8657	15.563	37.9615	17.8657	15.563	0.704116	0.512614
524	[11]	Southern Kerguelen Plateau	ODP Leg 120, Site 749	s 120-749C-12R-5,76-79	Tholeiite / Basalt	-58.7172	76.4075	122.2	This study	1.22	3.84	11.6	13.9	215	0.17	0.78	1.78	0.512782	0.704308				0.200137	0.512622	0.18699	0.703983									0.703983	0.512622
525	[11]	Southern Kerguelen Plateau	ODP Leg 120, Site 749	s 120-749C-16R-1,22-29	Tholeiite / Basalt	-58.7172	76.4075	122.2	This study	2.51	4.22	13.6	4.59	232	0.16	0.777	1.21	0.512866	0.703701	18.035	15.554	38.007	0.187601	0.512716	0.0572192	0.703602	8.29521	0.0601647	41.6293	17.8763	15.5463	37.7546
526	[11]	Southern Kerguelen Plateau	ODP Leg 120, Site 749	s 120-749C-16R-5,20-27	Tholeiite	-58.7172	76.4075	122.2	This study	3.42	1.87	5.58	2.68	237	0.132	0.275	0.474	0.512894	0.703569	18.033	15.506	37.854	0.202615	0.512732	0.0327038	0.703512	17.4208	0.126352	37.5059	17.6996	15.4898	37.6266
527	[11]	Southern Kerguelen Plateau	ODP Leg 120, Site 749	s 120-749C-12R-2,99-102	Tholeiite	-58.7172	76.4075	122.2	This study	5.28	2.45	7.21	3.96	183	0.08	0.368	0.763	0.512905	0.703674	17.999	15.543	37.906	0.205446	0.512741	0.0625835	0.703565	6.56404	0.0476086	31.2033	17.8734	15.5369	37.7168
528	[11]	Southern Kerguelen Plateau	ODP Leg 120, Site 749	s 120-749C-16R-6,50-56	Tholeiite	-58.7172	76.4075	122.2	This study	3.22								0.512905
529	[11]	Southern Kerguelen Plateau	ODP Leg 120, Site 749	s 120-749C-12R-3,55-60	Tholeiite / Basalt	-58.7172	76.4075	122.2	This study	4.96	2.67	8.19	2.1	204	0.094	0.42	1.13	0.51291	0.703597	18.016	15.577	37.986	0.197103	0.512752	0.0297716	0.703545	5.21724	0.0378403	24.0898	17.9162	15.5722	37.8399
530	[11]	Southern Kerguelen Plateau	ODP Leg 120, Site 749	s 120-749C-16R-6,50-56	Tholeiite	-58.7172	76.4075	122.2	This study	3.22	2	6.02	0.51	243	0.068	0.289	0.484	0.512923	0.703552	18.033	15.552	37.932	0.200864	0.512762	0.0060698	0.703541	8.80404	0.0638552	38.6671	17.8645	15.5438	37.6975
521	[26]	Southern Kerguelen Plateau	ODP Leg 120, Site 749	s 120-749C-15R-2,35-37	Tholeiite	-58.7172	76.4075	122.2	This study	N/A								0.512763	0.704237	18.2	15.625	38.435
522	[26]	Southern Kerguelen Plateau	ODP Leg 120, Site 749	s 120-749C-15R-5,127-130	Tholeiite	-58.7172	76.4075	122.2	This study	N/A								0.512764	0.704306	17.978	15.587	38.213
531	[26]	Southern Kerguelen Plateau	ODP Leg 120, Site 749	s 120-749C-16R-7,107-109	Tholeiite	-58.7172	76.4075	122.2	This study	N/A									0.703506	18.031	15.579	38.222
532	[26]	Southern Kerguelen Plateau	ODP Leg 120, Site 749	s 120-749C-16R-7,75-77	Tholeiite	-58.7172	76.4075	122.2	This study	N/A	1.95	6.7		240					0.703531	18.065	15.574	38.028
533	[26]	Southern Kerguelen Plateau	ODP Leg 120, Site 749	s 120-749C-12R-4,144-148	Tholeiite	-58.7172	76.4075	122.2	This study	N/A	3.52	10.8		226					0.704268	17.98	15.587	38.204
409	[21]	Central Kerguelen Plateau	ODP Leg 183, Site 1138	s 183-1138A-74R1,4_LEACHED	Tholeiite	-53.5517	75.9717	108.6	This study	1.69	2.673	11.83	12.8	179.5	1.108	4.45	5.807	0.512608	0.7068	17.966	15.478	38.305	0.1366	0.512511	0.206298	0.706482	11.9951	0.087	49.7847	17.7622	15.4682	38.0368	17.7622	15.4682	0.706482	0.512511
412	[21]	Central Kerguelen Plateau	ODP Leg 183, Site 1138	s 183-1138A-89R3,1A	Tholeiite	-53.5517	75.9717	108.6	This study	1.56	8.117	32.2	2.01	217.9	0.5679	2.48	3.216	0.512638	0.70471	18.109	15.499	38.39	0.152398	0.51253	0.0266808	0.704669	11.1392	0.0807919	50.2694	17.9198	15.4899	38.1192	17.9198	15.4899	0.704669	0.51253
413	[21]	Central Kerguelen Plateau	ODP Leg 183, Site 1138	s 183-1138A-84R5,3 / s 183-1138A-84R-5,PIECE3	Tholeiite / Basalt	-53.5517	75.9717	108.6	This study	1.38	5.415	21.23	8.49	203.7	0.3548	1.5	1.951	0.512652	0.7048	18.15	15.497	38.404	0.154202	0.512542	0.120554	0.704614	11.4799	0.083263	50.1552	17.955	15.4876	38.1338	17.955	15.4876	0.704614	0.512542
416	[21]	Central Kerguelen Plateau	ODP Leg 183, Site 1138	s 183-1138A-89R3,1A_LEACHED	Tholeiite	-53.5517	75.9717	108.6	This study	1.56	2.014	5.222	0.403	221.6	0.0281	0.057	0.3592	0.512698	0.70465	18.06	15.495	38.342	0.233167	0.512532	0.00526008	0.704642	4.92795	0.0357422	10.3301	17.9763	15.491	38.2863	17.9763	15.491	0.704642	0.512532
417	[21]	Central Kerguelen Plateau	ODP Leg 183, Site 1138	s 183-1138A-84R5,3_LEACHED	Tholeiite	-53.5517	75.9717	108.6	This study	1.38	2.578	7.178	7.52	179	0.1472	0.629	1.064	0.512699	0.70478	18.124	15.5	38.377	0.217132	0.512545	0.121514	0.704592	8.72731	0.0632987	38.5385	17.9757	15.4929	38.1694	17.9757	15.4929	0.704592	0.512545
414	[21]	Central Kerguelen Plateau	ODP Leg 183, Site 1138	s 183-1138A-80R5,1D_LEACHED	Tholeiite	-53.5517	75.9717	108.6	This study	2.45	1.053	2.894	0.574	245.2	0.0545	0.043	0.6038	0.512684	0.70467	17.994	15.498	38.203	0.219975	0.512528	0.00677095	0.70466	5.67015	0.0411253	4.62314	17.8977	15.4934	38.1781
415	[21]	Central Kerguelen Plateau	ODP Leg 183, Site 1138	s 183-1138A-86R3,2_LEACHED	Tholeiite	-53.5517	75.9717	108.6	This study	2.42	2.089	5.583	1.97	180.9	0.1025	0.195	0.5069	0.512686	0.70469	18.117	15.493	38.417	0.226211	0.512525	0.0314983	0.704641	12.7606	0.0925521	25.0873	17.9002	15.4826	38.2818
410	[21]	Central Kerguelen Plateau	ODP Leg 183, Site 1138	s 183-1138A-80R5,1D	Tholeiite	-53.5517	75.9717	108.6	This study	2.45	4.537	17.29	1.04	237.7	0.1958	1.07	1.567	0.512632	0.70478	18.063	15.501	38.383	0.15864	0.512519	0.0126551	0.70476	7.8766	0.0571286	44.4817	17.9292	15.4946	38.1434
411	[21]	Central Kerguelen Plateau	ODP Leg 183, Site 1138	s 183-1138A-86R3,2	Tholeiite	-53.5517	75.9717	108.6	This study	2.42	6.707	26.39	3.14	159.4	0.4923	2.23	2.232	0.512634	0.70472	18.157	15.512	38.482	0.153648	0.512525	0.0569772	0.704632	13.9426	0.101125	65.2662	17.9201	15.5006	38.1304
392	[28]	Central Kerguelen Plateau	MD48, Dredge 8	s DR08	Basalt, Transitional	-50.317	74.817	92.8	This study	N/A	3.2	13.3	65.1	799.2	1.25		6.19	0.51254	0.70611	17.938	15.549	38.521	0.145455	0.512452	0.235638	0.705799	12.7404	0.0924058	0	17.7533	15.5402	38.521
394	[28]	Central Kerguelen Plateau	MD48, Dredge 8	s DR08/05	Basalt, Transitional	-50.317	74.817	92.8	This study	N/A	3.3	12.1	52.7	583.7	0.5		2.19	0.5127	0.70543	18.419	15.542	38.767	0.164882	0.5126	0.261163	0.705086	14.5459	0.105501	0	18.2081	15.5319	38.767
395	[26]	Central Kerguelen Plateau	ODP Leg 120, Site 747	s 120-747C-16R-2,81-84	Tholeiite	-54.8114	76.794	92.8	This study	N/A								0.51241	0.705866	17.608	15.508	38.072
399	[26]	Central Kerguelen Plateau	ODP Leg 120, Site 747	s 120-747C-12R-4,45-46	Tholeiite	-54.8114	76.794	92.8	This study	N/A								0.512435	0.705508	17.466	15.461	37.977
402	[26]	Central Kerguelen Plateau	ODP Leg 120, Site 747	s 120-747C-12R-2,122-124	Tholeiite	-54.8114	76.794	92.8	This study	N/A								0.512445	0.70566
404	[26]	Central Kerguelen Plateau	ODP Leg 120, Site 747	s 120-747C-16R-2,85-87	Tholeiite	-54.8114	76.794	92.8	This study	N/A								0.512452	0.705895	18.275	15.643	38.459
405	[11]	Central Kerguelen Plateau	ODP Leg 120, Site 747	s 120-747C-15R-1,15-19	Tholeiite / Basalt	-54.8114	76.794	92.8	This study	9.72	3.9	17.5	19.2	220	0.17	1.11	2.26	0.512454	0.705828	17.647	15.516	38.129	0.134725	0.512372	0.252456	0.705495	4.69924	0.0340833	31.7083	17.5789	15.5127	37.9831
406	[11]	Central Kerguelen Plateau	ODP Leg 120, Site 747	s 120-747C-12R-4,53-56	Tholeiite / Basalt	-54.8114	76.794	92.8	This study	2.56	4.07	16.8	2.56	252	0.22	1.19	2.15	0.512457	0.705533	17.36	15.388	37.723	0.146455	0.512368	0.0293856	0.705494	6.31995	0.0458382	35.3272	17.2684	15.3836	37.5604
407	[11]	Central Kerguelen Plateau	ODP Leg 120, Site 747	s 120-747C-14R-2.27-31	Tholeiite	-54.8114	76.794	92.8	This study	8.88								0.51247
408	[11]	Central Kerguelen Plateau	ODP Leg 120, Site 747	s 120-747C-14R-2.27-31	Tholeiite	-54.8114	76.794	92.8	This study	8.88	5.37	24.6	24.5	203	0.3	2.19	2.79	0.512494	0.705639	17.399	15.414	37.828	0.131966	0.512414	0.349116	0.705179	6.657	0.0482829	50.2195	17.3025	15.4094	37.5969
403	[11]	Central Kerguelen Plateau	ODP Leg 120, Site 747	s 120-747C-11R-1,0-5	Tholeiite	-54.8114	76.794	92.8	This study	5.15	5	21	11.3	271	0.495	1.66	3.29	0.51245	0.705552	17.421	15.439	37.826	0.143936	0.512363	0.120616	0.705393	9.32057	0.0676016	32.301	17.2859	15.4325	37.6774
400	[11]	Central Kerguelen Plateau	ODP Leg 120, Site 747	s 120-747C-15R-2.134-139	Tholeiite	-54.8114	76.794	92.8	This study	8.29	4.03	17.9	9.91	243	0.19	1.13	2.23	0.512436	0.705742	17.709	15.502	38.092	0.136104	0.512353	0.11797	0.705586	5.32352	0.0386112	32.7186	17.6318	15.4983	37.9414
401	[11]	Central Kerguelen Plateau	ODP Leg 120, Site 747	s 120-747C-16R-5,17-21	Tholeiite	-54.8114	76.794	92.8	This study	6.08	3.56	15.3	2.62	274	0.191	1.15	1.9	0.512444	0.750719	17.594	15.519	38.094	0.140662	0.512359	0.0277819	0.750682	6.27274	0.0454958	39.0295	17.503	15.5146	37.9144
396	[11]	Central Kerguelen Plateau	ODP Leg 120, Site 747	s 120-747C-14R-1,31-35	Tholeiite / Basalt	-54.8114	76.794	92.8	This study	4.87	4.56	19.2	4.35	253	0.19	1.64	2.39	0.512412	0.705738	17.427	15.448	37.863	0.143575	0.512325	0.0497361	0.705672	4.92838	0.0357453	43.9608	17.3555	15.4446	37.6607
397	[11]	Central Kerguelen Plateau	ODP Leg 120, Site 747	s 120-747C-13R-3.24-28	Tholeiite	-54.8114	76.794	92.8	This study	5.35	5.34	22.9	10.3	275	0.24	1.77	2.98	0.512423	0.705781	17.463	15.459	37.881	0.140969	0.512337	0.108345	0.705638	4.99731	0.0362452	38.0863	17.3905	15.4555	37.7057
398	[11]	Central Kerguelen Plateau	ODP Leg 120, Site 747	s 120-747C-16R-2,53-59	Tholeiite	-54.8114	76.794	92.8	This study	4.71	3.31	14.9	18	259	0.134	0.961	1.67	0.512435	0.705886	17.656	15.523	38.114	0.134295	0.512353	0.20104	0.705621	5.01281	0.0363576	37.151	17.5833	15.5195	37.943
393	[7]	Central Kerguelen Plateau	MD48, Dredge 8	s MD48DR08.04	Basalt	-50.317	74.817	92.8	This study	4.65	4.73	16.6	9	176		1.5		0.512654					0.172264	0.512549
420	[30]	Elan Bank	ODP Leg 183, Site 1137	s 183-1137A-40R-2,119-121	Basalt	-56.8333	68.0933	109	This study	1.37			11.7	491				0.512438	0.706059	17.95	15.643	38.95			0.0689321	0.705952							17.95	15.643	0.706059	0.512438
425	[15]	Elan Bank	ODP Leg 183, Site 1137	s 183-1137A-38R-4,71-77	Basalt, Transitional / Basalt	-56.8333	68.0933	109	This study	1.92	6.03	27.1	16.5	485		3.28		0.512495	0.70569	17.974	15.641	38.91	0.134515	0.512399	0.098411	0.705538							17.974	15.641	0.705538	0.512399
426	[30]	Elan Bank	ODP Leg 183, Site 1137	s 183-1137A-38R-3,83-86	Basalt	-56.8333	68.0933	109	This study	1.55			5.3	526				0.512504	0.705606	17.999	15.637	38.71			0.0291466	0.705561							17.999	15.637	0.705606	0.512504
430	[30]	Elan Bank	ODP Leg 183, Site 1137	s 183-1137A-46R-2,92-95	Basalt	-56.8333	68.0933	109	This study	1.02			18.7	489				0.512543	0.705686	18.015	15.654	38.91			0.11062	0.705515							18.015	15.654	0.705686	0.512543
435	[15]	Elan Bank	ODP Leg 183, Site 1137	s 183-1137A-26R-2,17-23	Basalt, Transitional	-56.8333	68.0933	109	This study	0.96	7.03	31	20.2	508		2.56		0.51255	0.705092	18.002	15.616	38.634	0.137096	0.512452	0.115017	0.704914							18.002	15.616	0.704914	0.512452
438	[15]	Elan Bank	ODP Leg 183, Site 1137	s 183-1137A-6R-1,143-146	Basalt, Transitional	-56.8333	68.0933	109	This study	1.53	5.77	24.6	12.3	529		2		0.512555	0.705029	17.997	15.617	38.617	0.141798	0.512454	0.0672547	0.704925							17.997	15.617	0.704925	0.512454
444	[30]	Elan Bank	ODP Leg 183, Site 1137	s 183-1137A-26R-2,5-7	Basalt	-56.8333	68.0933	109	This study	0.71			17.5	531				0.512567	0.705075	17.995	15.611	38.6			0.0953276	0.704927							17.995	15.611	0.705075	0.512567
445	[30]	Elan Bank	ODP Leg 183, Site 1137	s 183-1137A-28R-4,28-30	Basalt	-56.8333	68.0933	109	This study	1.13			12	553				0.512576	0.704941	17.995	15.587	38.53			0.0627662	0.704844							17.995	15.587	0.704941	0.512576
446	[15]	Elan Bank	ODP Leg 183, Site 1137	s 183-1137A-26R-1,31-43	Basalt, Transitional / Basalt	-56.8333	68.0933	109	This study	1.8	6.71	28.2	12.9	520		2.22		0.512576	0.704999	18.016	15.644	38.663	0.143849	0.512473	0.071756	0.704888							18.016	15.644	0.704888	0.512473
450	[30]	Elan Bank	ODP Leg 183, Site 1137	s 183-1137A-31R-4,48-51	Basalt	-56.8333	68.0933	109	This study	1.13			8.8	601				0.512587	0.704903	18.039	15.614	38.64			0.0423522	0.704837							18.039	15.614	0.704903	0.512587
423	[15]	Elan Bank	ODP Leg 183, Site 1137	s 183-1137A-40R-1,14-16	Basalt, Transitional	-56.8333	68.0933	109	This study	N/A								0.512463	0.706098	17.961	15.667	39.065
451	[15]	Elan Bank	ODP Leg 183, Site 1137	s 183-1137A-32R-6,66-71	Basalt, Transitional	-56.8333	68.0933	109	This study	4.74	6.63	27.6	12.7	545		2.08		0.5126	0.704885	18.015	15.605	38.631	0.145224	0.512496	0.0674022	0.704781
447	[15]	Elan Bank	ODP Leg 183, Site 1137	s 183-1137A-29R-1,30-37	Basalt, Transitional	-56.8333	68.0933	109	This study	5.03	7.27	31	6.6	566		2.54		0.512577	0.704825	17.995	15.617	38.622	0.141777	0.512476	0.0337281	0.704773
448	[15]	Elan Bank	ODP Leg 183, Site 1137	s 183-1137A-28R-3,123-128	Basalt, Transitional	-56.8333	68.0933	109	This study	2.73	7.07	29.4	16	532		2.4		0.51258	0.70492	18.01	15.608	38.603	0.14538	0.512476	0.0869915	0.704785
449	[15]	Elan Bank	ODP Leg 183, Site 1137	s 183-1137A-25R-7,90-98	Basalt, Transitional	-56.8333	68.0933	109	This study	3.62	6.41	27.9	12.2	536		2.27		0.512583	0.704987	17.989	15.62	38.575	0.138895	0.512484	0.0658365	0.704885
439	[15]	Elan Bank	ODP Leg 183, Site 1137	s 183-1137A-25R-2,119-126	Basalt, Transitional	-56.8333	68.0933	109	This study	2.88	6.39	28.4	8.5	537		2.4		0.512559	0.704967	17.993	15.616	38.551	0.136023	0.512462	0.0457842	0.704896
440	[15]	Elan Bank	ODP Leg 183, Site 1137	s 183-1137A-27R-4,57-63	Basalt, Transitional / Basalt	-56.8333	68.0933	109	This study	6.22	6.89	29.4	17.9	523		2.36		0.512565	0.704921	18.012	15.623	38.681	0.141678	0.512464	0.0989965	0.704768
441	[15]	Elan Bank	ODP Leg 183, Site 1137	s 183-1137A-33R-1,53-60	Basalt, Transitional / Basalt	-56.8333	68.0933	109	This study	4.96	6.54	28.2	8.6	560		2.52		0.512565	0.704879	18.019	15.608	38.692	0.140204	0.512465	0.0444199	0.70481
442	[15]	Elan Bank	ODP Leg 183, Site 1137	s 183-1137A-31R-3,85-90	Basalt, Transitional	-56.8333	68.0933	109	This study	3.66	6.02	25.5	11.2	573		2.12		0.512566	0.704932	18.036	15.63	38.741	0.142721	0.512464	0.056537	0.704844
443	[15]	Elan Bank	ODP Leg 183, Site 1137	s 183-1137A-25R-1,64-72	Basalt, Transitional / Basalt	-56.8333	68.0933	109	This study	2.85	6.56	28.8	6	536		2.9		0.512566	0.705005	18.009	15.619	38.567	0.137703	0.512468	0.0323786	0.704955
436	[30]	Elan Bank	ODP Leg 183, Site 1137	s 183-1137A-25R-1,106-108	Basalt	-56.8333	68.0933	109	This study	2.19			12	549				0.51255	0.705068	17.989	15.594	38.55			0.0632243	0.70497
437	[15]	Elan Bank	ODP Leg 183, Site 1137	s 183-1137A-24R-2,10-11	Tholeiite	-56.8333	68.0933	109	This study	4.82	6.27	25.7				2.09		0.512553	0.705012	18.018	15.62	38.592	0.147491	0.512448
431	[15]	Elan Bank	ODP Leg 183, Site 1137	s 183-1137A-46R-1,51-56	Basalt, Transitional / Basalt	-56.8333	68.0933	109	This study	3.04	6.72	28.9	14.2	494		2.72		0.512543	0.705633	18.006	15.646	38.876	0.140573	0.512443	0.0831496	0.705504
432	[15]	Elan Bank	ODP Leg 183, Site 1137	s 183-1137A-46R-2,7-15	Basalt, Transitional	-56.8333	68.0933	109	This study	2.15	6.9	29.3	19.9	478		3.02		0.512546	0.705728	18.016	15.662	38.931	0.142368	0.512444	0.120428	0.705541
433	[15]	Elan Bank	ODP Leg 183, Site 1137	s 183-1137A-31R-3,5-10	Basalt, Transitional / Basalt	-56.8333	68.0933	109	This study	4.42	5.41	23.4	11	540		1.64		0.512546	0.70493	18.072	15.635	38.847	0.139769	0.512446	0.0589207	0.704839
434	[15]	Elan Bank	ODP Leg 183, Site 1137	s 183-1137A-25R-2,46-53	Basalt, Transitional	-56.8333	68.0933	109	This study	2.37	6.26	26.7	12	530		2.16		0.512549	0.705066	18.018	15.625	38.625	0.14174	0.512448	0.0654908	0.704965
427	[15]	Elan Bank	ODP Leg 183, Site 1137	s 183-1137A-45R-3,57-63	Tholeiite	-56.8333	68.0933	109	This study	3.76	6.7	29.9				2.68		0.512512	0.70565	18.011	15.654	38.946	0.135466	0.512415
428	[15]	Elan Bank	ODP Leg 183, Site 1137	s 183-1137A-38R-3,63-68	Basalt, Transitional	-56.8333	68.0933	109	This study	4.48	6.1	27.1				3.09		0.512519	0.705625	17.962	15.639	38.887	0.136078	0.512422
429	[15]	Elan Bank	ODP Leg 183, Site 1137	s 183-1137A-46R-3,12-18	Basalt, Transitional	-56.8333	68.0933	109	This study	2.36	7.32	29.7	19.3	455		2.87		0.512541	0.70568	18.011	15.658	38.915	0.148999	0.512435	0.122701	0.70549
424	[15]	Elan Bank	ODP Leg 183, Site 1137	s 183-1137A-39R-1,101-108	Basalt, Transitional	-56.8333	68.0933	109	This study	2.37	6.17	26.9	16.7	484		3.23		0.512488	0.705774	18.004	15.662	39.033	0.138662	0.512389	0.0998105	0.705619
421	[15]	Elan Bank	ODP Leg 183, Site 1137	s 183-1137A-40R-3,117-124	Basalt, Transitional / Basalt	-56.8333	68.0933	109	This study	2.37	6.34	26.5	36.1	456		3.65		0.512455	0.706256	17.999	15.668	39.144	0.144632	0.512352	0.229017	0.705901
422	[15]	Elan Bank	ODP Leg 183, Site 1137	s 183-1137A-41R-1,3-10	Basalt, Transitional / Basalt	-56.8333	68.0933	109	This study	4.19	6.23	26.6	9.3	483		3.7		0.512461	0.706027	17.969	15.665	39.059	0.141588	0.51236	0.0556995	0.705941
418	[14]	Elan Bank	ODP Leg 183, Site 1137	s 183-1137A-36R-1,27-32_LEACHED	Phonotephrite	-56.8333	68.0933	109	This study	2.42								0.512363	0.706814	18.085	15.628	38.699
419	[14]	Elan Bank	ODP Leg 183, Site 1137	s 183-1137A-36R-1,27-32	Phonotephrite	-56.8333	68.0933	109	This study	2.42	15	80	70	490	1.9	9.3	12	0.512378	0.706878	18.237	15.678	39.054	0.113348	0.512297	0.413289	0.706238	10.1209	0.073406	51.1938	18.0644	15.6697	38.7772
177	[21]	Broken Ridge	ODP Leg 183, Site 1142	s 183-1142A9R3,91-94_LEACHED	Basalt, Alkaline	-32.2317	97.125	99.1	This study	1.28	2.392	7.505	15.2	163.5	0.3952	2.03	4.104	0.512675	0.70591	17.998	15.625	38.97	0.192687	0.51255	0.268928	0.705531	6.12418	0.0444184	32.5086	17.9031	15.6204	38.8102	17.9031	15.6204	0.705531	0.51255
169	[20]	Broken Ridge	Central Broken Ridge, Dredge 10	s M-D10-1_LEACHED	Basalt	-31.23	93.7	97.6	This study	0.94	1.284	3.223	0.82	156.1			0.27			18.002	15.543	38.879	0.211741										18.002	15.543
173	[20]	Broken Ridge	Eastern Broken Ridge, Dredge 8	s M-D8-1_LEACHED	Basalt	-32.4	98.33	97.6	This study	0.1	1.538	4.324	0.48	352.6						17.982	15.625	39.059	0.189048										17.982	15.625
174	[20]	Broken Ridge	Eastern Broken Ridge, Dredge 8	s D8-E-1A_UNLEACHED	Basalt	-32.4	98.33	97.6	This study	0.24	4.558	15.81	6.03	131.1			2.94			17.997	15.65	39.273	0.15323										17.997	15.65
166	[21]	Broken Ridge	ODP Leg 183, Site 1141	s 183-1141A-13R1,1_LEACHED	Basalt, Alkaline	-32.2267	97.1283	99.1	This study	N/A	1.443	4.739	14.4	463.4	0.0453	0.151	1.08	0.512656	0.70545	18.092	15.598	38.732	0.184086	0.512537	0.0898872	0.705323	2.6613	0.0193023	9.16736	18.0508	15.596	38.6869
170	[20]	Broken Ridge	Central Broken Ridge, Dredge 10	s M-D-2_UNLEACHED	Basalt	-31.23	93.7	97.6	This study	N/A	3.521	12.04	7.51	190.7			0.67			18.249	15.498	38.398	0.155432
171	[20]	Broken Ridge	Central Broken Ridge, Dredge 10	s M-D10-3 / s M-D10-3_UNLEACHED	Basalt	-31.23	93.7	95	This study	3.61	1.455	3.573	3.79	187.1		1.7	0.1			18.473	15.614	39.223	0.216437
172	[20]	Broken Ridge	Central Broken Ridge, Dredge 9	s M-D9-3_LEACHED	Basalt	-31.4	93.33	95	This study	2.54	1.809	5.318	2.96	237.1			0.54			18.128	15.513	38.453	0.180797
175	[21]	Broken Ridge	ODP Leg 183, Site 1142	s 183-1142A2R1,2A	Basalt, Alkaline	-32.2317	97.125	94.5	This study	3.18	7.538	33.54	5.62	439	0.2422	1.32	2.307	0.51262	0.70548	18.104	15.596	38.78	0.135872	0.512536	0.0370309	0.70543	6.66638	0.0483509	37.5458	18.0056	15.5913	38.604
176	[21]	Broken Ridge	ODP Leg 183, Site 1142	s 183-1142A2R1,2A_LEACHED	Basalt, Alkaline	-32.2317	97.125	94.5	This study	3.18	2.448	8.143	5.17	482.3	0.0812	0.033	1.125	0.512647	0.70545	18.085	15.59	38.722	0.181747	0.512535	0.0310073	0.705408	4.578	0.033204	1.92267	18.0174	15.5868	38.713
167	[21]	Broken Ridge	ODP Leg 183, Site 1141	s 183-1141A-23R4,2_LEACHED	Basalt, Alkaline	-32.2267	97.1283	95.2	This study	5.07							2.495			18.1	15.591	38.709
168	[21]	Broken Ridge	ODP Leg 183, Site 1141	s 183-1141A-18R2,1	Basalt, Alkaline	-32.2267	97.1283	95.2	This study	6.4										18.101	15.616	38.873
163	[21]	Broken Ridge	ODP Leg 183, Site 1141	s 183-1141A-23R4,2	Basalt, Alkaline	-32.2267	97.1283	95.2	This study	5.07	7.521	33.51	8.86	457.5	0.2847	1.32	2.386	0.512629	0.70551	18.125	15.604	38.8	0.135687	0.512544	0.0560191	0.705434	7.58175	0.0549901	36.3268	18.0122	15.5986	38.6285
164	[21]	Broken Ridge	ODP Leg 183, Site 1141	s 183-1141A-18R2,1	Basalt, Alkaline	-32.2267	97.1283	95.2	This study	6.4	2.859	11.09	10.7	573.2	0.1623	0.712	1.998	0.512646	0.70563	18.1	15.615	38.88	0.155856	0.512549	0.0539978	0.705557	5.16616	0.0374699	23.4207	18.0231	15.6113	38.7694
165	[21]	Broken Ridge	ODP Leg 183, Site 1141	s 183-1141A-23R4,2_LEACHED	Basalt, Alkaline	-32.2267	97.1283	95.2	This study	5.07	2.427	8.568	9.43	497.2	0.2597	0.938	2.494	0.51265	0.70549	18.1	15.592	38.716	0.17125	0.512543	0.0548622	0.705416	6.6056	0.04791	24.6555	18.0017	15.5873	38.5996
4	[10]	Bunbury Basalt	Casuarina Point	s 86683	Basalt	-33.32	115.63	133	[22]	1.12	3.99	12	2.3	226		0.4			0.70486	17.982	15.6	38.026	0.176723		0.0294365	0.704804							17.982	15.6
5	[10]	Bunbury Basalt	Casuarina Point	s 86684	Basalt	-33.32	115.63	133	[22]	1.03	3.95	11.8	3.9	228		0.5			0.70428	17.905	15.576	37.939	0.177917		0.0494733	0.704186							17.905	15.576
6	[10]	Bunbury Basalt	Casuarina Point	s 86693	Basalt	-33.32	115.63	133	[22]	0.31	4.88	15	7.2	231		1.11			0.70493	17.95	15.589	38.151	0.172914		0.0901549	0.70476							17.95	15.589
7	[10]	Bunbury Basalt	Casuarina Point	s 869896	Basalt	-33.32	115.63	133	[22]	1.15	4.13	12.2	6.2	230		0.74			0.70477	17.926	15.574	38.016	0.179925		0.0779697	0.704623							17.926	15.574
8	[10]	Bunbury Basalt	Capel River	s 86700	Basalt	-33.6	115.55	133	[22]	1.16	5.17	16.1	11.2	238		0.97			0.70532	17.931	15.605	38.21	0.170673		0.136121	0.705063							17.931	15.605
9	[10]	Bunbury Basalt	Casuarina Point	s 86694	Basalt	-33.32	115.63	133	[22]	1.01	4.95	15.6	8.1	234		1.24		0.512681	0.70479	17.908	15.571	38.141	0.191833	0.512514	0.100123	0.704601							17.908	15.571	0.704601	0.512514
10	[10]	Bunbury Basalt	Casuarina Point	s 86697	Basalt	-33.32	115.63	133	[22]	1.8	4.81	15.4	10	243		0.95		0.512681	0.70534	17.951	15.621	38.263	0.188829	0.512517	0.119037	0.705115							17.951	15.621	0.705115	0.512517
17	[24]	Bunbury Basalt	Gelorup Quarry	s BN-3	Basalt	-33.4069	115.654	133	[22]	0	5.66	17.6	7.8	247.2	0.33	1.32	13	0.512703	0.704961	17.9163	15.5813	38.2401	0.194424	0.512534	0.0912676	0.704788	1.59558	0.0115727	6.59554	17.883	15.5797	38.1966	17.883	15.5797	0.704788	0.512534
13	[10]	Bunbury Basalt	Black Point	s 86722	Basalt	-34.4228	115.541	130	[22]	0.95	3.68	12.9	11	161		2.1			0.70822	17.996	15.608	38.044	0.151621		0.197686	0.707855							17.996	15.608
14	[10]	Bunbury Basalt	Black Point	s 86719	Basalt	-34.4228	115.541	130	[22]	0.43	3.44	11.3	7.5	167		1.69			0.70817	18.049	15.717	39.082	0.161801		0.129943	0.70793							18.049	15.717
15	[10]	Bunbury Basalt	Black Point	s 86723	Basalt	-34.4228	115.541	130	[22]	0.75	3.5	11.6	12	165		2.22		0.512385	0.70812	18.032	15.661	38.333	0.182399	0.51223	0.210427	0.707731							18.032	15.661	0.707731	0.51223
16	[10]	Bunbury Basalt	Black Point	s 86724	Basalt	-34.4228	115.541	130	[22]	0.99	3.17	10	5.6	163		1.65		0.512387	0.70789	18.046	15.674	38.33	0.191634	0.512224	0.099402	0.707706							18.046	15.674	0.707706	0.512224
2	[10]	Bunbury Basalt	Donnelly River	s 86712	Basalt	-34.4833	115.685	137	[22]	1.03	3.91	12.2	3	232		0.55		0.512819	0.70438	17.977	15.593	38.009	0.193765	0.512645	0.0374006	0.704307							17.977	15.593	0.704307	0.512645
3	[10]	Bunbury Basalt	S. Nannup Road Cutting	s 86714	Basalt	-34.4	115.8	136	[22]	1.51	3.45	11.7	10.7	163		1.82			0.70816	18.001	15.63	38.272	0.156724		0.189934	0.707793							18.001	15.63
1	[10]	Bunbury Basalt	Donnelly River	s 86713	Basalt	-34.4833	115.685	137	[22]	0.7	4.15	12.8	4.2	233		0.4			0.70411	17.999	15.602	37.985	0.172321		0.0521348	0.704008							17.999	15.602
19	[24]	Bunbury Basalt	Black Point	s BN-10	Basalt	-34.4228	115.541	130	[22]	0.12	3.88	13.1	12.1	168.6	0.3	2.12	16	0.512397	0.708128	18.0738	15.728	39.2068	0.17905	0.512244	0.20765	0.707745	1.19919	0.00869764	8.75734	18.0493	15.7268	39.1503	18.0493	15.7268	0.707745	0.512244
18	[24]	Bunbury Basalt	Gelorup Quarry	s BN-4	Basalt	-33.4069	115.654	137	[22]	0	5.6	18	7.6	247.4	0.31	1.37	13	0.512703	0.70493	18.0162	15.6052	38.3346	0.188088	0.512535	0.0888552	0.704757	1.50337	0.0109039	6.86588	17.9839	15.6036	38.2879	17.9839	15.6036	0.704757	0.512535
21	[24]	Bunbury Basalt	Donnelly River	s BN-22	Basalt	-34.4833	115.685	137	[22]	0	4.7	14.2	3.9	243.3	0.1	0.7	8	0.512828	0.704165	18.005	15.5634	38.04	0.20011	0.512649	0.0463617	0.704075	0.784294	0.00568844	5.67346	17.9882	15.5626	38.0014	17.9882	15.5626	0.704075	0.512649
22	[24]	Bunbury Basalt	Donnybrook Paleovalley	s BN-25	Basalt	-33.594	115.815	136	[24]	0.84	3.6	12.6	18.8	163.7	0.2	2	3	0.512409	0.709426	18.0826	15.7203	39.1793	0.172722	0.512255	0.33233	0.708784	4.26225	0.0309139	44.0463	17.9918	15.7158	38.8819	17.9918	15.7158	0.708784	0.512255
23	[24]	Bunbury Basalt	Donnybrook Paleovalley	s BN-26	Basalt	-33.594	115.815	136	[24]	0.07	3.3	11.8	11.9	162.6	0.3	1.9	4.4	0.512403	0.708627	18.0279	15.7	39.0936	0.169062	0.512252	0.211764	0.708218	4.34965	0.0315478	28.4681	17.9352	15.6955	38.9014	17.9352	15.6955	0.708218	0.512252
24	[24]	Bunbury Basalt	Donnybrook Paleovalley	s BN-28	Basalt	-33.594	115.813	136	[24]	0	3.3	10.6	13.2	159	0.2	1.6	4.3	0.512404	0.70847	18.0443	15.7204	39.1642	0.188201	0.512236	0.240213	0.708006	2.97152	0.0215523	24.5663	17.9809	15.7173	38.9983	17.9809	15.7173	0.708006	0.512236
25	[24]	Bunbury Basalt	Donnybrook Paleovalley	s BN-29	Basalt	-33.594	115.813	136	[24]	0.9	3.5	12.4	3.6	198.6	0.2	2.2	3.5	0.512401	0.708651	18.0462	15.7243	39.1862	0.170632	0.512249	0.0524506	0.70855	3.6521	0.0264885	41.5152	17.9683	15.7205	38.9059	17.9683	15.7205	0.70855	0.512249
11	[5]	Bunbury Basalt	Casuarina Point	s BB3	Tholeiite	-33.32	115.63	133	[22]	8.59	5.13	16.8	8	227		1.31		0.512741	0.70482	17.905	15.584	38.22	0.184611	0.51258	0.101936	0.704627
12	[5][27]	Bunbury Basalt	Casuarina Point	s BB1	Basalt / Tholeiite	-33.32	115.63	133	[22]	8.46	3.77		4	228		0.69		0.512882	0.704128	17.967	15.551	37.946			0.0507411	0.704032
49	[176]	Comei Province	Laguila Intrusive Rocks	D1618-2	Gabbro	28.19	92.22	135	[176]	1.69	33.3	8.43	43.83	679.22	0.63	2.87	4.03	0.512681	0.70637	18.863	15.683	39.239	2.38814	0.512228	0.186677	0.706012	10.1025	0.0732726	47.5597	18.6492	15.6726	38.9203	18.6492	15.6726	0.706012	0.512228
50	[176]	Comei Province	Laguila Intrusive Rocks	D1619	Gabbro	28.19	92.22	135	[176]	1.69	30.78	7.61	23.78	624.16	0.59	2.48	4.87	0.512727	0.7061	19.008	15.633	39.2			0.110213	0.705889	7.83491	0.0568262	34.0334	18.8422	15.6249	38.9719	18.8422	15.6249	0.7061	0.512727
53	[176]	Comei Province	Laguila Intrusive Rocks	D1631-2	Dolerite	28.19	92.22	133	[176]	1.82	26.54	6.7	26.57	686.81	0.48	2.06	3.99	0.512586	0.70559						0.111906	0.705378									0.70559	0.512586
54	[176]	Comei Province	Laguila Intrusive Rocks	D1631-3	Dolerite	28.19	92.22	133	[176]	1.78	34.46	8.48	30.97	671.98	0.66	2.85	5.46	0.51285	0.70689	18.839	15.678	39.148	2.45686	0.512834	0.133333	0.706638	7.7991	0.0565664	34.803	18.6764	15.6701	38.9182	18.6764	15.6701	0.706638	0.512834
56	[178]	Comei Province	Juelongpu	D158h	Basalt	28.45	91.93	140	[178]	1.22	10.1	45.6	27.1	499	0.8	3.1	9.5	0.512636		19.004	15.635	39.22	0.133905	0.512513			5.44732	0.0395091	21.8135	18.8844	15.6292	39.0684	18.8844	15.6292
64	[179]	Comei Province	Dala area	T0766-4	Dolerite	28.62	92.22	132	[179]	1.9	4.42	18.3	47.1	302	0.64	3.43	5.63	0.51246	0.707861				0.146013	0.512334	0.45124	0.707014									0.707014	0.512334
65	[179]	Comei Province	Dala area	T0766-5	Dolerite	28.62	92.22	132	[179]	1.4	5.71	24.5	78.9	306	0.77	4.53	4.48	0.51249	0.707954				0.140894	0.512368	0.746025	0.706554									0.706554	0.512368
66	[179]	Comei Province	Dala area	T0766-7	Dolerite	28.62	92.22	132	[179]	1.8	5.24	21.6	48.9	327	0.7	3.99	4.39	0.51248	0.707821				0.146656	0.512353	0.432666	0.707009									0.707009	0.512353
67	[179]	Comei Province	Dala area	T0766-9	Dolerite	28.62	92.22	132	[179]	1.4	6.47	27.5	57.3	357	0.94	5.24	6.73	0.51248	0.708026				0.142231	0.512357	0.464394	0.707155									0.707155	0.512357
68	[179]	Comei Province	Dala area	T0766-10	Dolerite	28.62	92.22	132	[179]	2	6.75	28.4	82.8	394	0.97	4.93	11.8	0.51252	0.709825				0.143685	0.512396	0.608151	0.708684									0.708684	0.512396
69	[179]	Comei Province	Dala area	T0766-11	Dolerite	28.62	92.22	132	[179]	1	6.65	27.8	5	533	0.79	4.58	4.99	0.51256	0.708941				0.144613	0.512435	0.0271445	0.70889									0.70889	0.512435
71	[179]	Comei Province	Dala area	T0766-14	Dolerite	28.62	92.22	132	[179]	1.3	7.57	31.8	38.8	483	0.98	5.91	5.97	0.51248	0.707711				0.14391	0.512356	0.232419	0.707275									0.707275	0.512356
72	[179]	Comei Province	Dala area	T0766-15	Dolerite	28.62	92.22	132	[179]	1.7	8.42	34.7	49.9	370	1.19	6.93	6.52	0.51252	0.707977				0.146693	0.512393	0.390209	0.707245									0.707245	0.512393
73	[179]	Comei Province	Dala area	T0766-16	Dolerite	28.62	92.22	132	[179]	1.4	8.14	34.6	43.8	370	1.15	6.96	8.43	0.51248	0.708069				0.142223	0.512357	0.342511	0.707426									0.707426	0.512357
74	[179]	Comei Province	Dala area	T0766-17	Dolerite	28.62	92.22	132	[179]	0.9	11.2	47.9	38.3	151	1.78	9.98	7.15	0.51249	0.708476				0.141353	0.512368	0.733908	0.707099									0.707099	0.512368
75	[179]	Comei Province	Dala area	T0766-18	Dolerite	28.62	92.22	132	[179]	0.9	9.16	39.5	49.1	408	1.27	7.56	5.61	0.51246	0.708075				0.140191	0.512339	0.348196	0.707422									0.707422	0.512339
76	[179]	Comei Province	Dala area	T0766-19	Dolerite	28.62	92.22	132	[179]	1.4	7.06	29.6	37.1	579	1.02	5.92	4.91	0.51249	0.707845				0.144191	0.512365	0.185391	0.707497									0.707497	0.512365
89	[180]	Comei Province	Gyangze-Kangma area	T0904-3	Dolerite	28.39	89.82	121	[180]	1.73	3	6.7	2.2	152	0.18	0.65	1.12	0.512797	0.705198				0.270708	0.512583	0.0418658	0.705126									0.705126	0.512583
90	[180]	Comei Province	Gyangze-Kangma area	T0904-4	Dolerite	28.39	89.82	121	[180]	1.74	3	7	2.4	139	0.16	0.62	1.13	0.512914	0.704637				0.259114	0.512709	0.0499405	0.704551									0.704551	0.512709
91	[180]	Comei Province	Gyangze-Kangma area	T0904-5	Dolerite	28.39	89.82	121	[180]	1.99	2.61	6	4.9	138	0.15	0.56	0.99	0.513031	0.704633				0.263008	0.512823	0.102701	0.704456									0.704456	0.512823
92	[180]	Comei Province	Gyangze-Kangma area	T0904-6	Dolerite	28.39	89.82	121	[180]	1.91	2.64	6.3	5.4	158	0.15	0.56	1.06	0.512954	0.704679				0.253358	0.512753	0.0988542	0.704509									0.704509	0.512753
93	[180]	Comei Province	Gyangze-Kangma area	T0904-7	Dolerite	28.39	89.82	121	[180]	1.69	3.04	7.1	3.3	173	0.15	0.62	4.55	0.512964	0.704807				0.258873	0.512759	0.0551736	0.704712									0.704712	0.512759
104	[183]	Comei Province	Nagarze area	DL06-1	Dolerite	28.847	90.415	130	[34]	1.67	8.16	35.2	24.4	556	0.61	2.33		0.51267	0.70492				0.140149	0.512551	0.126936	0.704685									0.704685	0.512551
105	[183]	Comei Province	Gyangze area	JZ1	Basalt	28.92	90.17	130	[34]	1.86	9.74	44.7	14.8	578	0.73	2.9		0.51267	0.70498				0.131733	0.512558	0.0740636	0.704843									0.704843	0.512558
112	[183]	Comei Province	Kangmar area	NR03-1	Dolerite	28.13	90.33	130	[34]	1.94	2.98	8.14	0.18	290	0.12	0.34		0.51293	0.70374				0.22134	0.512742	0.00179512	0.703737									0.703737	0.512742
26	[31]	Comei Province	Lakang Formation	s CN6-1	Dolerite	28	91.9	145	[34]	4.91	8.4	32.4	4.8	445.2	0.3	1.3	3.8	0.512695	0.708727				0.15674	0.512546	0.0311973	0.708663
27	[31]	Comei Province	Lakang Formation	s CN2-1	Dolerite	28	91.9	145	[34]	10.12	6.9	27.1	0.2	213.7	0.3	0.9	30.3	0.512699	0.70935				0.153931	0.512553	0.00270821	0.709344
28	[31]	Comei Province	Lakang Formation	s CN19-1	Dolerite	28	91.9	145	[34]	4.08	8.3	35.1	4.4	400.8	0.5	2	3.4	0.512707	0.705129				0.142961	0.512571	0.0317543	0.705064
29	[31]	Comei Province	Lakang Formation	s CN8-1	Dolerite	28	91.9	145	[34]	4.45	10	42.7	0.5	614.4	0.5	2.4	6.9	0.51272	0.707384				0.141586	0.512586	0.00235446	0.707379
30	[31]	Comei Province	Lakang Formation	s CN20-1	Dolerite	28	91.9	145	[34]	3.9	8	33	24.8	494.5	0.4	2.3	6.6	0.512737	0.705351				0.146563	0.512598	0.145068	0.705052
31	[31]	Comei Province	Lakang Formation	s CN17-3	Basalt	28	91.9	145	[34]	3.62	8.3	33	13.8	1066.2	0.5	1.8	4	0.512751	0.704595				0.15206	0.512607	0.0374365	0.704518
32	[31]	Comei Province	Lakang Formation	s CN14-1	Dolerite	28	91.9	145	[34]	5.98	9.2	40.3	0.6	957.8	0.4	1.8	6.2	0.512763	0.705961				0.138018	0.512632	0.00181213	0.705957
33	[31]	Comei Province	Lakang Formation	s CN24-1	Basalt	28	91.9	145	[34]	5.13	12	50	6.1	157.1	0.7	2.7	8.5	0.512764	0.704785				0.145099	0.512626	0.11231	0.704554
34	[31]	Comei Province	Lakang Formation	s CN1-1	Dolerite	28	91.9	145	[34]	8.88	9.2	37.7	0.4	231.3	0.4	1.7	7.1	0.512775	0.707743				0.147536	0.512635	0.00500349	0.707733
35	[31]	Comei Province	Lakang Formation	s CN13-1	Dolerite	28	91.9	145	[34]	3.29	9.4	37.2	24.6	839	0.4	1.4	9	0.512791	0.705871				0.15277	0.512646	0.0848169	0.705696
36	[31]	Comei Province	Lakang Formation	s CN23-1	Basalt	28	91.9	145	[34]	3.95	9.3	40.7	21.8	528.6	0.5	2	4.8	0.512804	0.703921				0.138148	0.512673	0.119277	0.703675
37	[31]	Comei Province	Lakang Formation	s CN7-1	Dolerite	28	91.9	145	[34]	13.86	9.6	37.9	29.4	307	0.4	1.2	7.4	0.512814	0.709241				0.15314	0.512669	0.277116	0.70867
38	[31]	Comei Province	Lakang Formation	s CN9-1	Dolerite	28	91.9	145	[34]	6.85	10.4	41.7	0.3	427.9	0.2	1.5	5.7	0.512834	0.707705				0.150784	0.512691	0.00202846	0.707701
39	[31]	Comei Province	Lakang Formation	s CN22-3	Basalt	28	91.9	140	[34]	4.3	6	18.6	15	220.1	0.7	3	5.4	0.512739	0.70987				0.195024	0.51256	0.19722	0.709478
40	[31]	Comei Province	Lakang Formation	s CN16-1	Dolerite	28	91.9	132	[34]	2.83	3.6	9.8	1.3	154.1	0.2	0.6	3.5	0.512949	0.705589				0.222099	0.512757	0.0244027	0.705543
41	[31]	Comei Province	Lakang Formation	s CN10-1	Dolerite	28	91.9	132	[34]	3.31	3.4	9.2	3.2	237.6	0.1	0.4	3.7	0.512961	0.705061				0.223441	0.512768	0.0389563	0.704988
42	[31]	Comei Province	Lakang Formation	s CN20-2	Dolerite	28.061	92.366	132	[34]	3.81	3.8	10.4	6.5	203.8	0.1	0.4	6.2	0.512987	0.705149				0.220915	0.512796	0.0922545	0.704976
43	[32]	Comei Province	Sangxiu Formation	s SXII(9)-3	Basalt	28.746	90.715	132	[34]	6.54	9.94	42.64	1.63	273.7	1.39	3		0.512619	0.707788				0.140931	0.512497	0.0172307	0.707756
44	[32]	Comei Province	Sangxiu Formation	s SXII(1)-1	Basalt	28.746	90.715	132	[34]	4.65	10.27	45.45	11.1	196.1	1.88	3.1		0.512688	0.70768				0.136609	0.51257	0.163769	0.707373
45	[32]	Comei Province	Sangxiu Formation	s SXI(1)-1	Basalt	28.746	90.715	132	[34]	4.17	9.92	44.49	1.07	753.4	1.23	4.1			0.709135						0.00410966	0.709127
46	[32]	Comei Province	Sangxiu Formation	s SXI(1)-2	Basalt	28.746	90.715	132	[34]	3.48	10.28	45.57	8.49	387.6	1.31	3.6			0.710024						0.0633883	0.709905
47	[32]	Comei Province	Sangxiu Formation	s SXII(9)-1	Basalt	28.746	90.715	132	[34]	3.21	11.64	52.45	128.9	129.7	1.54	3			0.729021						2.88141	0.723615
48	[176]	Comei Province	Laguila Intrusive Rocks	D1617	Gabbro	28.19	92.22	135	[176]	2.12	25.27	6.58	42.91	918.93	0.43	1.74	4.96	0.512756	0.70667	18.929	15.605	39.079	2.32183	0.510705	0.135089	0.706411	5.5895	0.0405404	23.3736	18.8107	15.5992	38.9224
51	[176]	Comei Province	Laguila Intrusive Rocks	D1620	Gabbro	28.19	92.22	135	[176]	2.01	27.38	7	36.24	733.03	0.5	2.04	3.86	0.512753	0.70579	18.654	15.617	38.804	2.36475	0.510664	0.143012	0.705516	8.29144	0.0601373	34.9592	18.4785	15.6084	38.5697
52	[176]	Comei Province	Laguila Intrusive Rocks	D1631-1	Dolerite	28.19	92.22	133	[176]	2.28	39.09	9.63	33.09	558.9	0.78	3.38	6.04	0.512727	0.70589	18.924	15.702	39.273	2.45407	0.510591	0.171267	0.705566	8.35813	0.0606211	37.4285	18.7498	15.6935	39.0259
55	[178]	Comei Province	Juelongpu	D155h	Basalt	28.45	91.93	140	[178]	6.35	9.7	43.9	28.9	638	0.8	3.2	5.5	0.512645					0.133582	0.512523
57	[178]	Comei Province	Zhaxikang	D730-1h	Basalt	28.37	92.13	139	[178]	7.5	8	32.3	2.5	513	0.5	2.2	3.8	0.512722		18.984	15.707	39.308	0.149739	0.512586			8.52739	0.0618487	38.7739	18.7981	15.6979	39.0404
58	[178]	Comei Province	Zhaxikang	D730-2h	Basalt	28.37	92.13	139	[178]	6.05	7.8	30.9	3.5	602.2	0.5	2	4.2	0.512701					0.152609	0.512562
59	[178]	Comei Province	Zhaxikang	D730-3h	Basalt	28.37	92.13	139	[178]	6.66	6.7	26.7	2.9	786.7	0.4	1.7	3.9	0.512713		18.707	15.584	38.888	0.151709	0.512575			6.57434	0.0476833	28.8743	18.5637	15.577	38.6887
60	[178]	Comei Province	Zhaxikang	D730-4h	Basalt	28.37	92.13	139	[178]	6.46	6.6	25.9	3.5	764.6	0.4	1.7	4.1	0.512712		18.813	15.654	39.101	0.15406	0.512572			6.28644	0.0455952	27.6099	18.676	15.6473	38.9105
61	[178]	Comei Province	Zhaxikang	D730-5h	Basalt	28.37	92.13	139	[178]	7.2	7.7	31.1	2.5	458.1	0.5	2.1	4.8	0.512714		19.066	15.719	39.564	0.149685	0.512578			6.7824	0.0491924	29.4377	18.9182	15.7118	39.3609
62	[179]	Comei Province	Dala area	T0766-1	Dolerite	28.62	92.22	132	[179]	2.3	4.75	18.6	84.7	244	0.65	3.44	4.36	0.51292	0.706864				0.1544	0.512787	1.00426	0.70498
63	[179]	Comei Province	Dala area	T0766-3	Dolerite	28.62	92.22	132	[179]	2.3	4.43	18.1	55.5	342	0.62	3.41	5.09	0.51245	0.707758				0.14796	0.512322	0.469522	0.706877
70	[179]	Comei Province	Dala area	T0766-12	Dolerite	28.62	92.22	132	[179]	2.1	7.24	31	45.1	442	1	5.7	6.26	0.51251	0.707848				0.14119	0.512388	0.295221	0.707294
77	[180]	Comei Province	Gyangze-Kangma area	T0907-1	Dolerite	28.95	89.56	142	[180]	2.6	10.9	52.3	27.8	1015	1.14	4.03	3.99	0.512743	0.70579				0.126001	0.512626	0.079229	0.70563
78	[180]	Comei Province	Gyangze-Kangma area	T0907-2	Dolerite	28.95	89.56	142	[180]	4.6	10.3	47.6	62	820	1.1	3.93	4.62	0.512754	0.7059				0.130822	0.512632	0.21872	0.705459
79	[180]	Comei Province	Gyangze-Kangma area	T0907-3	Dolerite	28.95	89.56	142	[180]	3.6	11.6	54	16.9	381	1.18	4.27	2.52	0.512784	0.705943				0.129873	0.512663	0.128314	0.705684
80	[180]	Comei Province	Gyangze-Kangma area	T0907-4	Dolerite	28.95	89.56	142	[180]	5.65	10.4	48.5	49	619	1.03	3.73	3.27	0.51275	0.706226				0.129641	0.51263	0.228997	0.705764
81	[180]	Comei Province	Gyangze-Kangma area	T0907-5	Dolerite	28.95	89.56	142	[180]	5.78	9.7	44.5	50.1	619	1.01	3.65	3.73	0.512744	0.705824				0.131784	0.512622	0.234128	0.705351
82	[180]	Comei Province	Gyangze-Kangma area	T0902-1	Dolerite	28.95	89.56	138	[180]	8.51	4.6	18.4	20.8	269	0.54	3.05	3.45	0.512492	0.707274				0.151135	0.512356	0.223707	0.706835
83	[180]	Comei Province	Gyangze-Kangma area	T0902-2	Dolerite	28.95	89.56	138	[180]	2.81	5.5	21.9	28.8	353	0.57	3.42	5.76	0.512429	0.707241				0.151822	0.512292	0.23604	0.706778
84	[180]	Comei Province	Gyangze-Kangma area	T0902-3	Dolerite	28.95	89.56	138	[180]	7.84	4.4	16.7	9.5	233	0.51	2.83	3.04	0.512489	0.707225				0.159279	0.512345	0.11796	0.706994
85	[180]	Comei Province	Gyangze-Kangma area	T0902-4	Dolerite	28.95	89.56	138	[180]	7.31	5	19	18.7	232	0.61	3.56	3.44	0.512501	0.707237				0.159089	0.512357	0.233196	0.70678
86	[180]	Comei Province	Gyangze-Kangma area	T0902-5	Dolerite	28.95	89.56	138	[180]	4.72	5.1	21	28.1	458	0.72	3.57	3.72	0.512508	0.707196				0.146817	0.512375	0.177503	0.706848
87	[180]	Comei Province	Gyangze-Kangma area	T0902-6	Dolerite	28.95	89.56	138	[180]	9.68	4.9	19.1	37.3	302	0.53	3.4	8.55	0.512498	0.707379				0.155091	0.512358	0.357335	0.706678
88	[180]	Comei Province	Gyangze-Kangma area	T0904-2	Dolerite	28.39	89.82	121	[180]	2.07	2.9	6.9	4.2	136	0.16	0.62	1.09	0.512836	0.704306				0.254102	0.512635	0.0893209	0.704152
94	[180]	Comei Province	Gyangze-Kangma area	T0901-1	Dolerite	29.07	89.48	130	[34]	3.01	3.57	10.6	2.5	120	0.15	0.65	1.11	0.512899	0.705864				0.203624	0.512726	0.0602653	0.705753
95	[180]	Comei Province	Gyangze-Kangma area	T0901-2	Dolerite	29.07	89.48	130	[34]	3.17	3.77	12.6	1.9	159	0.2	0.92	1.39	0.512927	0.705534				0.1809	0.512773	0.0345662	0.70547
96	[180]	Comei Province	Gyangze-Kangma area	T0901-5	Dolerite	29.07	89.48	130	[34]	3.63	4.57	15.6	0.2	457	0.22	1.05	3.63	0.51289	0.706795				0.177115	0.512739	0.00126608	0.706793
97	[180]	Comei Province	Gyangze-Kangma area	T0901-8	Dolerite	29.07	89.48	130	[34]	8.05	5.2	16.9	0.1	110	0.29	1.22	2.33	0.512903	0.70775				0.18603	0.512745	0.00263024	0.707745
98	[181]	Comei Province	Cona area	CN15-4	Picritic porphyrite	28.36	90.9	130	[34]	7.37	2.31	9.16	4.27	139	0.14	0.63	1.42	0.512712	0.704139				0.152462	0.512582	0.0888482	0.703975
99	[181]	Comei Province	Cona area	CN15-5	Picritic porphyrite	28.36	90.9	130	[34]	7.24	2.54	10	4.44	137	0.16	0.49	1.47	0.51271	0.704184				0.153561	0.512579	0.0937346	0.704011
100	[181]	Comei Province	Cona area	CN15-9	Picritic porphyrite	28.36	90.9	130	[34]	5.5	3.73	15.3	7.31	189	0.23	0.9	1.77	0.512733	0.704195				0.147389	0.512608	0.111865	0.703988
101	[181]	Comei Province	Cona area	CN15-9-2	Picritic porphyrite	28.36	90.9	130	[34]	5.87	3.43	14.4	6.8	172	0.21	0.85	1.82	0.512727	0.704232				0.144006	0.512605	0.114346	0.704021
102	[181]	Comei Province	Cona area	CN15-9-3	Picritic porphyrite	28.36	90.9	130	[34]	5.4	3.69	15.2	6.89	187	0.23	0.96	1.9	0.512724	0.704179				0.146768	0.512599	0.106565	0.703982
103	[181]	Comei Province	Cona area	CN15-7	Basalt	28.36	90.9	130	[34]	2.97	6.18	22.1	15.6	423	0.3	1.52	2.62	0.512698	0.706857				0.16906	0.512554	0.106693	0.70666
106	[183]	Comei Province	Gyangze area	JZ3	Basalt	28.92	90.17	130	[34]	4.26	10.4	46.4	1.34	326	1.08	4.62		0.51269	0.70985				0.135506	0.512575	0.011895	0.709828
107	[183]	Comei Province	Gyangze area	JZ5	Basalt	28.92	90.17	130	[34]	3.59	11.4	54.6	1.9	176	1.19	4.7		0.51268	0.7106				0.126228	0.512573	0.0312429	0.710542
108	[183]	Comei Province	Nagarze area	JZ10	Dolerite	28.87	90.87	130	[34]	2.83	9.52	41.8	1.31	292	1.03	4.19		0.51264	0.71004				0.137689	0.512523	0.012983	0.710016
109	[183]	Comei Province	Nagarze area	JZ14	Diorite	28.87	90.87	130	[34]	3.01	15.3	72.7	46.4	481	1.25	5.13		0.51266	0.70586				0.127233	0.512552	0.27905	0.705344
110	[183]	Comei Province	Gyangze area	KM03-1	Dolerite	28.83	90.1	130	[34]	11.1	3.31	9.5	0.36	381	0.25	0.41		0.5129	0.70725				0.210654	0.512721	0.00273366	0.707245
111	[183]	Comei Province	Puma Yumco area	LZX05-1	Dolerite	28.63	90.92	130	[34]	2.65	3.34	9.3	1.88	380	0.16	0.4		0.51295	0.70565				0.217137	0.512765	0.0143111	0.705624
113	[183]	Comei Province	Nagarze area	YZY03-1	Gabbro	29.05	90.87	130	[34]	3.77	3.07	8.66	0.7	474	0.14	0.39		0.51262	0.70652				0.214317	0.512438	0.00427225	0.706512
114	[184]	Comei Province	Kangma	15KM01-2	Mafic intrusives	28.5	90	117	[184]	4.88	4.82	15.7	2.23	250.23				0.512783	0.705611				0.18561	0.512641	0.0257788	0.705568
115	[184]	Comei Province	Kangma	15KM01-3	Mafic intrusives	28.5	90	117	[184]	4.62	4.67	15	0.71	186.01				0.512794	0.705577				0.188226	0.51265	0.0110413	0.705559
116	[184]	Comei Province	Kangma	15KM01-4	Mafic intrusives	28.5	90	117	[184]	4.16	4.83	15	1.06	275.22				0.512786	0.706291				0.194675	0.512637	0.0111417	0.706272
117	[184]	Comei Province	Kangma	15KM01-5	Mafic intrusives	28.5	90	117	[184]	4.86	4.73	15.4						0.512798					0.185693	0.512656
118	[184]	Comei Province	Kangma	15KM01-6	Mafic intrusives	28.5	90	117	[184]	4.33	4.64	15.4	2	232.94				0.512771	0.705946				0.182159	0.512632	0.0248369	0.705905
119	[184]	Comei Province	Kangma	15KM01-10	Mafic intrusives	28.5	90	117	[184]	3.12	3.07	9						0.512921					0.206236	0.512763
120	[184]	Comei Province	Lazi	15LZ01-4	Mafic intrusives	28.8	87.4	118	[184]	3.36	4.23	12	1.56	152.1				0.512908	0.705519				0.213121	0.512743	0.0296681	0.705469
121	[184]	Comei Province	Lazi	15LZ01-5	Mafic intrusives	28.8	87.4	118	[184]	3.42	3.81	10.5	1.27	151.9				0.512923	0.705139				0.219383	0.512754	0.0241838	0.705098
122	[184]	Comei Province	Lazi	15LZ01-6	Mafic intrusives	28.8	87.4	118	[184]	3.34	4.07	11.8	1.87	140.5				0.512911	0.705566				0.208535	0.51275	0.0385001	0.705501
123	[184]	Comei Province	Lazi	15LZ01-8	Mafic intrusives	28.8	87.4	118	[184]	3.45	3.83	10.4	5.13	120.75				0.512901	0.705079				0.222654	0.512729	0.122887	0.704873
124	[184]	Comei Province	Lazi	15LZ01-9	Mafic intrusives	28.8	87.4	118	[184]	3.39	4.33	12.1	2.44	217				0.512907	0.705199				0.216356	0.51274	0.0325245	0.705144
125	[184]	Comei Province	Lazi	15LZ02-2	Mafic intrusives	28.9	87.6	118	[184]	4.88	5	14.2						0.51287					0.212885	0.512706
126	[184]	Comei Province	Lazi	15LZ02-4	Mafic intrusives	28.9	87.6	118	[184]	4.55	4.02	11.6						0.512846					0.209521	0.512684
127	[184]	Comei Province	Lazi	15LZ02-5	Mafic intrusives	28.9	87.6	118	[184]	4.53	3.23	9.4						0.512867					0.207748	0.512707
128	[184]	Comei Province	Lazi	15LZ02-6	Mafic intrusives	28.9	87.6	118	[184]	4.3	3.63	10.9						0.512852					0.201345	0.512697
129	[184]	Comei Province	Lazi	15LZ04-1	Mafic intrusives	28.9	87.6	118	[184]	3.37	2.57	7.9						0.512839					0.196682	0.512687
130	[184]	Comei Province	Lazi	15LZ04-5	Mafic intrusives	28.9	87.6	118	[184]	3.24	3.2	8.9						0.512856					0.217381	0.512688
131	[184]	Comei Province	Lazi	15LZ04-6	Mafic intrusives	28.9	87.6	118	[184]	3.11
132	[184]	Comei Province	Lazi	15LZ04-9	Mafic intrusives	28.9	87.6	118	[184]	3.3
133	[184]	Comei Province	Lazi	15LZ01-13	Mafic intrusives	28.8	87.4	118	[184]	3.2	8.15	42.4	15.31	44.48				0.511918	0.709786				0.116187	0.511828	0.996061	0.708116
134	[184]	Comei Province	Lazi	15LZ01-14	Mafic intrusives	28.8	87.4	118	[184]	4.03	5.55	30.5						0.511908					0.109991	0.511823
135	[184]	Comei Province	Lazi	15LZ01-15	Mafic intrusives	28.8	87.4	118	[184]	4.39	6.18	32.5	0.2	66.99				0.511919	0.708688				0.11494	0.51183	0.00863871	0.708674
136	[184]	Comei Province	Lazi	15LZ01-16	Mafic intrusives	28.8	87.4	118	[184]	3.83	7.24	38.8	104.9	47.84				0.511887	0.715862				0.11279	0.5118	6.34918	0.705214
137	[184]	Comei Province	Lazi	15LZ01-17	Mafic intrusives	28.8	87.4	118	[184]	3.63	8.26	45.1	62.52	35.04				0.511899	0.714997				0.110705	0.511814	5.16597	0.706334
138	[184]	Comei Province	Lazi	15LZ03-9	Mafic intrusives	28.8	87.4	118	[184]	3.21	6.18	32.2	67.32	46.04				0.511895	0.71553				0.11601	0.511805	4.23378	0.70843
139	[184]	Comei Province	Lazi	15LZ03-10	Mafic intrusives	28.8	87.4	118	[184]	3.15	8.87	47.1	10.15	53.12				0.511919	0.711995				0.113833	0.511831	0.553066	0.711068
623	[16]	Rajmahal-Bengal-Sylhet Traps	Rajmahal Traps	s 2-9-3	Basalt	24.25	87.33	118	[4][18]	0.05	5.32	22.8	30	331		2		0.512344	0.70764	17.96	15.63	38.97	0.141054	0.512235	0.262227	0.7072							17.96	15.63	0.7072	0.512235
624	[16]	Rajmahal-Bengal-Sylhet Traps	Rajmahal Traps	s 1-19-1	Dolerite	24.25	87.33	118	[4][18]	0.57	3.89	12.6	22	316		1		0.512637	0.70833	18.03	15.6	38.48	0.186646	0.512493	0.201442	0.707992							18.03	15.6	0.707992	0.512493
625	[16]	Rajmahal-Bengal-Sylhet Traps	Rajmahal Traps	s 1-19-1_LEACHED	Dolerite	24.25	87.33	118	[4][18]	0.57									0.70821
627	[16]	Rajmahal-Bengal-Sylhet Traps	Rajmahal Traps	s 2-7-7B	Basalt	24.25	87.33	118	[4][18]	0.3	5.633	22.921	35	331		4		0.512305	0.70799	17.97	15.64	39.02	0.148563	0.51219	0.305942	0.707477							17.97	15.64	0.707477	0.51219
628	[16]	Rajmahal-Bengal-Sylhet Traps	Rajmahal Traps	s 2-7-4A	Basalt	24.25	87.33	118	[4][18]	0.35	5.46	22.443	33	328		2		0.512311	0.70793	17.98	15.64	39.03	0.147068	0.512197	0.291096	0.707442							17.98	15.64	0.707442	0.512197
629	[16]	Rajmahal-Bengal-Sylhet Traps	Rajmahal Traps	s 2-7-1	Basalt	24.25	87.33	118	[4][18]	0.24	5.557	22.535	29	358		4		0.512316	0.70831	17.99	15.65	39.07	0.149069	0.512201	0.234384	0.707917							17.99	15.65	0.707917	0.512201
630	[16]	Rajmahal-Bengal-Sylhet Traps	Rajmahal Traps	s 2-7-2	Basalt	24.25	87.33	118	[4][18]	0.25	5.309	21.642	30	339		5		0.512365	0.70773	17.97	15.63	38.98	0.148295	0.512251	0.256041	0.707301							17.97	15.63	0.707301	0.512251
631	[16]	Rajmahal-Bengal-Sylhet Traps	Rajmahal Traps	s 2-7-3	Basalt	24.25	87.33	118	[4][18]	0.16	4.05	15.895	14	337		2		0.512396	0.70658				0.154031	0.512277	0.120181	0.706378									0.706378	0.512277
632	[16]	Rajmahal-Bengal-Sylhet Traps	Rajmahal Traps	s 2-7-5	Basalt	24.25	87.33	118	[4][18]	0.28	4.454	17.281	21	359		1		0.512484	0.70541	17.99	15.58	38.63	0.155813	0.512364	0.169205	0.705126							17.99	15.58	0.705126	0.512364
633	[16]	Rajmahal-Bengal-Sylhet Traps	Rajmahal Traps	s 2-7-7A	Tholeiite / Basalt	24.25	87.33	118	[4][18]	0	3.774	14.952	7.8	387.3		1.6		0.512518	0.70509	18.02	15.59	38.51	0.152591	0.5124	0.0582536	0.704992							18.02	15.59	0.704992	0.5124
634	[16]	Rajmahal-Bengal-Sylhet Traps	Rajmahal Traps	s 2-7-4	Tholeiite / Basalt	24.25	87.33	118	[4][18]	0.14	3.706	14.736	5.7	390.6		2		0.512527	0.70505	18.03	15.59	38.55	0.152038	0.51241	0.0422101	0.704979							18.03	15.59	0.704979	0.51241
637	[16]	Rajmahal-Bengal-Sylhet Traps	Rajmahal Traps	s 1-30-5	Basalt	24.25	87.33	118	[4][18]	0.04	4.008	12.945	3	233		3		0.512735	0.70414	17.93	15.52	38.14	0.187186	0.51259	0.0372392	0.704078							17.93	15.52	0.704078	0.51259
639	[2]	Rajmahal-Bengal-Sylhet Traps	Rajmahal Traps	s JALANGI	Tholeiite, Olivine / Basalt	24.07	88.63	118	[4][18]	1.9	3.9	13.5	2.1	355	0.1	0.5	2.9		0.70828				0.153544		0.017116	0.708251
640	[16]	Rajmahal-Bengal-Sylhet Traps	Rajmahal Traps	s 1-13-1	Tholeiite / Basalt	24.25	87.33	118	[4][18]	0.35	4.629	17.559	17.3	372.9		1.5		0.512599	0.70862	18.01	15.57	38.2	0.159376	0.512476	0.134239	0.708395							18.01	15.57	0.708395	0.512476
641	[2]	Rajmahal-Bengal-Sylhet Traps	Rajmahal Traps	s NADIA	Tholeiite, Quartz / Basalt	23.33	88.5	118	[4][18]	1.5	7.2	25.8	0.7	280	0.38	2.2	3.9		0.70543				0.148325		0.00723153	0.705418
642	[16]	Rajmahal-Bengal-Sylhet Traps	Rajmahal Traps	s 2-26-7 / s 1-26-7	Tholeiite / Basalt	24.25	87.33	118	[4][18]	0.35	4.316	14.312	5.6	237.4		0		0.512727	0.70414	17.93	15.56	38.12	0.182318	0.512586	0.0682249	0.704026							17.93	15.56	0.704026	0.512586
643	[16]	Rajmahal-Bengal-Sylhet Traps	Rajmahal Traps	s 1-12-1	Dolerite	24.25	87.33	118	[4][18]	0.18	4.772	18.166	16	373		1		0.512591	0.7052	17.99	15.56	38.15	0.158809	0.512468	0.124077	0.704992							17.99	15.56	0.704992	0.512468
644	[2]	Rajmahal-Bengal-Sylhet Traps	Rajmahal Traps	s B-1038	Tholeiite, Quartz	23	88	118	[4][18]	1.9	4.9	15	2.2	260	0.12	0.86	3.7		0.70606				0.173623		0.0244775	0.706019
645	[2]	Rajmahal-Bengal-Sylhet Traps	Rajmahal Traps	s A-538	Tholeiite, Quartz / Basalt	23	88	118	[4][18]	0.4	5.1	14.5	9.3	225	0.19	0.9	1.9		0.70394				0.18694		0.119544	0.70374
646	[177]	Rajmahal-Bengal-Sylhet Traps	Rajmahal Traps	1.5	Basaltic flow	25.18	87.625	118	[4][18]	N/A	5.73	22.5	16.7	349	0.43	3.19	5.53	0.51241	0.70777	18.019	15.694	39.28	0.153953	0.512291	0.138446	0.707538	4.97212	0.0360625	38.1184	17.9271	15.6896	39.0568
647	[177]	Rajmahal-Bengal-Sylhet Traps	Rajmahal Traps	2.8	Basaltic flow	25.18	87.625	118	[4][18]	N/A	5.01	19.7	16.5	312	0.34	2.37	4.29	0.51244	0.70657	17.987	15.633	38.949	0.153741	0.512321	0.152992	0.706313	5.0387	0.0365454	36.296	17.8939	15.6285	38.7365
648	[177]	Rajmahal-Bengal-Sylhet Traps	Rajmahal Traps	2.1	Basaltic flow	25.18	87.625	118	[4][18]	N/A	5.15	18.8	18.4	367	0.33	2.16	3.91	0.51239	0.70586	17.944	15.615	38.718	0.165601	0.512262	0.145031	0.705617	5.34445	0.038763	36.1505	17.8453	15.6102	38.5063
649	[177]	Rajmahal-Bengal-Sylhet Traps	Rajmahal Traps	3.8	Basaltic flow	25.18	87.625	118	[4][18]	N/A	4.41	16.6	22	332	0.29	2.04	3.76	0.5124	0.70656	17.997	15.628	38.951	0.1606	0.512276	0.1917	0.706239	4.90397	0.0355682	35.6493	17.9064	15.6236	38.7423
650	[177]	Rajmahal-Bengal-Sylhet Traps	Rajmahal Traps	3.12	Basaltic flow	25.18	87.625	118	[4][18]	N/A	4.41	16.7	17.6	332	0.31	2.14	4.47	0.51233	0.70703	18.412	15.659	39.018	0.159636	0.512207	0.153367	0.706773	4.44013	0.0322041	31.6752	18.33	15.655	38.8325
651	[177]	Rajmahal-Bengal-Sylhet Traps	Rajmahal Traps	3.14	Basaltic flow	25.18	87.625	118	[4][18]	N/A	4.33	16.4	17.6	334	0.29	2.04	3.75	0.51232	0.70665	18.01	15.658	39.01	0.159606	0.512197	0.152443	0.706394	4.92387	0.0357126	35.794	17.919	15.6536	38.8004
652	[177]	Rajmahal-Bengal-Sylhet Traps	Rajmahal Traps	5.3	Basaltic flow	24.8833	87.9167	118	[4][18]	N/A	5.1	19.8	25.1	335	0.38	2.65	5.21	0.51235	0.70768	17.996	15.697	39.136	0.155709	0.51223	0.216778	0.707316	4.65348	0.0337515	33.536	17.91	15.6928	38.9396
653	[177]	Rajmahal-Bengal-Sylhet Traps	Rajmahal Traps	5.4	Basaltic flow	24.8833	87.9167	118	[4][18]	N/A	4.36	12.9	7.04	230	0.14	0.69	1.49	0.51278	0.7036	17.932	15.568	38.095	0.204339	0.512622	0.0885233	0.703452	5.89433	0.0427512	30.0211	17.8231	15.5627	37.9192
654	[177]	Rajmahal-Bengal-Sylhet Traps	Rajmahal Traps	5.6	Basaltic flow	24.8833	87.9167	118	[4][18]	N/A	3.97	12.2	4.97	231	0.14	0.64	1.89	0.51272	0.70406	17.624	15.488	37.636	0.196733	0.512568	0.0622267	0.703956	4.59265	0.0333102	21.6963	17.5392	15.4839	37.509
655	[177]	Rajmahal-Bengal-Sylhet Traps	Rajmahal Traps	5.8	Basaltic flow	24.8833	87.9167	118	[4][18]	N/A	5.88	22.8	32.3	330	0.47	3.38	6.16	0.51224	0.7077	18.027	15.738	40.8	0.155898	0.51212	0.283188	0.707225	4.98283	0.0361402	37.0311	17.935	15.7335	40.5832
656	[177]	Rajmahal-Bengal-Sylhet Traps	Rajmahal Traps	25	Basaltic flow	24.0333	87.6833	118	[4][18]	N/A	4.53	14.1	6.35	247	0.17	0.87	2.73	0.51278	0.70442	18.107	15.598	38.343	0.194237	0.51263	0.0743574	0.704295	3.93079	0.0285098	20.7884	18.0344	15.5945	38.2213
657	[177]	Rajmahal-Bengal-Sylhet Traps	Rajmahal Traps	1	Basaltic flow	24.0333	87.6833	118	[4][18]	N/A	3.73	11.7	3.19	294	0.14	0.67	1.73	0.51267	0.70478	17.759	15.558	38.012	0.192737	0.512521	0.0313838	0.704727	5.05807	0.0366859	25.0151	17.6656	15.5535	37.8655
658	[177]	Rajmahal-Bengal-Sylhet Traps	Rajmahal Traps	6a	Basaltic flow	24.0333	87.6833	118	[4][18]	N/A	4.68	14.2	2.16	240	0.18	0.89	1.94	0.51271	0.70469	17.881	15.572	38.292	0.199253	0.512556	0.0260316	0.704646	5.83265	0.0423039	29.8026	17.7733	15.5668	38.1175
659	[177]	Rajmahal-Bengal-Sylhet Traps	Rajmahal Traps	4.1	Basaltic flow	25.03	87.73	118	[4][18]	N/A	6.91	26.9	32.7	319	0.52	4.36	6.97	0.51238	0.7085	18.053	15.677	39.082	0.155288	0.51226	0.296605	0.708003	4.75882	0.0345155	41.2338	17.9651	15.6727	38.8406
660	[177]	Rajmahal-Bengal-Sylhet Traps	Rajmahal Traps	4.2	Basaltic flow	25.03	87.73	118	[4][18]	N/A	5.92	23.8	23.3	414	0.49	3.69	7.26	0.51228	0.708	17.872	15.675	38.282	0.150365	0.512164	0.162838	0.707727	4.24771	0.0308084	33.0565	17.7935	15.6712	38.0885
661	[177]	Rajmahal-Bengal-Sylhet Traps	Rajmahal Traps	4.11	Basaltic flow	25.03	87.73	118	[4][18]	N/A	4.85	15.9	7.49	246	0.2	0.86	4.61	0.51278	0.70395	17.407	15.51	37.244	0.184416	0.512638	0.0880591	0.703802	2.66782	0.0193496	11.8549	17.3577	15.5076	37.1746
662	[177]	Rajmahal-Bengal-Sylhet Traps	Rajmahal Traps	4.14	Basaltic flow	25.03	87.73	118	[4][18]	N/A	5.06	16	9.76	246	0.2	0.9	3.33	0.51272	0.70465	17.553	15.567	37.607	0.191196	0.512572	0.114755	0.704458	3.72269	0.0270005	17.3117	17.4842	15.5637	37.5056
663	[177]	Rajmahal-Bengal-Sylhet Traps	Rajmahal Traps	4.15	Andesitic flow	25.03	87.73	118	[4][18]	N/A	15.3	90	1189	672	3.12	13.8	25.1	0.5124	0.70602	18.136	15.579	38.197	0.102769	0.512321	5.11833	0.697437	7.83178	0.0568035	35.7978	17.9913	15.572	37.9874
664	[177]	Rajmahal-Bengal-Sylhet Traps	Rajmahal Traps	5.1	Andesite dike	24.8833	87.9167	118	[4][18]	N/A	5.01	18.4	11.3	353	0.34	2.43	4.73	0.51223	0.7076	17.901	15.689	38.964	0.164595	0.512103	0.092616	0.707445	4.56908	0.0331393	33.7464	17.8166	15.6849	38.7664
665	[177]	Rajmahal-Bengal-Sylhet Traps	Rajmahal Traps	5.11	Andesite dike	24.8833	87.9167	118	[4][18]	N/A	5.39	21.2	19.3	353	0.39	2.7	5.15	0.51234	0.70758	17.996	15.711	39.2	0.153696	0.512221	0.158185	0.707315	4.8367	0.0350803	34.6035	17.9067	15.7067	38.9974
666	[177]	Rajmahal-Bengal-Sylhet Traps	Rajmahal Traps	kJ/24	Dolerite dike			118	[4][18]	N/A	6.71	24.3	16.2	203	0.48	2.13	2.86	0.51275	0.70544	17.331	15.416	38.23	0.166942	0.512621	0.230839	0.705053	10.4395	0.0757172	47.8729	17.1381	15.4067	37.9497
667	[177]	Rajmahal-Bengal-Sylhet Traps	Rajmahal Traps	II/L3 S.2	Dolerite dike			118	[4][18]	N/A	4.7	14.5	12.2	326	0.2	1.09	2.11	0.51267	0.7067	18.051	15.546	38.304	0.195962	0.512519	0.108265	0.706518	5.97128	0.0433094	33.6306	17.9407	15.5407	38.1071
635	[16]	Rajmahal-Bengal-Sylhet Traps	Rajmahal Traps	s 1-31-4	Trachyandesite	24.25	87.33	118	[4][18]	3.59	8.202	36.291	97	704		5		0.512252	0.70977	17.99	15.66	39.14	0.136622	0.512147	0.398725	0.709101
636	[2]	Rajmahal-Bengal-Sylhet Traps	Rajmahal Traps	s DEBAGRAM	Basalt, Alkaline / Basalt	23.68	88.3	118	[4][18]	2.5	12.7	54	33	970	0.61	2.8	8.1		0.70439				0.125		0.0983985	0.704225
638	[2]	Rajmahal-Bengal-Sylhet Traps	Rajmahal Traps	s GALSI	Basalt, Alkaline / Basalt	23.45	87.65	118	[4][18]	3.5	13.2	59.8	40	1100	0.71	3.2	8.7		0.70544				0.117321		0.105186	0.705264
668	[12]	Rajmahal-Bengal-Sylhet Traps	Sylhet Traps	CH-1	Basalt	25.2	92.1	118	[4][18]	N/A	4.09	13.6	5.1	334	0.18	0.89	1.21	0.51279	0.70667	18.35	15.595	38.744	0.181819	0.51265	0.044174	0.706596	9.47272	0.0687051	48.402	18.175	15.5865	38.4606
669	[12]	Rajmahal-Bengal-Sylhet Traps	Sylhet Traps	CH-2	Basalt	25.2	92.1	118	[4][18]	N/A	4.5	14.6	2.85	261	0.16	1.25	2.4	0.51256	0.7063	17.977	15.629	38.735	0.186333	0.512416	0.0315887	0.706247	4.22526	0.0306456	34.1126	17.8989	15.6252	38.5353
670	[12]	Rajmahal-Bengal-Sylhet Traps	Sylhet Traps	CH-3	Basalt	25.2	92.1	118	[4][18]	N/A	4.33	13.9	1.31	196	0.13	0.89	1.74	0.51269	0.70479	17.709	15.612	38.197	0.188329	0.512545	0.0193321	0.704758	4.68204	0.0339586	33.1248	17.6225	15.6078	38.0031
671	[12]	Rajmahal-Bengal-Sylhet Traps	Sylhet Traps	CH-4	Basalt	25.2	92.1	118	[4][18]	N/A	7.58	34	12.2	470	0.69	4.85	7.81	0.51232	0.70977	18.048	15.709	39.359	0.134771	0.512216	0.0751167	0.709644	5.65872	0.0410424	41.1038	17.9435	15.7039	39.1183
672	[12]	Rajmahal-Bengal-Sylhet Traps	Sylhet Traps	CH-5	Basalt	25.2	92.1	118	[4][18]	N/A	3.28	10.3	0.44	243	0.15	0.71	1.2	0.51274	0.70457	18.057	15.562	38.121	0.192524	0.512591	0.00523721	0.704561	7.85715	0.0569875	38.4329	17.9119	15.555	37.896
673	[12]	Rajmahal-Bengal-Sylhet Traps	Sylhet Traps	CH-6	Basalt	25.2	92.1	118	[4][18]	N/A	4.97	15.7	3.33	242	0.14	1.02	1.41	0.51247	0.7049	17.91	15.578	38.362	0.191372	0.512322	0.0398012	0.704833	6.25073	0.0453362	47.0624	17.7945	15.5724	38.0864
674	[12]	Rajmahal-Bengal-Sylhet Traps	Sylhet Traps	CH-7	Basalt	25.2	92.1	118	[4][18]	N/A	5.61	17.3	0.65	228	0.16	1.09	2	0.51268	0.70451	17.907	15.541	38.194	0.196047	0.512529	0.00824574	0.704496	5.02188	0.0364235	35.3545	17.8142	15.5365	37.987
675	[12]	Rajmahal-Bengal-Sylhet Traps	Sylhet Traps	CH-7A	Basalt	25.2	92.1	118	[4][18]	N/A	5.49	16.8	3.07	224	0.21	1.12	2.07	0.51281	0.70427	17.896	15.555	38.345	0.197569	0.512657	0.0396398	0.704204	6.38189	0.0462875	35.1738	17.7781	15.5493	38.1391
676	[12]	Rajmahal-Bengal-Sylhet Traps	Sylhet Traps	CH-8	Basalt	25.2	92.1	118	[4][18]	N/A	2.26	7.5	5.5	214	0.11	0.53	0.64	0.51278	0.70461	18.288	15.575	38.683	0.18218	0.512639	0.0743369	0.704485	10.9234	0.0792268	54.3891	18.0862	15.5652	38.3645
677	[12]	Rajmahal-Bengal-Sylhet Traps	Sylhet Traps	CH-8A	Basalt	25.2	92.1	118	[4][18]	N/A	2.43	7.98	2.52	229	0.12	0.57	1.21	0.51277	0.70459	17.803	15.561	37.965	0.184101	0.512628	0.0318288	0.704537	6.19863	0.0449583	30.4271	17.6885	15.5555	37.7868
678	[12]	Rajmahal-Bengal-Sylhet Traps	Sylhet Traps	CH-9	Basalt	25.2	92.1	118	[4][18]	N/A	2.2	6.89	3.08	103	0.08	0.42	0.91	0.51267	0.70574	18.101	15.577	38.79	0.193039	0.512521	0.0865002	0.705595	5.58138	0.0404815	30.2811	17.9979	15.572	38.6127
679	[12]	Rajmahal-Bengal-Sylhet Traps	Sylhet Traps	CH-10	Basalt	25.2	92.1	118	[4][18]	N/A	5.64	18.4	2.87	205	0.28	1.4	1.87	0.51279	0.70454	18.28	15.57	38.807	0.185317	0.512647	0.0404931	0.704472	9.53058	0.0691248	49.2448	18.1039	15.5615	38.5187
680	[12]	Rajmahal-Bengal-Sylhet Traps	Sylhet Traps	CH-11	Basalt	25.2	92.1	118	[4][18]	N/A	4.86	15.6	8.08	254	0.11	0.94	1.7	0.51274	0.7053	17.89	15.587	38.353	0.188348	0.512595	0.0920158	0.705146	4.07237	0.0295367	35.9628	17.8148	15.5834	38.1424
681	[12]	Rajmahal-Bengal-Sylhet Traps	Sylhet Traps	MB-1	Basalt	25.2	91.7	118	[4][18]	N/A	4.83	13.2	9.52	266	0.2	1.08	3.24	0.51222	0.70715	17.634	15.498	38.285	0.221192	0.512049	0.103543	0.706976	3.86302	0.0280183	21.5571	17.5626	15.4945	38.1588
682	[12]	Rajmahal-Bengal-Sylhet Traps	Sylhet Traps	MB-2	Basalt	25.2	91.7	118	[4][18]	N/A	8.02	33.2	37.5	258	0.73	7.35	11.7	0.51224	0.71364	18.153	15.699	39.243	0.146027	0.512127	0.420776	0.712934	3.9951	0.0289763	41.5684	18.0792	15.6954	38.9996
683	[12]	Rajmahal-Bengal-Sylhet Traps	Sylhet Traps	MB-3	Basalt	25.2	91.7	118	[4][18]	N/A	5.29	19.9	32.2	252	0.31	3.1	5.56	0.51222	0.70998	17.957	15.667	39.19	0.160694	0.512096	0.369776	0.70936	3.55659	0.0257957	36.754	17.8913	15.6638	38.9748
684	[12]	Rajmahal-Bengal-Sylhet Traps	Sylhet Traps	MB-4	Basalt	25.2	91.7	118	[4][18]	N/A	9.5	42.7	35.7	344	0.83	4.83	6.51	0.51234	0.70694	17.915	15.518	38.243	0.134494	0.512236	0.300237	0.706437	8.00715	0.0580754	48.1524	17.7671	15.5108	37.9611
685	[12]	Rajmahal-Bengal-Sylhet Traps	Sylhet Traps	MB-5	Basalt	25.2	91.7	118	[4][18]	N/A	5.45	20.5	29.5	281	0.31	3.18	5.45	0.51224	0.71551	17.944	15.675	39.172	0.160709	0.512116	0.303972	0.715	3.62724	0.0263082	38.4515	17.877	15.6718	38.9469
534	[26]	Naturaliste Plateau	DSDP Leg 28, Site 264 (Southeastern Sector)	s DSDP264-15CC	Andesite	-34.84	112.32	128	[185][186]	N/A	1.725	7.786	25.263	262.7				0.511934		18.105	15.175	39.3	0.133919	0.511822
535	[20]	Naturaliste Plateau	DSDP Leg 28, Site 264 (Southeastern Sector)	s DSDP264-15CC_LEACHED	Andesite	-34.84	112.32	128	[185][186]	N/A	1.725	7.786	26.3	262.7			5.5	0.511922	0.713401	18.087	15.701	39.22	0.133918	0.511809	0.289817	0.712874
536	[20]	Naturaliste Plateau	Eltanin 55, Dredge 12 (Northwestern Sector)	s EL55-12-2_LEACHED	Tholeiite	-32.95	110.81	128	[185][186]	N/A	1.332	5.219	46.7	151.8			3.75	0.51194	0.714315	17.787	15.616	38.629	0.154271	0.51181	0.890662	0.712695
537	[20][27]	Naturaliste Plateau	Eltanin 55, Dredge 12 (Northwestern Sector)	s EL5512-7 / s EL55-12-7_UNLEACHED	Tholeiite	-32.95	110.81	128	[185][186]	N/A	3.89	13.21	19.3	126.8		1.62	3.03	0.512196	0.710481	17.97	15.64	38.574	0.178008	0.512046	0.440497	0.709679
538	[20][27]	Naturaliste Plateau	Eltanin 55, Dredge 12 (Northwestern Sector)	s EL5512-8 / s EL55-12-8_UNLEACHED	Tholeiite	-32.95	110.81	128	[185][186]	N/A	4.115	13.6	15.6	142.7		1.87	3.12	0.51224	0.71027	17.95	15.626	38.51	0.182906	0.512086	0.316371	0.709695
544	[20]	Naturaliste Plateau	Eltanin 55, Dredge 12 (Northwestern Sector)	s EL55-12-8_LEACHED	Tholeiite	-32.95	110.81	128	[185][186]	N/A			5.66	132.6			2.43			17.909	15.609	38.433
545	[20]	Naturaliste Plateau	Eltanin 55, Dredge 12 (Northwestern Sector)	s EL55-12-7_LEACHED	Tholeiite	-32.95	110.81	128	[185][186]	N/A			6.36	133.8			2.73			17.914	15.635	38.477
539	[20]	Naturaliste Plateau	Eltanin 55, Dredge 12 (Northwestern Sector)	s EL55-12-24_LEACHED	Tholeiite	-32.95	110.81	128	[185][186]	2.22	0.4664	0.8168	7.38	156.9			0.33	0.512942	0.704128	17.849	15.513	37.674	0.345233	0.512653	0.136041	0.703881
540	[20]	Naturaliste Plateau	Eltanin 55, Dredge 12 (Northwestern Sector)	s EL55-12-21 / s EL55-12-21_UNLEACHED	Tholeiite	-32.95	110.81	128	[185][186]	2.04	1.289	3.014	11.6	168.3			0.42	0.512856	0.70471	17.982	15.53	37.757	0.258566	0.51264	0.199358	0.704347
541	[20]	Naturaliste Plateau	Eltanin 55, Dredge 12 (Northwestern Sector)	s EL55-12-24 / s EL55-12-24_UNLEACHED	Tholeiite	-32.95	110.81	128	[185][186]	2.22	0.7173	1.576	13.8	166.4				0.512872	0.704279				0.275174	0.512642	0.239865	0.703843
542	[20]	Naturaliste Plateau	Eltanin 55, Dredge 12 (Northwestern Sector)	s EL55-12-21_LEACHED	Tholeiite	-32.95	110.81	128	[185][186]	2.04	0.4362	0.7652	9.18	133.3			0.18	0.512942	0.70429	17.96	15.517	37.694	0.344652	0.512653	0.199184	0.703928
543	[20]	Naturaliste Plateau	Eltanin 55, Dredge 12 (Northwestern Sector)	s EL55-12-25_LEACHED	Tholeiite	-32.95	110.81	128	[185][186]	2.27	0.517	0.8865	6.92	166.8			0.33	0.512972	0.704145	17.817	15.502	37.654	0.352602	0.512677	0.11999	0.703926
546	[186]	Naturaliste Plateau	Naturaliste Plateau	s 3.2	Basalt	-34.7681	113.648	130	[186]	2.67	12.72	54.34	85.6	478.4	0.72	1.78	10.91	0.512221	0.713171	17.618	15.671	38.253	0.141502	0.512101	0.517967	0.712214	4.13711	0.0300062	10.5695	17.5337	15.6669	38.1848
547	[186]	Naturaliste Plateau	Naturaliste Plateau	s 7-5 LP	Dolerite	-34.8859	112.941	130	[186]	2.38	10.66	42.35	50.2	213	0.86	5.4	13.03	0.512134	0.714781	17.822	15.684	38.654	0.152157	0.512005	0.682357	0.71352	4.17281	0.0302652	27.0767	17.737	15.6799	38.4793
548	[186]	Naturaliste Plateau	Naturaliste Plateau	s 7-5 HP	Dolerite	-34.8859	112.941	130	[186]	2.38	10.66	42.35	50.2	213	0.86	5.4	13.03	0.512121	0.714607	17.817	15.68	38.633	0.152156	0.511992	0.682345	0.713346	4.1711	0.0302528	27.0655	17.732	15.6759	38.4584
549	[186]	Naturaliste Plateau	Naturaliste Plateau	s 7.11	Basalt	-34.8859	112.941	130	[186]	2.55	3.51	10.75	1.99	191.2	0.23	1.15	4.26	0.512369	0.707639	17.793	15.637	38.464	0.197383	0.512201	0.0301127	0.707583	3.40101	0.0246674	17.5731	17.7237	15.6336	38.3506
550	[186]	Naturaliste Plateau	Naturaliste Plateau	s 10-39	Dolerite/Gabbro	-35.0357	112.224	132	[186]	2.77	4.74	14.11	10.34	253.4	0.23	0.61	4.23	0.512858	0.70383	18.327	15.602	38.186	0.203101	0.512683	0.118015	0.703609	3.43532	0.0249162	9.41543	18.2559	15.5985	38.1243
551	[186]	Naturaliste Plateau	Naturaliste Plateau	s 11-9	Basalt	-35.1013	111.983	129	[186]	2.08	11.38	49.57	77.3	290	0.56	3.93	15.9	0.512087	0.712857	17.277	15.592	38.15	0.138773	0.51197	0.771591	0.711442	2.19204	0.0158987	15.8973	17.2327	15.5898	38.0482
552	[186]	Naturaliste Plateau	Naturaliste Plateau	s 11-9	Basalt	-35.1013	111.983	129	[186]	2.08	11.38	49.57	77.3	290	0.56	3.93	15.9	0.512094	0.712846	17.29	15.588	38.151	0.138774	0.511977	0.77159	0.711431	2.19234	0.0159009	15.8995	17.2457	15.5858	38.0492
553	[186]	Naturaliste Plateau	Naturaliste Plateau	s 12.20	Dolerite	-35.0489	111.724	131	[186]	3.82	5.93	22.11	71.9	224.1	0.44	3.04	4.61	0.512309	0.711437	17.727	15.622	38.989	0.162133	0.51217	0.928608	0.709708	6.04913	0.043874	43.1902	17.6028	15.616	38.7082
554	[186]	Naturaliste Plateau	Naturaliste Plateau	s 13.7	Dolerite	-35.0211	111.611	130	[186]	2.89	1.83	5.57	12.12	158.5	0.15	0.22	0.45	0.512816	0.704974	17.867	15.597	38.146	0.198634	0.512647	0.221179	0.704565	20.9153	0.151698	31.7005	17.4409	15.5763	37.9415
555	[186]	Naturaliste Plateau	Naturaliste Plateau	s 20.1	Basalt	-35.0926	110.315	130	[186]	2.54	5.64	24.14	71.1	181.7	0.69	5.95	7.14	0.512226	0.713197	17.885	15.664	39.267	0.141234	0.512106	1.13275	0.711104	6.16472	0.0447124	54.9354	17.7594	15.6579	38.9125
152	[37][36]	Heard Island	Big Ben Series	s H10	Basanite	-53.12	73.5	1	[43]	1.9	10.3	51.4	46.89	955		6		0.512618	0.705234	18.189	15.566	38.646	0.121147	0.512617	0.142023	0.705232							18.189	15.566	0.705232	0.512617
153	[37][54]	Heard Island	Big Ben Series	s H61	Basanite	-53.12	73.5	1	[43]	0.59	5.29	23.9	24.15	415		4		0.512648	0.705345				0.133813	0.512647	0.168328	0.705343									0.705343	0.512647
149	[37][54][36]	Heard Island	Big Ben Series	s 65085	Basalt	-53.12	73.5	1	[43]	N/A	7.64	36.42	40	589	0	5	3	0.512604	0.705484	18.11	15.564	38.59	0.12682	0.512603	0.196443	0.705481
140	[37]	Heard Island	Big Ben Series	s 69289	Basanite	-53.12	73.5	1	[43]	N/A			39	607		3		0.512602	0.705313						0.185849	0.70531
141	[37]	Heard Island	Big Ben Series	s 65001	Basanite	-53.12	73.5	1	[43]	N/A	11.1	52.8	44	800		6		0.51263	0.705335				0.127095	0.512629	0.159092	0.705333
142	[37]	Heard Island	Big Ben Series	s 65183	Basalt, Basanitic	-53.12	73.5	1	[43]	N/A			62	979		10		0.512642	0.705313	18.136	15.556	38.575			0.183187	0.70531
143	[37]	Heard Island	Big Ben Series	s HC27	Basalt	-53.12	73.5	1	[43]	N/A			43	600				0.512592	0.705341						0.207302	0.705338
144	[37]	Heard Island	Big Ben Series	s 69287	Basalt, Basanitic	-53.12	73.5	1	[43]	N/A			70	814		6		0.512527	0.705518						0.248753	0.705514
145	[37]	Heard Island	Big Ben Series	s 65082	Trachyandesite	-53.12	73.5	1	[43]	N/A	11.9	61.8	65.3	997		7		0.512569	0.705648				0.11641	0.512568	0.18946	0.705645
146	[37]	Heard Island	Big Ben Series	s 65030	Basalt	-53.12	73.5	1	[43]	N/A			40	543		5		0.512537	0.705814	17.958	15.568	38.473			0.213092	0.705811
147	[37]	Heard Island	Big Ben Series	s HE43	Trachyandesite	-53.12	73.5	1	[43]	N/A			63	772				0.51252	0.705969	17.913	15.559	38.412			0.236068	0.705966
148	[37]	Heard Island	Big Ben Series	s 65104	Trachybasalt	-53.12	73.5	1	[43]	N/A			54	616		6		0.512483	0.706115	17.932	15.56	38.471			0.25359	0.706111
150	[37][54]	Heard Island	Big Ben Series	s 65143	Basalt	-53.12	73.5	1	[43]	N/A	8.86	45	49.28	638		9		0.512549	0.705676				0.119029	0.512548	0.223435	0.705673
151	[37][54][36]	Heard Island	Big Ben Series	s 65151	Trachybasalt	-53.12	73.5	1	[43]	N/A	9.84	47.7	52	604		7		0.512508	0.705995	17.953	15.55	38.42	0.12471	0.512507	0.249047	0.705991
154	[37]	Heard Island	Drygalski Formation	s 65069	Trachybasalt	-53.12	73.33	1	[43]	N/A	9.61	45	60.4	1234		6		0.512652	0.705473				0.129107	0.512651	0.141584	0.705471
155	[68]	Heard Island	Heard Island	s BM1967,P9	Basalt, Alkaline	-53.12	73.33	1	[43]	N/A	8.9	45	34	635	0.816	3.4		0.512597	0.70541				0.119567	0.512596	0.15488	0.705408
156	[68]	Heard Island	Heard Island	s BM64986	Basalt, Alkaline	-53.12	73.33	1	[43]	N/A	10.7	54	57	845	1.195	5.6		0.512582	0.70555	18.009	15.547	38.461	0.119791	0.512581	0.195125	0.705547
157	[68]	Heard Island	Heard Island	s BM64992	Basalt, Alkaline	-53.12	73.33	1	[43]	N/A	11.9	58	45	839	1.03	5.3			0.70575	17.993	15.559	38.511	0.109049		0.155151	0.705748
158	[37]	Heard Island	Laurens Peninsula Series	s 69245	Basanite	-53.12	73.33	1	[43]	N/A			80	1013		11		0.512706	0.704859						0.228427	0.704856
159	[36]	Heard Island	Laurens Peninsula Series	s 65054	Trachyandesite	-53.12	73.33	1	[43]	N/A				1189				0.51272	0.704804	18.656	15.577	38.98			0	0.704804
160	[36]	Heard Island	Laurens Peninsula Series	s 69244	Basanite	-53.12	73.33	1	[43]	N/A				939				0.512705	0.704862	18.776	15.588	39.17			0	0.704862
161	[37][54]	Heard Island	Laurens Peninsula Series	s 65254	Basanite	-53.12	73.33	1	[43]	N/A			76	960		10		0.512729	0.704728	18.832	15.601	39.27			0.228983	0.704725
162	[37][54][36][77]	Heard Island	Mawson Peak	s 65171	Trachybasalt / Basanite	-53.12	73.5	1	[43]	N/A	11	55.9	57.8	818	2.03	9		0.512581	0.705321	18.211	15.567	38.508	0.118964	0.51258	0.20439	0.705318
222	[42]	Kerguelen Archipelago	Mont Des Ruches	s BY96-38	Basalt	-48.87	68.96	28	[82]	0.64	3.48	14.14	9.2	232	0.24	1.18	1.09	0.512665	0.70502	18.331	15.535	38.88	0.148789	0.512638	0.114702	0.704974	14.0318	0.101772	71.2941	18.2699	15.5322	38.7812	18.2699	15.5322	0.704974	0.512638
228	[42]	Kerguelen Archipelago	Mont Des Ruches	s BY96-24	Basalt	-48.87	68.96	28	[82]	1.75	3.24	14.37	15.7	284	0.33	1.65	1.69	0.512643	0.705069	18.219	15.526	38.81	0.13631	0.512618	0.159903	0.705005	12.4117	0.0900213	64.1316	18.165	15.5235	38.7211	18.165	15.5235	0.705005	0.512618
230	[42][59]	Kerguelen Archipelago	Mont Des Ruches	s BY96-31	Basalt / Basalt, Transitional	-48.87	68.96	28	[82]	1.82	7.87	33.5	18.2	352	0.56	3.1	1.69	0.512588	0.705416	18.349	15.5514	39.0013	0.142025	0.512562	0.149561	0.705357	21.1615	0.153483	121.057	18.2569	15.5471	38.8335	18.2569	15.5471	0.705357	0.512562
238	[42]	Kerguelen Archipelago	Mont Fontaine	s BY96-90	Basalt	-48.85	69.13	28	[82]	1.06	3.99	16.26	7.9	337	0.2	1.02	1.68	0.512746	0.704736	18.342	15.535	38.78	0.148355	0.512719	0.0678044	0.704709	7.57742	0.0549586	39.9358	18.309	15.5335	38.7246	18.309	15.5335	0.704709	0.512719
243	[42]	Kerguelen Archipelago	Mont Fontaine	s BY96-101	Basalt	-48.85	69.13	28	[82]	1.58	8.43	36.04	21.5	368	0.67	2.87	2.98	0.512706	0.704744	18.448	15.523	38.83	0.141413	0.51268	0.168986	0.704677	14.3385	0.103997	63.4721	18.3856	15.5201	38.742	18.3856	15.5201	0.704677	0.51268
244	[42]	Kerguelen Archipelago	Mont Fontaine	s BY96-80	Basalt	-48.85	69.13	28	[82]	1.45	4.48	20.42	17	419	0.39	2.11	1.78	0.512693	0.704881	18.36	15.561	38.9	0.132638	0.512669	0.117355	0.704834	13.977	0.101374	78.1451	18.2992	15.5582	38.7917	18.2992	15.5582	0.704834	0.512669
237	[42]	Kerguelen Archipelago	Mont Fontaine	s BY96-87	Basalt	-48.85	69.13	28	[82]	1.21	3.41	12.23	3	204	0.11	0.44	1.06	0.512751	0.704435				0.168569	0.51272	0.0425343	0.704418									0.704418	0.51272
250	[49]	Kerguelen Archipelago	Kerguelen Archipelago	s MM94-401	Basalt	-48.55	68.5	26	[70]	1.4			12	824			0	0.512648	0.705122						0.0421242	0.705106
283	[78]	Kerguelen Archipelago	Mount Capitole	s 93-490	Basalt	-48.55	68.5	26	[70]	1.53								0.51269	0.705039	18.3906	15.552	38.8299											18.3906	15.552	0.705039	0.51269
284	[78]	Kerguelen Archipelago	Mount Capitole	s 93-512	Basalt	-48.55	68.5	26	[70]	0.43								0.512706	0.704803	18.4451	15.5487	38.9004											18.4451	15.5487	0.704803	0.512706
268	[78]	Kerguelen Archipelago	Mount Capitole	s 93-459	Basalt	-48.55	68.5	26	[70]	1.36	4.2	18.2	7.97	410	0.321	1.83	1.43	0.512685	0.704835	18.4418	15.5512	38.9699	0.139515	0.512661	0.0562263	0.704814	14.3473	0.10406	84.5253	18.3838	15.5485	38.8611	18.3838	15.5485	0.704814	0.512661
269	[78]	Kerguelen Archipelago	Mount Capitole	s 93-463	Basalt	-48.55	68.5	26	[70]	1.62	4.44	18.6	8.47	331	0.298	1.59	1.35	0.512967	0.704832	18.3973	15.5398	38.8821	0.144325	0.512942	0.0740151	0.704805	14.0812	0.10213	77.6408	18.3404	15.5372	38.7822	18.3404	15.5372	0.704805	0.512942
273	[78]	Kerguelen Archipelago	Mount Capitole	s 93-476	Basalt	-48.55	68.5	26	[70]	1.95	7.09	30.1	6.33	323	0.648	3.02	2.23	0.512686	0.704913	18.3954	15.5449	38.8748	0.142404	0.512662	0.0566852	0.704892	18.5354	0.134436	89.2698	18.3205	15.5414	38.7599	18.3205	15.5414	0.704892	0.512662
274	[78]	Kerguelen Archipelago	Mount Capitole	s 93-479	Basalt	-48.55	68.5	26	[70]	1.66	7.96	33	8.86	323	0.555	2.97	2.28	0.512717	0.704783	18.4721	15.5505	38.9155	0.14583	0.512692	0.0793403	0.704754	15.5529	0.112804	86.0093	18.4092	15.5476	38.8048	18.4092	15.5476	0.704754	0.512692
275	[78]	Kerguelen Archipelago	Mount Capitole	s 93-482	Basalt	-48.55	68.5	26	[70]	1.4	7.8	31.8	5.35	297	0.526	2.83	2.21	0.512728	0.704716	18.4562	15.5488	38.8762	0.148291	0.512703	0.0521023	0.704697	15.1954	0.110211	84.4857	18.3948	15.5459	38.7675	18.3948	15.5459	0.704697	0.512703
276	[78]	Kerguelen Archipelago	Mount Capitole	s 93-483	Basalt	-48.55	68.5	26	[70]	1.17	8.99	37.2	14.1	347	0.661	3.27	2.42	0.512714	0.704776	18.4386	15.552	38.8991	0.146104	0.512689	0.117531	0.704733	17.4404	0.126494	89.1605	18.3681	15.5487	38.7843	18.3681	15.5487	0.704733	0.512689
277	[78]	Kerguelen Archipelago	Mount Capitole	s 93-490	Basalt	-48.55	68.5	26	[70]	1.53	7.15	29.4	4.58	344	0.518	2.7	2.03	0.512694	0.705046	18.3769	15.5514	38.8102	0.147029	0.512669	0.0385107	0.705032	16.2597	0.117931	87.5828	18.3112	15.5483	38.6975	18.3112	15.5483	0.705032	0.512669
278	[78]	Kerguelen Archipelago	Mount Capitole	s 93-495	Basalt	-48.55	68.5	26	[70]	0.4	6.92	28.5	12.7	340	0.603	2.61	1.94	0.512722	0.70477	18.4618	15.5553	38.8682	0.146794	0.512697	0.108041	0.70473	19.8453	0.143937	88.767	18.3816	15.5516	38.7539	18.3816	15.5516	0.70473	0.512697
279	[78]	Kerguelen Archipelago	Mount Capitole	s 93-507	Basalt	-48.55	68.5	26	[70]	1.27	8.37	35	19.6	322	0.789	3.35	2.75	0.512706	0.704841	18.42	15.5407	38.8488	0.144578	0.512681	0.176062	0.704776	18.2996	0.132726	80.2935	18.346	15.5373	38.7454	18.346	15.5373	0.704776	0.512681
280	[78]	Kerguelen Archipelago	Mount Capitole	s 93-512	Basalt	-48.55	68.5	26	[70]	0.43	6.68	27.9	8.98	327	0.583	2.75	2.1	0.512717	0.70479	18.4382	15.5421	38.88	0.14475	0.512692	0.0794313	0.704761	17.7193	0.128517	86.3735	18.3666	15.5388	38.7688	18.3666	15.5388	0.704761	0.512692
288	[50]	Kerguelen Archipelago	Courbet Peninsula	s 77-128	Basalt, Alkaline	-48.55	68.5	25	[70]	1.9	5.68	24.87	23	460		3.36		0.51262	0.70509				0.138073	0.512597	0.144626	0.705039									0.705039	0.512597
285	[8]	Kerguelen Archipelago	Armor	s AG99-41	Basalt, Alkaline	-49.48	69.67	25	[70]	-0.04	6.1	30.7	26.6	597	0.9	3.8	2	0.512634	0.705214	18.4269	15.5513	38.9935	0.120124	0.512614	0.128881	0.705168	28.7651	0.208632	125.51	18.3151	15.5461	38.8382	18.3151	15.5461	0.705168	0.512614
286	[8]	Kerguelen Archipelago	Armor	s AG99-125	Basalt, Transitional	-49.35	69.89	25	[70]	1.24	4.2	17	11.1	289	0.3	1.6	1	0.512646	0.705216	18.3139	15.5288	38.7934	0.149362	0.512622	0.111098	0.705177	19.0897	0.138457	105.213	18.2397	15.5253	38.6632	18.2397	15.5253	0.705177	0.512622
298	[8]	Kerguelen Archipelago	Kerguelen Archipelago	s AG99-123	Picrite	-49.35	69.89	25	[70]	1.12	3.9	16.1	12	265	0.3	1.5	2	0.512655	0.705213	18.3306	15.531	38.8006	0.146447	0.512631	0.130983	0.705166	9.54824	0.0692528	49.336	18.2935	15.5293	38.7395	18.2935	15.5293	0.705166	0.512631
299	[8]	Kerguelen Archipelago	Kerguelen Archipelago	s AG99-122	Basalt, Transitional	-49.35	69.89	25	[70]	0.85	5.2	23.2	20.9	359	0.6	2.4	2	0.512628	0.705124	18.4617	15.5482	39.0509	0.135504	0.512606	0.168395	0.705064	19.1998	0.139255	79.3649	18.3871	15.5447	38.9527	18.3871	15.5447	0.705064	0.512606
300	[8]	Kerguelen Archipelago	Kerguelen Archipelago	s AG99-124	Basalt, Alkaline	-49.35	69.89	25	[70]	1.51	7.3	35.7	26.3	549	0.9	4.2	2	0.512656	0.70509	18.6769	15.5694	39.2661	0.123622	0.512636	0.138567	0.705041	28.9752	0.210155	139.735	18.5643	15.5642	39.0932	18.5643	15.5642	0.705041	0.512636
331	[50]	Kerguelen Archipelago	Plateau Central	s 85-12	Basalt, Transitional	-48.55	68.5	25	[70]	1.43	5.47	23.49	12	380	0.43	2.01	1.64	0.51273	0.70488	18.377	15.539	38.813	0.140784	0.512707	0.0913408	0.704848	16.7051	0.121161	80.6951	18.3121	15.536	38.7131	18.3121	15.536	0.704848	0.512707
332	[50]	Kerguelen Archipelago	Plateau Central	s 85-55	Basalt, Transitional	-48.55	68.5	25	[70]	1.72	6.24	31.52		349	0.5	2.49	1.98	0.51275	0.70483	18.467	15.528	38.817	0.119687	0.51273	0	0.70483	16.107	0.116823	82.8924	18.4044	15.5251	38.7144	18.4044	15.5251	0.70483	0.51273
345	[50][64]	Kerguelen Archipelago	Mont Chateau	s 77-211	Basalt, Alkaline / Basalt	-48.55	68.5	24	[51]	1.55	5.2	24.21	19	362	0.5	2.57	1.85	0.51262	0.70508	18.444	15.565	39.007	0.129851	0.5126	0.151817	0.705028	17.2867	0.125379	91.8217	18.3795	15.562	38.8979	18.3795	15.562	0.705028	0.5126
346	[8]	Kerguelen Archipelago	Mont Trapeze	s AG99-182	Basalt, Transitional	-49.3	70.06	24	[70]	1.49	5.6	26.3	27.5	406	0.7	3.2	2	0.512653	0.705233	18.4051	15.5492	38.9448	0.128728	0.512633	0.195924	0.705166	22.3509	0.16211	105.589	18.3217	15.5453	38.8193	18.3217	15.5453	0.705166	0.512633
361	[51][75]	Kerguelen Archipelago	Val Gabbro Plutonic Suite	s K90	Gabbro / Gabbro, Clinopyroxene-Olivine	-48.55	68.5	24	[67]	1.55			11.5	495	0.34		1.92	0.51266	0.70526	18.463	15.563	39.032			0.067201	0.705237	11.3328	0.0821962	0	18.4207	15.561	39.032	18.4207	15.561	0.70526	0.51266
379	[74]	Kerguelen Archipelago	Ronarch Peninsula	s ARC156	Basanite	-48.55	68.5	10	[74]	1.44	11.5	68.3	40.8	1125	2.2	12.3	5.9	0.51251	0.72386	18.05	15.556	38.63	0.101789	0.512503	0.105095	0.723845	23.5987	0.17116	136.346	18.0134	15.5543	38.5625	18.0134	15.5543	0.723845	0.512503
381	[8]	Kerguelen Archipelago	Aubert de La Rue	s AG99-34	Picrite	-49.9	69.64	1	[74]	1.69	4.1	18.4	15.3	249	0.4	1.9	2	0.512606	0.705217	18.4834	15.5459	39.1039	0.134711	0.512605	0.177735	0.705214	12.8124	0.0929278	62.892	18.4814	15.5458	39.1008	18.4814	15.5458	0.705214	0.512605
382	[8]	Kerguelen Archipelago	Aubert de La Rue	s AG99-35	Basalt, Alkaline	-49.9	69.64	1	[74]	1.57	7.6	37.4	17.3	602	1	4.7	3	0.512588	0.705243	18.3578	15.5472	38.8598	0.12285	0.512587	0.0831251	0.705242	21.2479	0.15411	103.201	18.3545	15.547	38.8547	18.3545	15.547	0.705242	0.512587
383	[8]	Kerguelen Archipelago	Aubert de La Rue	s AG99-36	Picrite	-49.9	69.64	1	[74]	1.71	4	18.7	17.3	528	0.5	1.9	2	0.512605	0.705232	18.404	15.5352	38.9848	0.129316	0.512604	0.0947751	0.705231	15.9703	0.115832	62.7146	18.4015	15.5351	38.9817	18.4015	15.5351	0.705231	0.512604
384	[8]	Kerguelen Archipelago	Aubert de La Rue	s AG99-37	Basalt, Alkaline	-49.9	69.64	1	[74]	0.74	7.1	34.2	39.2	732	0.9	3.6	2	0.512586	0.705247	18.4394	15.5487	39.0336	0.125506	0.512585	0.154902	0.705245	28.7846	0.208773	118.985	18.4349	15.5485	39.0277	18.4349	15.5485	0.705245	0.512585
385	[8]	Kerguelen Archipelago	Aubert de La Rue	s AG99-38	Basalt, Alkaline	-49.9	69.64	1	[74]	1.68	7.63	38.9	36.3	890	0.97	4.17	3	0.512581	0.705307	18.409	15.5363	38.9443	0.118579	0.51258	0.117978	0.705305	20.6453	0.149739	91.7184	18.4058	15.5362	38.9398	18.4058	15.5362	0.705305	0.51258
219	[42]	Kerguelen Archipelago	Mont Des Ruches	s BY96-25	Basalt	-48.87	68.96	28	[82]	2.73	3.94	17.49	17.2	357	0.24	1.36	1.1	0.512647	0.705031	18.284	15.535	38.81	0.13619	0.512622	0.139359	0.704976	13.8821	0.100686	81.2934	18.2236	15.5322	38.6973
220	[42]	Kerguelen Archipelago	Mont Des Ruches	s BY96-33	Basalt	-48.87	68.96	28	[82]	4.45	4.77	24.72	24	438	0.63	4.48	1.83	0.512485	0.705561	18.519	15.578	39.34	0.116652	0.512464	0.158501	0.705498	22.1447	0.160614	162.734	18.4226	15.5735	39.1144
221	[42]	Kerguelen Archipelago	Mont Des Ruches	s BY96-37	Basalt	-48.87	68.96	28	[82]	2.04	4.15	17.08	8.8	240	0.26	1.5	1.13	0.512664	0.705031	18.293	15.518	38.81	0.146893	0.512637	0.106058	0.704989	14.6381	0.10617	87.2719	18.2293	15.515	38.689
223	[42]	Kerguelen Archipelago	Mont Des Ruches	s BY96-39	Basalt	-48.87	68.96	28	[82]	4.22	2.43	8.87	1.5	170	0.1	0.58	0.41	0.51277	0.704414				0.165629	0.51274	0.0255205	0.704404
224	[42]	Kerguelen Archipelago	Mont Des Ruches	s BY96-41	Basalt	-48.87	68.96	28	[82]	3.05	7.18	30.26	29	428	0.69	3.01	2.59	0.512768	0.70467	18.208	15.501	38.52	0.143452	0.512742	0.19598	0.704592	16.8585	0.122274	75.9988	18.1346	15.4976	38.4146
225	[42]	Kerguelen Archipelago	Mont Des Ruches	s BY96-42	Basalt	-48.87	68.96	28	[82]	4.11	6.81	28.73	27.9	418	0.66	2.84	3.26	0.512767	0.704678	18.204	15.491	38.48	0.143306	0.512741	0.193057	0.704601	12.8019	0.0928514	56.9271	18.1483	15.4884	38.4011
226	[42]	Kerguelen Archipelago	Mont Des Ruches	s BY96-43	Basalt	-48.87	68.96	28	[82]	6.69	6.86	28.54	23.7	403	0.55	2.57	2.84	0.512733	0.704463				0.145318	0.512706	0.170095	0.704395
227	[42]	Kerguelen Archipelago	Mont Des Ruches	s BY96-43	Basalt	-48.87	68.96	28	[82]	6.69								0.512722	0.704467	18.346	15.523	38.71
229	[42][59]	Kerguelen Archipelago	Mont Des Ruches	s BY96-27	Basalt / Basalt, Transitional	-48.87	68.96	28	[82]	2.01	4.23	18.75	17.1	386	0.3	1.93	0.96	0.51263	0.705179	18.2539	15.5272	38.8273	0.136388	0.512605	0.128141	0.705128	19.8778	0.144172	132.152	18.1674	15.5232	38.6441
231	[42]	Kerguelen Archipelago	Mont Des Ruches	s BY96-34	Basalt	-48.87	68.96	28	[82]	2.26	5.02	25.49	24.6	482	0.69	4.11	3.22	0.512487	0.705679	18.345	15.566	39.11	0.119058	0.512465	0.147635	0.70562	13.707	0.0994159	84.3733	18.2853	15.5632	38.993
232	[42]	Kerguelen Archipelago	Mont Des Ruches	s BY96-45	Basalt	-48.87	68.96	28	[82]	2.22	6.45	27.07	14.2	418	0.51	2.46	1.7	0.512752	0.704431	18.471	15.546	38.94	0.144053	0.512726	0.0982562	0.704392	19.1728	0.139059	95.57	18.3875	15.5421	38.8075
233	[42]	Kerguelen Archipelago	Mont Des Ruches	s BY96-46	Basalt	-48.87	68.96	28	[82]	2.59	9.17	38.89	20.1	354	0.73	3.41	2.84	0.512675	0.704919	18.348	15.525	38.77	0.142552	0.512649	0.164233	0.704854	16.3577	0.118641	78.9632	18.2768	15.5217	38.6605
234	[42]	Kerguelen Archipelago	Mont Fontaine	s BY96-81	Basalt	-48.85	69.13	28	[82]	2.21	4.44	15.07	2.3	338	0.12	0.63	1.15	0.512735	0.704906	18.313	15.542	38.78	0.178122	0.512702	0.0196825	0.704898	6.6398	0.0481581	36.0234	18.2841	15.5407	38.7301
235	[42]	Kerguelen Archipelago	Mont Fontaine	s BY96-84	Basalt	-48.85	69.13	28	[82]	3.66	3.74	13.32	21.8	240	0.11	0.69	1.37	0.512754	0.704763				0.169753	0.512723	0.262729	0.704659
236	[42]	Kerguelen Archipelago	Mont Fontaine	s BY96-85	Basalt	-48.85	69.13	28	[82]	2.9	3.35	16.2	20.1	263	0.39	2.12	1.54	0.512649	0.705142	18.339	15.522	38.92	0.125017	0.512626	0.221064	0.705054	16.1465	0.11711	90.7027	18.2687	15.5187	38.7943
239	[42]	Kerguelen Archipelago	Mont Fontaine	s BY96-91	Basalt	-48.85	69.13	28	[82]	4.1	4.32	18.35	11.2	320	0.32	1.38	1.5	0.512747	0.704544	18.347	15.529	38.75	0.14233	0.512721	0.101233	0.704504	13.573	0.0984442	60.4889	18.2879	15.5262	38.6661
240	[42]	Kerguelen Archipelago	Mont Fontaine	s BY96-92	Basalt	-48.85	69.13	28	[82]	4.41	4.37	18.65	12.2	311	0.33	1.41	1.52	0.512774	0.704516	18.334	15.516	38.69	0.141663	0.512748	0.113462	0.704471	13.7968	0.100068	60.9193	18.2739	15.5132	38.6056
241	[42]	Kerguelen Archipelago	Mont Fontaine	s BY96-96	Basalt	-48.85	69.13	28	[82]	4.25	2.51	9.5	2.3	207	0.15	0.68	0.67	0.512712	0.704534	18.399	15.528	38.82	0.159734	0.512683	0.0321373	0.704521	14.2674	0.103481	66.8397	18.3369	15.5251	38.7273
242	[42]	Kerguelen Archipelago	Mont Fontaine	s BY96-100	Basalt	-48.85	69.13	28	[82]	3.23	4.28	18.01	14.3	352	0.29	1.32	2.01	0.512759	0.704591	18.302	15.523	38.73	0.143675	0.512733	0.117503	0.704544	9.17067	0.0665144	43.1368	18.2621	15.5211	38.6702
245	[42]	Kerguelen Archipelago	Mont Fontaine	s BY96-82	Basalt	-48.85	69.13	28	[82]	4.45	4.58	15.68	4	287	0.09	0.47	1.08	0.512738	0.704848				0.176591	0.512706	0.0403129	0.704832
246	[42][59]	Kerguelen Archipelago	Mont Fontaine	s BY96-86	Basalt / Basalt, Transitional	-48.85	69.13	28	[82]	2.8	3.57	17.45	20.3	414	0.43	2.28	1.71	0.512619	0.705147	18.3776	15.5436	39.0034	0.123683	0.512596	0.141832	0.705091	16.0639	0.116511	88.0215	18.3077	15.5403	38.8814
247	[42]	Kerguelen Archipelago	Mont Fontaine	s BY96-89	Basalt	-48.85	69.13	28	[82]	3.56	2	6.77	1.1	141	0.05	0.22	0.96	0.512803	0.704348	18.521	15.559	38.86	0.178606	0.51277	0.0225641	0.704339	3.32782	0.0241365	15.1316	18.5065	15.5583	38.839
248	[42]	Kerguelen Archipelago	Mont Fontaine	s BY96-98	Basalt	-48.85	69.13	28	[82]	4.41	4.34	17.76	9.6	433	0.3	1.37	1.66	0.512761	0.704602	18.309	15.523	38.71	0.14774	0.512734	0.0641266	0.704576	11.4851	0.0833008	54.2007	18.259	15.5207	38.6349
270	[78]	Kerguelen Archipelago	Mount Capitole	s 93-465	Basalt	-48.55	68.5	26	[70]	2.29	4.12	17.2	9.85	349	0.315	1.53	1.26	0.512693	0.704828	18.4193	15.5426	38.8937	0.144815	0.512668	0.0816348	0.704798	15.9555	0.115724	80.0869	18.3548	15.5396	38.7906
271	[78]	Kerguelen Archipelago	Mount Capitole	s 93-471	Basalt	-48.55	68.5	26	[70]	2.94	4.71	20.1	8.6	331	0.284	1.55	1.36	0.512705	0.704802	18.4037	15.5421	38.8658	0.141668	0.512681	0.0751509	0.704774	13.3196	0.0966061	75.1233	18.3499	15.5396	38.7691
272	[78]	Kerguelen Archipelago	Mount Capitole	s 93-472	Basalt	-48.55	68.5	26	[70]	4.39	4.23	17.6	6.17	389	0.171	1.34	1.11	0.512704	0.704772	18.4718	15.5536	38.9414	0.145303	0.512679	0.0458773	0.704755	9.8468	0.0714183	79.7397	18.432	15.5517	38.8388
281	[78]	Kerguelen Archipelago	Mount Capitole	s 93-465	Basalt	-48.55	68.5	26	[70]	2.29								0.512697	0.704808	18.4191	15.5424	38.8915
282	[78]	Kerguelen Archipelago	Mount Capitole	s 93-465	Basalt	-48.55	68.5	26	[70]	2.29								0.51268	0.704875	18.4236	15.5459	38.9124
287	[8]	Kerguelen Archipelago	Armor	s AG99-126	Picrite	-49.35	69.89	25	[70]	2.44	3.5	15.1	12.3	246	0.3	1.4	1	0.51263	0.705222	18.2893	15.5306	38.767	0.140129	0.512607	0.144628	0.705171	19.077	0.138364	91.9999	18.2152	15.5272	38.6531
301	[8]	Kerguelen Archipelago	Kerguelen Archipelago	s AG99-121	Basalt, Transitional	-49.35	69.89	25	[70]	4.31								0.512611		18.46	15.5454	39.0432
348	[75]	Kerguelen Archipelago	Val Gabbro Plutonic Suite	s K92	Gabbro, Clinopyroxene-Olivine	-48.55	68.5	24	[67]	2.62			9.8	546	0.26		1.08		0.70526	18.377	15.546	38.805			0.0519178	0.705242	15.338	0.111245	0	18.3198	15.5433	38.805
365	[73]	Kerguelen Archipelago	Mount Ross	s 145	Gabbro	-49.58	69.5	20	[83]	7.09	3.56	17.5			0.37	1.58	1.6	0.512673	0.704808	18.346	15.444	38.84	0.122986	0.512657			14.7138	0.106718	64.9308	18.3003	15.4419	38.7757
366	[50][64]	Kerguelen Archipelago	Ile de L'Ouest	s 80-135	Basalt, Alkaline / Basalt	-48.55	68.5	15	[75]	4.04	6.93	38.67	33	686	1	4.57	3.6	0.51254	0.70538	18.334	15.552	38.807	0.10834	0.512529	0.139148	0.70535	17.6893	0.1283	83.5407	18.2928	15.5501	38.745
367	[50][64]	Kerguelen Archipelago	Ile de L'Ouest	s 80-71	Basalt, Alkaline / Basalt	-48.55	68.5	15	[75]	3.63	10.09	58.03	74	696	1.92	8.82	8.1	0.5125	0.70564	18.234	15.545	38.978	0.105115	0.51249	0.307554	0.705574	15.1082	0.109579	71.722	18.1988	15.5434	38.9248
178	[76]	Kerguelen Archipelago	Foch	s KG2-1	Basalt	-48.55	68.5	29	[70]	N/A								0.512878	0.70388
179	[76]	Kerguelen Archipelago	Foch	s KG5-3	Basalt	-48.55	68.5	29	[70]	N/A								0.512631	0.70532
181	[76]	Kerguelen Archipelago	Foch Island	s KG5-3	Basalt	-48.55	68.5	29	[70]	N/A								0.512641	0.7053
199	[63]	Kerguelen Archipelago	Mount Bureau	s KG4-1	Basalt	-48.55	68.5	29	[70]	N/A								0.51287	0.70407	18.483	15.521	38.693
200	[79]	Kerguelen Archipelago	Mount Bureau	s GM92-59	Basalt, Transitional / Basalt	-48.55	68.5	29	[70]	N/A	5.03	20.1	3.8	339	0.12	1.7	0.7	0.512577	0.705511	18.226	15.536	38.94	0.151288	0.512548	0.0324248	0.705498	10.9183	0.0791901	159.844	18.1768	15.5337	38.7105
201	[79]	Kerguelen Archipelago	Mount Bureau	s GM92-52	Basalt, Transitional / Basalt	-48.55	68.5	29	[70]	N/A	5.3	23	11.2	374	0.34	1.39	1.13	0.512787	0.704094	18.482	15.556	38.83	0.139316	0.512761	0.0866124	0.704058	19.2061	0.139301	81.1421	18.3954	15.552	38.7135
202	[79][59]	Kerguelen Archipelago	Mount Bureau	s GM92-48	Basalt, Transitional / Basalt	-48.55	68.5	29	[70]	N/A	3.33	12.9	5.8	252	0.08	0.65	0.27	0.512879	0.703965	18.4748	15.5639	38.5495	0.15607	0.512849	0.0665665	0.703938	18.8413	0.136655	158.2	18.3898	15.5599	38.3224
203	[79]	Kerguelen Archipelago	Mount Bureau	s GM92-46	Basalt, Transitional / Basalt	-48.55	68.5	29	[70]	N/A	3.19	10.8	1.4	226	0.03	0.19	3.8	0.512775	0.704587	18.257	15.491	38.49	0.178575	0.512741	0.0179174	0.70458	0.49964	0.00362386	3.2701	18.2547	15.4909	38.4853
204	[79]	Kerguelen Archipelago	Mount Bureau	s GM92-31	Basalt, Transitional	-48.55	68.5	29	[70]	N/A	8.72	36.7	27.8	340	0.55	2.7	2.3	0.512627	0.705133	18.248	15.512	38.79	0.143644	0.5126	0.236507	0.705036	15.1987	0.110236	77.1045	18.1795	15.5088	38.6793
205	[79]	Kerguelen Archipelago	Mount Bureau	s GM92-30	Basalt, Transitional / Basalt	-48.55	68.5	29	[70]	N/A	7.89	36	23.5	373		2.67	2.2	0.512577	0.705288	18.127	15.521	38.77	0.132497	0.512552	0.18224	0.705213	0	0	79.5712	18.127	15.521	38.6558
206	[79]	Kerguelen Archipelago	Mount Bureau	s GM92-29	Basalt, Transitional / Basalt	-48.55	68.5	29	[70]	N/A	8.92	43.3	28.9	345	0.61	3.1	2.6	0.512618	0.705276	18.129	15.537	38.8	0.124541	0.512594	0.242305	0.705176	14.8949	0.108032	78.224	18.0618	15.5339	38.6877
207	[79]	Kerguelen Archipelago	Mount Rabouillere	s GM92-153	Basalt, Transitional / Basalt	-48.55	68.5	29	[70]	N/A	8.81	37.7	18.3	335	0.5	3.32	2.1	0.512603	0.705153	18.288	15.574	38.97	0.141276	0.512576	0.15801	0.705088	15.191	0.11018	104.238	18.2195	15.5708	38.8203
208	[79]	Kerguelen Archipelago	Mount Rabouillere	s GM92-145	Basalt, Transitional / Basalt	-48.55	68.5	29	[70]	N/A	3.6	13	12.5	275	0.18	0.84	0.67	0.512679	0.704296	18.398	15.558	38.83	0.167418	0.512647	0.131468	0.704242	17.13	0.124243	82.6104	18.3208	15.5544	38.7114
209	[79]	Kerguelen Archipelago	Mount Rabouillere	s GM92-144	Basalt, Transitional / Basalt	-48.55	68.5	29	[70]	N/A	7.14	30.9	10.2	334	0.4	2.82	1.8	0.512609	0.705104	18.438	15.581	39.12	0.139693	0.512583	0.0883345	0.705068	14.2372	0.103262	103.725	18.3738	15.578	38.9711
210	[79]	Kerguelen Archipelago	Mount Rabouillere	s GM92-129	Basalt, Transitional / Basalt	-48.55	68.5	29	[70]	N/A	2.97	11	2.9	214	0.05	0.46	0.19	0.512715	0.704516	18.202	15.547	38.65	0.163234	0.512684	0.0391955	0.7045	16.6915	0.121062	158.692	18.1267	15.5435	38.4221
211	[79]	Kerguelen Archipelago	Mount Rabouillere	s GM92-127	Basalt, Transitional / Basalt	-48.55	68.5	29	[70]	N/A	8.86	40.8	32.2	338	0.6	3.02	2.3	0.512573	0.705293	18.182	15.578	38.94	0.131282	0.512548	0.275565	0.705179	16.6145	0.120504	86.4197	18.1071	15.5745	38.8159
180	[65][76]	Kerguelen Archipelago	Foch	s KG6-2	Basalt	-48.55	68.5	29	[70]	N/A								0.512907	0.70398	18.399	15.524	38.473
212	[68]	Kerguelen Archipelago	Shield Stage	s BM64947	Tholeiite	-48.55	68.5	29	[70]	N/A	3	13.3	14	213	0.238	1.6		0.512672	0.70499				0.136368	0.512646	0.190117	0.704912
213	[68]	Kerguelen Archipelago	Shield Stage	s BM75061	Tholeiite	-48.55	68.5	29	[70]	N/A	3.4	15.3	4	271		1.7		0.512665	0.70492				0.134347	0.51264	0.0426933	0.704902
214	[68]	Kerguelen Archipelago	Shield Stage	s BM64881	Tholeiite	-48.55	68.5	29	[70]	N/A	3.3	12.6	3	385		0.5		0.512778	0.70475				0.158342	0.512748	0.0225383	0.704741
215	[68]	Kerguelen Archipelago	Shield Stage	s BM64878	Basalt, Alkaline	-48.55	68.5	29	[70]	N/A	7.9	34	14	513	0.283	1.1		0.51279	0.70459	18.112	15.481	38.29	0.140476	0.512763	0.0789342	0.704557
216	[68]	Kerguelen Archipelago	Shield Stage	s BM75059	Basalt, Alkaline	-48.55	68.5	29	[70]	N/A	6.7	31	15	768	0.316	1.4		0.512827	0.7044	18.313	15.592	38.477	0.130669	0.512802	0.0564907	0.704377
217	[68]	Kerguelen Archipelago	Shield Stage	s BM64886	Basalt, Alkaline	-48.55	68.5	29	[70]	N/A	8.7	51	15	975	1.103	2.2		0.512828		18.088	15.504	38.288	0.103135	0.512808
218	[68]	Kerguelen Archipelago	Shield Stage	s BM75179	Basalt, Alkaline	-48.55	68.5	29	[70]	N/A			19	1044				0.512824	0.70427						0.0526374	0.704248
249	[63]	Kerguelen Archipelago	Kerguelen Archipelago	s KG11-1	Basalt	-48.55	68.5	26	[70]	N/A								0.51267	0.70526	18.452	15.549	39.058
251	[46]	Kerguelen Archipelago	Mont De La Tourmente	s 93-358	Basalt, Alkaline	-49.5	70.5	26	[70]	N/A	7.84	31.7	3.4	335		2.16		0.512721	0.704755	18.384	15.52	38.775	0.149522	0.512696	0.0293559	0.704744
252	[46]	Kerguelen Archipelago	Mont De La Tourmente	s 93-360	Basalt, Transitional	-49.5	70.5	26	[70]	N/A	6.63	27.3	1.3	348		1.82		0.512732	0.704718	18.394	15.526	38.77	0.146825	0.512707	0.010805	0.704714
253	[46]	Kerguelen Archipelago	Mont De La Tourmente	s 93-365	Basalt, Transitional	-49.5	70.5	26	[70]	N/A	7.72	32.2	1.3	333		2.5		0.512727	0.704747	18.384	15.52	38.708	0.144947	0.512702	0.0112917	0.704743
254	[46]	Kerguelen Archipelago	Mont De La Tourmente	s 93-376	Basalt, Transitional	-49.5	70.5	26	[70]	N/A	7.33	31.2	14.3	342		2.24		0.5127	0.70481	18.445	15.56	38.889	0.142035	0.512676	0.120941	0.704765
255	[46]	Kerguelen Archipelago	Mont De La Tourmente	s 93-380	Basalt, Transitional	-49.5	70.5	26	[70]	N/A	7.96	34.7	0.6	358		2.4		0.512712	0.704799				0.138685	0.512688	0.00484766	0.704797
256	[46]	Kerguelen Archipelago	Mont De La Tourmente	s 93-381	Basalt, Transitional	-49.5	70.5	26	[70]	N/A	5.74	25.3	2.2	343		1.52		0.51272	0.704795	18.324	15.517	38.703	0.137164	0.512697	0.018552	0.704788
257	[46]	Kerguelen Archipelago	Mont De La Tourmente	s 93-394	Basalt, Alkaline	-49.5	70.5	26	[70]	N/A	8.41	33.9	31.5	320		2.45		0.512726	0.704813	18.419	15.516	38.824	0.149984	0.5127	0.284724	0.704708
258	[46]	Kerguelen Archipelago	Mont De La Tourmente	s 93-402	Basalt, Transitional	-49.5	70.5	26	[70]	N/A	6	23.7	3.2	350		1.59		0.512706	0.704789	18.406	15.563	38.885	0.153055	0.51268	0.0264451	0.704779
259	[46]	Kerguelen Archipelago	Mont De La Tourmente	s 93-403	Basalt, Transitional	-49.5	70.5	26	[70]	N/A	6.08	25	2.2	356		1.67		0.512696	0.704799				0.147031	0.512671	0.0178746	0.704792
260	[46]	Kerguelen Archipelago	Mont De La Tourmente	s 93-409	Basalt, Transitional	-49.5	70.5	26	[70]	N/A	6.44	27.7	7.4	337		2.19		0.512717	0.704693	18.436	15.523	38.825	0.140557	0.512693	0.0635127	0.70467
261	[46]	Kerguelen Archipelago	Mont De La Tourmente	s 93-381	Basalt, Transitional	-49.5	70.5	26	[70]	N/A								0.512716	0.704785
262	[46]	Kerguelen Archipelago	Mont De La Tourmente	s 93-351	Basalt, Alkaline / Basalt	-49.5	70.5	26	[70]	N/A	8.5	36.5	5.9	338		2.63		0.512715	0.704705				0.14079	0.512691	0.0504888	0.704686
263	[46]	Kerguelen Archipelago	Mont De La Tourmente	s 93-352	Basalt, Transitional / Basalt	-49.5	70.5	26	[70]	N/A	7.96	32.9	6.9	328		2.42		0.51273	0.704703	18.449	15.543	38.86	0.146273	0.512705	0.0608464	0.704681
264	[46]	Kerguelen Archipelago	Mont De La Tourmente	s 93-356	Basalt, Alkaline / Basalt	-49.5	70.5	26	[70]	N/A	8.37	34.3	25.8	323		2.51		0.512706	0.704753	18.434	15.576	38.92	0.147529	0.512681	0.231036	0.704668
265	[46]	Kerguelen Archipelago	Mont De La Tourmente	s 93-392	Basalt, Transitional / Basalt	-49.5	70.5	26	[70]	N/A	8.02	33.4	8.5	333		2.6		0.512704	0.704755	18.496	15.568	38.978	0.145169	0.512679	0.0738306	0.704728
266	[46]	Kerguelen Archipelago	Mont De La Tourmente	s 93-404	Basalt, Transitional / Basalt	-49.5	70.5	26	[70]	N/A	6.22	24.9	1.1	348		1.98		0.512741	0.704678	18.407	15.508	38.707	0.151022	0.512715	0.00914264	0.704675
267	[46]	Kerguelen Archipelago	Mont De La Tourmente	s 93-414	Basalt, Transitional / Basalt	-49.5	70.5	26	[70]	N/A	8.21	34.9	15.9	338		2.97		0.512712	0.70478	18.423	15.527	38.883	0.142221	0.512688	0.136064	0.70473
292	[50]	Kerguelen Archipelago	Jeanne D'Arc Peninsula	s K47	Basalt, Alkaline	-48.55	68.5	25	[70]	N/A	4.78	23.49	19	499		2.85		0.51259	0.70503				0.123021	0.51257	0.110135	0.704991
293	[76]	Kerguelen Archipelago	Kerguelen Archipelago	s KG8-4	Basalt	-48.55	68.5	25	[70]	N/A								0.512645	0.70531
294	[76]	Kerguelen Archipelago	Kerguelen Archipelago	s KG14-3	Basalt	-48.55	68.5	25	[70]	N/A								0.512631	0.70532
295	[76]	Kerguelen Archipelago	Kerguelen Archipelago	s I75	Basalt	-48.55	68.5	25	[70]	N/A								0.512685	0.70538
296	[76]	Kerguelen Archipelago	Kerguelen Archipelago	s I380	Basalt	-48.55	68.5	25	[70]	N/A								0.512657	0.70531
297	[76]	Kerguelen Archipelago	Kerguelen Archipelago	s I381	Basalt	-48.55	68.5	25	[70]	N/A								0.512671	0.70521
302	[40][39]	Kerguelen Archipelago	Kerguelen Archipelago	s 2621	Gabbro	-48.55	68.5	25	[70]	N/A	6.49	28.41	23	1187				0.512479	0.70577				0.138101	0.512456	0.0560508	0.70575
303	[40][39]	Kerguelen Archipelago	Kerguelen Archipelago	s 2625	Gabbro	-48.55	68.5	25	[70]	N/A			38	820				0.512461	0.70586						0.134054	0.705812
304	[40][39]	Kerguelen Archipelago	Kerguelen Archipelago	s 2608	Gabbro	-48.55	68.5	25	[70]	N/A			71	783				0.512549	0.70558	18.306	15.512	38.687			0.262297	0.705487
305	[40][39]	Kerguelen Archipelago	Kerguelen Archipelago	s 2618	Gabbro	-48.55	68.5	25	[70]	N/A			50	728				0.512499	0.70771						0.198713	0.707639
306	[40][39]	Kerguelen Archipelago	Kerguelen Archipelago	s 2623	Gabbro	-48.55	68.5	25	[70]	N/A			28	1090				0.512448	0.70563	18.117	15.506	38.722			0.0743071	0.705604
307	[40][39]	Kerguelen Archipelago	Kerguelen Archipelago	s 3308	Basalt / Basalt, Nepheline	-48.55	68.5	25	[70]	N/A	8.17	43.34	61	824				0.512543	0.70528	17.991	15.545	38.247	0.113963	0.512524	0.214134	0.705204
308	[40][39]	Kerguelen Archipelago	Kerguelen Archipelago	s 3310	Gabbro / Gabbro, Nepheline	-48.55	68.5	25	[70]	N/A			25	666				0.512562	0.70553	18.433	15.514	38.918			0.108583	0.705491
309	[40][39]	Kerguelen Archipelago	Kerguelen Archipelago	s 3317	Basalt	-48.55	68.5	25	[70]	N/A			21	540				0.512551	0.70515	18.158	15.468	38.52			0.112487	0.70511
310	[40][39]	Kerguelen Archipelago	Kerguelen Archipelago	s 3319	Basalt, Alkaline	-48.55	68.5	25	[70]	N/A	9.69	42.81	17	369				0.512447	0.70551	18.155	15.488	38.647	0.136835	0.512425	0.133265	0.705463
289	[74]	Kerguelen Archipelago	Gaby Island	s LVLK130	Basalt, Alkaline	-48.55	68.5	25	[70]	N/A	6.65	30.5	26	504	0.9	3.62	2.3	0.51275	0.70497	18.607	15.579	39.212	0.131817	0.512728	0.149215	0.704917	25.1572	0.182464	104.568	18.5092	15.5745	39.0826
290	[74]	Kerguelen Archipelago	Jeanne D'Arc Peninsula	s LVLK108	Basalt, Alkaline	-48.55	68.5	25	[70]	N/A	7.03	31.5	32	419	0.9	4.15	2.7	0.5127	0.70518	18.543	15.566	39.116	0.134924	0.512678	0.22091	0.705102	21.3804	0.155071	101.881	18.4599	15.5621	38.9899
291	[74]	Kerguelen Archipelago	Jeanne D'Arc Peninsula	s LVLK123	Basalt, Alkaline / Basalt	-48.55	68.5	25	[70]	N/A	6.61	29.2	21	407	0.8	3.67	2.4	0.51262	0.70526	18.379	15.559	39.03	0.136853	0.512598	0.149248	0.705207	21.3065	0.154535	101.009	18.2962	15.5551	38.905
311	[40][39]	Kerguelen Archipelago	Kerguelen Island	s 2682	Gabbro / Syenite	-48.55	68.5	25	[70]	N/A			135.6	1.92	2.15		9.77	0.512546	0.7307	18.692	15.579	39.522			204.796	0.657985	14.2231	0.103159		18.6367	15.5764
312	[74]	Kerguelen Archipelago	Mont Rouge	s LVLK87	Basalt, Alkaline	-48.55	68.5	25	[70]	N/A	6.34	28.5	30	471	0.7	3.55	2.5	0.51265	0.70519	18.44	15.553	39.012	0.134488	0.512628	0.184239	0.705125	17.9063	0.129874	93.8444	18.3704	15.5498	38.8959
313	[74]	Kerguelen Archipelago	Mont Rouge	s LVLK88	Basalt, Alkaline / Basalt	-48.55	68.5	25	[70]	N/A	5.04	23.2	24	406	0.6	2.42	2.3	0.51272	0.70527	18.539	15.591	39.193	0.131338	0.512699	0.170989	0.705209	16.7546	0.12152	69.8345	18.4739	15.588	39.1066
314	[74]	Kerguelen Archipelago	Mount Berlioz	s ARC195	Basanitoid	-48.55	68.5	25	[70]	N/A	15.1	85.4	63.3	1097	2.3	10.7	8.5	0.51254	0.70562	18.263	15.569	38.923	0.106893	0.512523	0.166915	0.705561	17.2462	0.125085	82.9124	18.196	15.5659	38.8204
315	[59]	Kerguelen Archipelago	Mount Crozier	s OB93-177	Basalt, Alkaline	-48.55	68.5	25	[70]	N/A										18.4802	15.5682	39.1292
316	[59]	Kerguelen Archipelago	Mount Crozier	s OB93-177	Basalt, Alkaline	-48.55	68.5	25	[70]	N/A										18.4459	15.5606	39.0594
317	[59]	Kerguelen Archipelago	Mount Crozier	s OB93-177	Basalt, Alkaline	-48.55	68.5	25	[70]	N/A										18.4493	15.5609	39.0603
318	[59]	Kerguelen Archipelago	Mount Crozier	s OB93-177	Basalt, Alkaline	-48.55	68.5	25	[70]	N/A										18.4534	15.5615	39.061
319	[59]	Kerguelen Archipelago	Mount Crozier	s OB93-177	Basalt, Alkaline	-48.55	68.5	25	[70]	N/A										18.4528	15.5624	39.0639
320	[59]	Kerguelen Archipelago	Mount Crozier	s OB93-177	Basalt, Alkaline	-48.55	68.5	25	[70]	N/A										18.4534	15.563	39.0654
321	[59]	Kerguelen Archipelago	Mount Crozier	s OB93-177	Basalt, Alkaline	-48.55	68.5	25	[70]	N/A										18.448	15.5598	39.0583
322	[59]	Kerguelen Archipelago	Mount Crozier	s OB93-202	Basalt, Alkaline	-48.55	68.5	25	[70]	N/A										18.4917	15.5734	39.1247
323	[59]	Kerguelen Archipelago	Mount Crozier	s OB93-202	Basalt, Alkaline	-48.55	68.5	25	[70]	N/A										18.4957	15.5724	39.1123
324	[59]	Kerguelen Archipelago	Mount Crozier	s OB93-202	Basalt, Alkaline	-48.55	68.5	25	[70]	N/A										18.4934	15.5728	39.109
325	[59]	Kerguelen Archipelago	Mount Crozier	s OB93-202	Basalt, Alkaline	-48.55	68.5	25	[70]	N/A										18.4976	15.574	39.1166
326	[60][59]	Kerguelen Archipelago	Mount Crozier	s OB93-165	Basalt / Basalt, Alkaline	-48.55	68.5	25	[70]	N/A								0.512621	0.705298	18.5868	15.5744	39.2878
328	[58]	Kerguelen Archipelago	Mount Tizzard	s MG-91-106	Gabbro, Ilmenite	-48.55	68.5	25	[70]	N/A	2.45	6.7		209			0.15	0.51278	0.70467	18.125	15.528	38.626	0.221078	0.512744	0	0.70467
333	[48]	Kerguelen Archipelago	Ravin Du Charbon	s 273	Trachybasalt	-48.55	68.5	25	[48]	N/A	9.04	42.6	35	872		4.44		0.512651	0.705163	18.518	15.578	39.137	0.128292	0.51263	0.1161	0.705122
334	[48]	Kerguelen Archipelago	Ravin Du Charbon	s 271	Trachybasalt	-48.55	68.5	25	[48]	N/A	9.97	48.2	37.3	873		5.11		0.512647	0.705169	18.534	15.57	39.128	0.125051	0.512627	0.123587	0.705125
335	[48]	Kerguelen Archipelago	Ravin Du Charbon	s 717	Trachybasalt	-48.55	68.5	25	[48]	N/A	9.48	45.5	41.8	494		5.46		0.512646	0.705188	18.558	15.561	39.059	0.125961	0.512625	0.244754	0.705101
336	[48]	Kerguelen Archipelago	Ravin Du Charbon	s 720	Trachybasalt	-48.55	68.5	25	[48]	N/A	8.04	39.3	42.3	536		6.39		0.512613	0.705297	18.538	15.54	39.098	0.12368	0.512593	0.228276	0.705216
337	[48]	Kerguelen Archipelago	Ravin Du Charbon	s 729	Basalt, Alkaline	-48.55	68.5	25	[48]	N/A	8.52	42.3	37	625		5.31		0.512637	0.7052	18.466	15.535	39.004	0.121769	0.512617	0.171239	0.705139
338	[48]	Kerguelen Archipelago	Ravin Du Charbon	s 731	Trachybasalt	-48.55	68.5	25	[48]	N/A	8.07	38.7	47.9	844		6.51		0.512639	0.705231	18.5	15.554	39.088	0.126067	0.512618	0.164163	0.705173
339	[48]	Kerguelen Archipelago	Ravin Du Charbon	s 734	Basalt, Alkaline	-48.55	68.5	25	[48]	N/A	9.31	48.7	53.6	744		6.43		0.512602	0.705299	18.412	15.553	39.048	0.115573	0.512583	0.20839	0.705225
340	[48]	Kerguelen Archipelago	Ravin Du Charbon	s 714	Basalt, Alkaline	-48.55	68.5	25	[48]	N/A	7.05	31.8	34.4	558		4.26		0.512644	0.704892	18.237	15.523	38.616	0.13403	0.512622	0.178317	0.704829
341	[48]	Kerguelen Archipelago	Ravin Jaune	s 678	Basalt, Alkaline	-48.55	68.5	25	[48]	N/A	6.89	29.5	25.2	421		3.17		0.512635	0.705223	18.45	15.531	38.974	0.1412	0.512612	0.173141	0.705162
342	[48]	Kerguelen Archipelago	Ravin Jaune	s 685	Basalt, Alkaline	-48.55	68.5	25	[48]	N/A	7.68	35.8	40.4	411		4.19		0.512603	0.705249	18.441	15.561	39.059	0.129692	0.512582	0.28433	0.705148
343	[48]	Kerguelen Archipelago	Ravin Jaune	s 682	Basanite	-48.55	68.5	25	[48]	N/A	9.61	47.1	55.1	818		6.8		0.51263	0.704978	18.258	15.517	38.645	0.12335	0.51261	0.194836	0.704909
344	[48]	Kerguelen Archipelago	Ravin Jaune	s 685	Basalt, Alkaline	-48.55	68.5	25	[70]	N/A									0.70526	18.418	15.531	38.978
327	[58]	Kerguelen Archipelago	Mount Tizzard	s MG-91-116	Gabbro	-48.55	68.5	25	[70]	N/A	0.05	0.16	0.09	112	0.006		0.03		0.70422	18.174	15.57	38.181	0.166093		0.00232415	0.704219
329	[58]	Kerguelen Archipelago	Mount Tizzard	s GM-92-419	Gabbro, Ilmenite	-48.55	68.5	25	[70]	N/A	2.43	6.42	0.38	89.8	0.006		0.2	0.51288	0.70425	18.184	15.532	38.464	0.228842	0.512843	0.012239	0.704246
330	[58]	Kerguelen Archipelago	Mount Tizzard	s MG-91-116	Gabbro	-48.55	68.5	25	[70]	N/A		0.12						0.51284	0.70432				0	0.51284
347	[73]	Kerguelen Archipelago	Mount Ross	s 91	Gabbro	-49.58	69.5	24	[83]	N/A	7.76	40			1.2	5.36	5.4	0.512622	0.70512	18.327	15.546	38.9	0.117284	0.512604			14.1669	0.102752	65.3926	18.2742	15.5435	38.8223
349	[67]	Kerguelen Archipelago	Val Gabbro Plutonic Suite	s MPC99-36	Clinopyroxenite, Olivine	-49.7114	70.0801	24	[67]	N/A	3.2	13.2	13.1	226	0.29	1.36	0.95	0.512635	0.70506	18.464	15.541	39.01	0.14656	0.512612	0.167663	0.705003	19.5246	0.141611	94.6222	18.3912	15.5376	38.8976
350	[67]	Kerguelen Archipelago	Val Gabbro Plutonic Suite	s MPC99-40	Clinopyroxenite, Olivine	-49.7248	70.0807	24	[67]	N/A	1.5	5.8	2.1	235	0.04	0.21	0.57	0.512616	0.705217	18.435	15.531	38.98	0.156351	0.512591	0.0258483	0.705208	4.48422	0.0325238	24.3286	18.4183	15.5302	38.9511
351	[67]	Kerguelen Archipelago	Val Gabbro Plutonic Suite	s MPC99-46	Gabbro	-49.7291	70.0752	24	[67]	N/A	3.27	14	12.7	510	0.33	1.79	1.33	0.51258	0.705362	18.348	15.537	38.93	0.141206	0.512558	0.0720313	0.705337	15.8269	0.114792	88.7169	18.289	15.5343	38.8246
352	[67]	Kerguelen Archipelago	Val Gabbro Plutonic Suite	s MPC99-60	Gabbro	-49.7164	70.0777	24	[67]	N/A	5.23	23.7	23	586	0.37	2.55	2.65	0.512567	0.705284	18.412	15.543	38.97	0.133409	0.512546	0.113531	0.705245	8.91939	0.0646919	63.525	18.3787	15.5415	38.8945
353	[67]	Kerguelen Archipelago	Val Gabbro Plutonic Suite	s MPC99-51	Gabbro	-49.7207	70.0752	24	[67]	N/A	7.51	33.7	35.8	466	0.61	3.55	2.78	0.512581	0.705269	18.449	15.531	38.99	0.134723	0.51256	0.222219	0.705193	14.0258	0.101728	84.3524	18.3967	15.5286	38.8898
354	[67]	Kerguelen Archipelago	Val Gabbro Plutonic Suite	s MPC99-24	Gabbro	-49.7102	70.0792	24	[67]	N/A	8.8	39.9	40.7	531	0.86	4.34	3.41	0.512588	0.705232	18.331	15.504	38.83	0.133335	0.512567	0.221708	0.705156	16.0544	0.116441	83.7251	18.2711	15.5012	38.7305
355	[67]	Kerguelen Archipelago	Val Gabbro Plutonic Suite	s MPC99-25	Gabbro	-49.7102	70.0792	24	[67]	N/A	8.39	38.3	39.2	527	0.75	4.23	2.56	0.512586	0.705248	18.367	15.539	38.91	0.132433	0.512565	0.215158	0.705175	18.6879	0.135542	108.921	18.2973	15.5358	38.7806
356	[67]	Kerguelen Archipelago	Val Gabbro Plutonic Suite	s MPC99-51	Gabbro	-49.7207	70.0752	24	[67]	N/A										18.475	15.551	39.04
357	[67]	Kerguelen Archipelago	Val Gabbro Plutonic Suite	s MPC99-24	Gabbro	-49.7102	70.0792	24	[67]	N/A										18.368	15.537	38.93
358	[67]	Kerguelen Archipelago	Val Gabbro Plutonic Suite	s MPC99-24	Gabbro	-49.7102	70.0792	24	[67]	N/A										18.389	15.563	39
359	[67]	Kerguelen Archipelago	Val Gabbro Plutonic Suite	s MPC99-25	Gabbro	-49.7102	70.0792	24	[67]	N/A										18.378	15.545	38.94
360	[67]	Kerguelen Archipelago	Val Gabbro Plutonic Suite	s MPC99-25	Gabbro	-49.7102	70.0792	24	[67]	N/A										18.385	15.555	38.97
362	[73]	Kerguelen Archipelago	Mount Ross	s 83	Gabbro	-49.58	69.5	22	[83]	N/A	4.57	18.9			0.48	1.75	1.4	0.512658	0.705023	18.017	15.488	38.39	0.146182	0.512637			21.5974	0.156644	81.3708	17.9432	15.4846	38.3014
363	[73]	Kerguelen Archipelago	Mount Ross	s 128	Trachybasalt	-49.58	69.5	22	[83]	N/A	8.1	40.1	36.9	756	0.84	3.9	2.8	0.512614	0.704999	18.38	15.547	38.96	0.122117	0.512596	0.141181	0.704955	19.1548	0.138929	91.904	18.3145	15.544	38.8599
364	[73]	Kerguelen Archipelago	Mount Ross	s 78	Gabbro	-49.58	69.5	21	[83]	N/A	5.01	22.1			0.46	2.01	1.9	0.51259	0.705486	18.397	15.557	39.01	0.13705	0.512571			15.4744	0.112235	69.8752	18.3465	15.5547	38.9374
368	[40][39]	Kerguelen Archipelago	Rallier du Baty	s 3315	Basanite	-48.55	68.5	15	[40]	N/A	6.49	28.44	19	646				0.512711	0.70465	18.065	15.463	38.173	0.137963	0.512697	0.0850704	0.704632
369	[40]	Kerguelen Archipelago	Rallier du Baty	s 2599	Gabbro	-48.55	68.5	14	[40]	N/A										18.679	15.609	39.379
370	[40]	Kerguelen Archipelago	Rallier du Baty	s 2603	Gabbro	-48.55	68.5	14	[40]	N/A										18.574	15.627	39.23
371	[40]	Kerguelen Archipelago	Rallier du Baty	s 2678	Gabbro	-48.55	68.5	14	[40]	N/A										18.58	15.583	39.282
372	[40]	Kerguelen Archipelago	Rallier du Baty	s 2679	Gabbro	-48.55	68.5	14	[40]	N/A										18.481	15.526	39.029
373	[40]	Kerguelen Archipelago	Rallier du Baty	s 2680	Gabbro	-48.55	68.5	14	[40]	N/A										18.531	15.565	39.126
374	[40]	Kerguelen Archipelago	Rallier du Baty	s 2683	Gabbro	-48.55	68.5	14	[40]	N/A										18.509	15.554	39.118
375	[68]	Kerguelen Archipelago	Kerguelen Archipelago	s BM1967,P8(5)	Basalt, Alkaline	-48.55	68.5	10	[74]	N/A	9.1	54	62	706		6.1		0.512541	0.70541	18.086	15.532	38.71	0.101877	0.512534	0.254025	0.705374
376	[68]	Kerguelen Archipelago	Kerguelen Archipelago	s BM75190	Basalt, Alkaline	-48.55	68.5	10	[74]	N/A	5.5	32	48	501	0.693	4.2		0.512498	0.70568	18.06	15.537	38.884	0.103905	0.512491	0.277143	0.705641
377	[68]	Kerguelen Archipelago	Kerguelen Archipelago	s BM64852	Basalt, Alkaline	-48.55	68.5	10	[74]	N/A	6.1	34	38	449		4.3		0.512507	0.70598				0.108462	0.5125	0.244822	0.705945
378	[74]	Kerguelen Archipelago	Ronarch Peninsula	s LVLK70	Basalt, Alkaline / Basalt	-48.55	68.5	10	[74]	N/A	5.4	25.5	26	380	0.7	2.86	2.2	0.51266	0.7052	18.526	15.591	39.165	0.128025	0.512652	0.197911	0.705172	20.4243	0.148136	86.2354	18.4943	15.5895	39.1223
380	[74]	Kerguelen Archipelago	Ronarch Peninsula	s ARC321	Basanite	-48.55	68.5	10	[74]	N/A	16.9	97.7	86.4	1274	2.2	9.9	8.1	0.51249	0.70576	18.071	15.56	38.879	0.104572	0.512483	0.196177	0.705732	17.2537	0.12514	80.2353	18.0442	15.5588	38.8393
386	[73]	Kerguelen Archipelago	Mount Ross	s 121	Gabbro	-49.58	69.5	1	[83]	N/A	7.98	40.4	43	945	1.2	5.36	4.1	0.512601	0.705167	18.08	15.53	38.51	0.119414	0.5126	0.131618	0.705165	18.4937	0.134134	85.3646	18.0771	15.5299	38.5058
387	[40][39]	Kerguelen Archipelago	Kerguelen Archipelago	s 3312	Basalt, Alkaline	-48.55	68.5	0.8	[40]	N/A	7.91	38.62	31	474				0.512346	0.70574	18.276	15.489	38.681	0.123815	0.512345	0.189185	0.705738
388	[75]	Kerguelen Archipelago	Kerguelen Archipelago	s 80.25	Gabbro, Biotite	-48.55	68.5	0	-	N/A			37.7	1066	1		3.2	0.51252	0.70544	18.373	15.564	38.91			0.1023	0.70544	19.9421	0.144639	0	18.373	15.564	38.91
389	[75]	Kerguelen Archipelago	Kerguelen Archipelago	s 77.25	Gabbro	-48.55	68.5	0	-	N/A			33.9	755	0.99		3.53	0.51263	0.70514	18.496	15.546	39.042			0.129877	0.70514	17.9544	0.130222	0	18.496	15.546	39.042
390	[75]	Kerguelen Archipelago	Kerguelen Archipelago	s 77.103C	Gabbro, Clinopyroxene-Olivine	-48.55	68.5	0	-	N/A			7.3	522	0.19		1.8	0.51261	0.70538	18.354	15.58	38.912			0.0404521	0.70538	6.73591	0.0488552	0	18.354	15.58	38.912
391	[75]	Kerguelen Archipelago	Kerguelen Archipelago	s 81.85	Gabbro, Biotite	-48.55	68.5	0	-	N/A			68	821	1.5		4.5	0.51257	0.70512	18.317	15.53	38.806			0.239576	0.70512	21.2157	0.153876	0	18.317	15.53	38.806
452	[29]	Kerguelen Plateau (Miocene Seamounts)	MD109, Dredge 4 (Unnamed Seamount)	s D4-37	Basalt	-51.52	71.15	21	[29]	N/A			45.7	660				0.512525	0.705942	18.451	15.551	39.009			0.200302	0.705882
453	[29]	Kerguelen Plateau (Miocene Seamounts)	MD109, Dredge 6 (Unnamed Seamount)	s D6-88	Picrite	-51.02	71.07	19	[29]	N/A	5.18	24.9	26.7	415		2.41		0.512547	0.705681	17.872	15.538	38.265	0.125765	0.512531	0.186108	0.705631
454	[29]	Kerguelen Plateau (Miocene Seamounts)	MD109, Dredge 6 (Unnamed Seamount)	s D6-88	Picrite	-51.02	71.07	19	[29]	N/A									0.705703	17.869	15.531	38.266
455	[29]	Kerguelen Plateau (Miocene Seamounts)	MD109, Dredge 5 (Unnamed Seamount)	s D5-44A	Basalt, Olivine	-51.52	71.13	18	[29]	N/A	11.6	59.6	33.8	842		6		0.512606	0.705625	18.214	15.517	38.634	0.117665	0.512592	0.116119	0.705595
456	[29]	Kerguelen Plateau (Miocene Seamounts)	MD109, Dredge 5 (Unnamed Seamount)	s D5-44B	Basalt, Olivine	-51.52	71.13	17	[29]	N/A	13.4	69.4	34.6	907		6.7		0.512576	0.705658	18.208	15.527	38.658	0.116729	0.512563	0.110349	0.705631
457	[29]	Kerguelen Plateau (Miocene Seamounts)	MD109, Dredge 5 (Unnamed Seamount)	s D5-42	Basalt, Olivine	-51.52	71.13	17	[29]	N/A	12.4	62	46.2	882		6.76		0.512582	0.705654	18.179	15.511	38.576	0.12091	0.512569	0.151521	0.705617
458	[29]	Kerguelen Plateau (Miocene Seamounts)	MD109, Dredge 5 (Unnamed Seamount)	s D5-44B	Basalt, Olivine	-51.52	71.13	16.9	[29]	N/A									0.705676	18.197	15.524	38.662
459	[29]	Kerguelen Plateau (Miocene Seamounts)	MD109, Dredge 6 (Unnamed Seamount)	s D6-87	Picrite	-51.02	71.07	15	[29]	N/A	5.2	26.2	25.4	409		2.28		0.512533	0.705683	17.874	15.54	38.274	0.119986	0.512521	0.179643	0.705645
460	[29]	Kerguelen Plateau (Miocene Seamounts)	MD109, Dredge 6 (Unnamed Seamount)	s D6-89	Picrite	-51.02	71.07	14	[29]	N/A	5.13	24.8	25.6	406		2.36		0.512526	0.705699	17.876	15.541	38.278	0.125053	0.512515	0.182396	0.705663
461	[29]	Kerguelen Plateau (Miocene Seamounts)	MD109, Dredge 6 (Unnamed Seamount)	s D6-85	Picrite	-51.02	71.07	14	[29]	N/A	5.25	27	25.3	422		2.4		0.512543	0.705694	17.875	15.536	38.266	0.117551	0.512532	0.173424	0.70566
462	[29]	Kerguelen Plateau (Miocene Seamounts)	MD109, Dredge 4 (Unnamed Seamount)	s D4-33	Basalt	-51.52	71.15	0.7	[29]	N/A								0.512942	0.7031	19.677	15.686	39.347
463	[29]	Kerguelen Plateau (Miocene Seamounts)	MD109, Dredge 4 (Unnamed Seamount)	s D4-33	Basalt	-51.52	71.15	0.7	[29]	N/A	8.88	38.3	17.8	577		3.17		0.512946	0.703126	19.669	15.678	39.315	0.14018	0.512945	0.0892147	0.703125
481	[84]	Northern Kerguelen Plateau	ODP Leg 183, Site 1140	s 183-1140A-36R-3-97–118	Tholeiite / Basalt, Tholeiitic	-46.26	68.4917	34	[9]	1.47	3.07	8.8	0.68	124	0.1	0.44	0.57	0.512958	0.703697	18.386	15.527	38.58	0.210925	0.512911	0.01586	0.703689	11.1417	0.0808102	50.6612	18.3271	15.5242	38.4947	18.3271	15.5242	0.703689	0.512911
464	[84]	Northern Kerguelen Plateau	ODP Leg 183, Site 1140	s 183-1140A-25R-6-51–58	Tholeiite / Basalt, Tholeiitic	-46.26	68.4917	34	[9]	1.48	3.38	9.49	1.3	130	0.1	0.47	0.6	0.513025	0.703429	18.231	15.502	38.4	0.215342	0.512977	0.0289205	0.703415	10.5328	0.0763939	51.158	18.1753	15.4994	38.3139	18.1753	15.4994	0.703415	0.512977
468	[84]	Northern Kerguelen Plateau	ODP Leg 183, Site 1140	s 183-1140A-31R-1-57–61	Tholeiite / Basalt, Tholeiitic	-46.26	68.4917	34	[9]	1.65	5.51	20.4	6.23	262	0.37	1.64	1.52	0.512829	0.704281	18.544	15.575	38.91	0.163298	0.512793	0.0687746	0.704248	15.5719	0.112942	71.3272	18.4617	15.5712	38.7899	18.4617	15.5712	0.704248	0.512793
465	[84]	Northern Kerguelen Plateau	ODP Leg 183, Site 1140	s 183-1140A-26R-1-7–10	Tholeiite / Basalt, Tholeiitic	-46.26	68.4917	34	[9]	1.84			9.5	142				0.513001	0.703434	18.172	15.531	38.28			0.193482	0.703341							18.172	15.531	0.703434	0.513001
466	[84]	Northern Kerguelen Plateau	ODP Leg 183, Site 1140	s 183-1140A-27R-2-0–5	Tholeiite / Basalt, Tholeiitic	-46.26	68.4917	34	[9]	1.62			0.8	129				0.513013	0.703401	18.219	15.532	38.38			0.0179351	0.703392							18.219	15.532	0.703401	0.513013
467	[84]	Northern Kerguelen Plateau	ODP Leg 183, Site 1140	s 183-1140A-28R-3-29–32	Tholeiite / Basalt, Tholeiitic	-46.26	68.4917	34	[9]	1.01			1	132				0.513008	0.703388	18.237	15.54	38.45			0.0219094	0.703377							18.237	15.54	0.703388	0.513008
469	[84]	Northern Kerguelen Plateau	ODP Leg 183, Site 1140	s 183-1140A-31R-1-53–57	Tholeiite / Basalt, Tholeiitic	-46.26	68.4917	34	[9]	1.12			10.8	259				0.512812	0.704257	18.524	15.564	38.87			0.120605	0.704199							18.524	15.564	0.704257	0.512812
472	[84]	Northern Kerguelen Plateau	ODP Leg 183, Site 1140	s 183-1140A-32R-1-55–57	Tholeiite / Basalt, Tholeiitic	-46.26	68.4917	34	[9]	0.72			3.9	262				0.512767	0.704411	18.605	15.577	39.01			0.0430537	0.70439							18.605	15.577	0.704411	0.512767
477	[84]	Northern Kerguelen Plateau	ODP Leg 183, Site 1140	s 183-1140A-33R-2-78–81	Tholeiite / Basalt, Tholeiitic	-46.26	68.4917	34	[9]	1.46			0.3	126				0.512924	0.703729	18.386	15.539	38.6			0.00688603	0.703726							18.386	15.539	0.703729	0.512924
480	[84]	Northern Kerguelen Plateau	ODP Leg 183, Site 1140	s 183-1140A-35R-4-50–52	Tholeiite / Basalt, Tholeiitic	-46.26	68.4917	34	[9]	0.97			1.5	138				0.512942	0.703705	18.421	15.543	38.61			0.0314361	0.70369							18.421	15.543	0.703705	0.512942
482	[84]	Northern Kerguelen Plateau	ODP Leg 183, Site 1140	s 183-1140A-37R-3-104–108	Tholeiite / Basalt, Tholeiitic	-46.26	68.4917	34	[9]	0.92			11.5	137				0.512937	0.703766	18.477	15.561	38.7			0.242771	0.703649							18.477	15.561	0.703766	0.512937
470	[84]	Northern Kerguelen Plateau	ODP Leg 183, Site 1140	s 183-1140A-31R-1-95–105	Tholeiite / Basalt, Tholeiitic	-46.26	68.4917	34	[9]	2.35	5.16	20.3	2.65	252	0.36	1.59	1.4	0.512815	0.704233	18.512	15.555	38.83	0.153678	0.512781	0.0304148	0.704218	16.4204	0.119096	74.946	18.4252	15.5509	38.7038
471	[84]	Northern Kerguelen Plateau	ODP Leg 183, Site 1140	s 183-1140A-31R-2-20–24	Tholeiite / Basalt, Tholeiitic	-46.26	68.4917	34	[9]	3.59	7.37	29	6.65	258	0.58	2.44	1.94	0.512783	0.704466	18.59	15.576	38.97	0.153647	0.512749	0.0745506	0.70443	19.153	0.138916	83.2664	18.4887	15.5713	38.8298
473	[84]	Northern Kerguelen Plateau	ODP Leg 183, Site 1140	s 183-1140A-32R-1-126–131	Tholeiite / Basalt, Tholeiitic	-46.26	68.4917	34	[9]	3.31	7.31	28.4	7.62	254	0.58	2.52	2.39	0.512791	0.704469	18.608	15.567	39	0.155616	0.512756	0.0867702	0.704427	15.555	0.112819	69.8414	18.5257	15.5632	38.8824
474	[84]	Northern Kerguelen Plateau	ODP Leg 183, Site 1140	s 183-1140A-32R-2-45–50	Tholeiite / Basalt, Tholeiitic	-46.26	68.4917	34	[9]	4.43	7.4	28.1	4.53	260	0.57	2.32	1.9	0.512785	0.704426	18.61	15.589	39.02	0.159213	0.51275	0.0503933	0.704402	19.2406	0.139551	80.9286	18.5083	15.5842	38.8838
475	[84]	Northern Kerguelen Plateau	ODP Leg 183, Site 1140	s 183-1140A-32R-4-0–6	Tholeiite / Basalt, Tholeiitic	-46.26	68.4917	34	[9]	3	3.05	8.67	7.03	131	0.56	0.53	0.59	0.512945	0.703775	18.59	15.584	38.71	0.212692	0.512898	0.155204	0.7037	60.5985	0.439518	59.2681	18.2695	15.569	38.6102
476	[84]	Northern Kerguelen Plateau	ODP Leg 183, Site 1140	s 183-1140A-33R-1-122–126	Tholeiite / Basalt, Tholeiitic	-46.26	68.4917	34	[9]	3.41	3.09	9.08	14.5	127	0.22	0.53	0.52	0.51295	0.703851	18.416	15.535	38.6	0.205752	0.512904	0.330208	0.703692	26.8898	0.19503	66.944	18.2738	15.5284	38.4873
478	[84]	Northern Kerguelen Plateau	ODP Leg 183, Site 1140	s 183-1140A-33R-3-19–24	Tholeiite / Basalt, Tholeiitic	-46.26	68.4917	34	[9]	5.28	3.1	8.91	0.75	116	0.13	0.51	0.54	0.512952	0.70376	18.413	15.553	38.67	0.210356	0.512905	0.0186992	0.703751	15.3187	0.111106	62.1039	18.332	15.5492	38.5654
479	[84]	Northern Kerguelen Plateau	ODP Leg 183, Site 1140	s 183-1140A-34R-6-33–39	Tholeiite / Basalt, Tholeiitic	-46.26	68.4917	34	[9]	2.06	3.13	9.44	0.56	128	0.11	0.45	0.56	0.512949	0.703697	18.383	15.533	38.55	0.200467	0.512904	0.012653	0.703691	12.4701	0.0904452	52.7183	18.3171	15.5299	38.4612
484	[19]	Kerguelen Plateau (Skiff Bank)	ODP Leg 183, Site 1139	s 183-1139A-62R2,74-79	Trachyandesite, Basaltic	-50.185	63.94	68.3	[9]	6.98	12.7	59.8	60.2	136	0.75	4.16	6.9	0.512514	0.707145	17.539	15.515	38.08	0.128389	0.512457	1.28062	0.705902	6.77567	0.0491435	38.8378	17.4668	15.5116	37.9485
485	[19]	Kerguelen Plateau (Skiff Bank)	ODP Leg 183, Site 1139	s 183-1139A-65R3,15-19	Trachyandesite, Basaltic	-50.185	63.94	68.3	[9]	10.4								0.512516	0.705952	17.556	15.524	38.128
486	[19]	Kerguelen Plateau (Skiff Bank)	ODP Leg 183, Site 1139	s 183-1139A-69R2,105-109	Trachyandesite, Basaltic	-50.185	63.94	68.3	[9]	4.24	12.6	60.4	54.3	468	0.99	4.18	6.51	0.512519	0.70594	17.537	15.501	38.054	0.126113	0.512463	0.335634	0.705614	9.47416	0.0687156	41.3383	17.4361	15.4962	37.9141
487	[19]	Kerguelen Plateau (Skiff Bank)	ODP Leg 183, Site 1139	s 183-1139A-65R3,15-19	Trachyandesite, Basaltic	-50.185	63.94	68.3	[9]	10.4	11.8	55.3	50.3	452	0.52	3.64	5.56	0.512523	0.70593	17.584	15.554	38.23	0.128998	0.512465	0.321915	0.705618	5.84893	0.042422	42.3102	17.5217	15.551	38.0868
488	[19]	Kerguelen Plateau (Skiff Bank)	ODP Leg 183, Site 1139	s 183-1139A-64R4,103-115	Trachybasalt / Basalt	-50.185	63.94	68.3	[9]	3.48	9.8	46.4	38.1	422	0.84	3.1	5.1	0.512524	0.705693	17.58	15.519	38.088	0.127684	0.512467	0.261164	0.70544	10.2746	0.0745214	39.185	17.4706	15.5138	37.9554
490	[19]	Kerguelen Plateau (Skiff Bank)	ODP Leg 183, Site 1139	s 183-1139A-66R3,2-10	Trachybasalt	-50.185	63.94	68.3	[9]	5.53	13	61.2	42.5	509	0.49	3.17	4.77	0.512545	0.705887	17.599	15.543	38.19	0.128417	0.512488	0.241535	0.705653	6.42108	0.0465717	42.9282	17.5306	15.5398	38.0447
491	[19]	Kerguelen Plateau (Skiff Bank)	ODP Leg 183, Site 1139	s 183-1139A-64R2,78-87	Trachyandesite, Basaltic	-50.185	63.94	68.3	[9]	5.98	12.4	60.3	63.1	480	0.91	3.81	6.95	0.51263	0.705832	17.505	15.503	38.041	0.12432	0.512574	0.380273	0.705463	8.15239	0.0591288	35.2728	17.4182	15.4989	37.9216
492	[19]	Kerguelen Plateau (Skiff Bank)	ODP Leg 183, Site 1139	s 183-1139A-67R4,35-41	Trachybasalt	-50.185	63.94	68.3	[9]	15.7	11.5	53.9	43.6	160	0.52	3.8	7.1	0.512763	0.706604	17.566	15.517	38.107	0.128991	0.512705	0.788328	0.705839	4.569	0.0331387	34.5043	17.5173	15.5147	37.9902
494	[19]	Kerguelen Plateau (Skiff Bank)	ODP Leg 183, Site 1139	s 183-1139A-64R2,78-87	Trachyandesite, Basaltic	-50.185	63.94	68.3	[9]	5.98									0.705895
489	[19]	Kerguelen Plateau (Skiff Bank)	ODP Leg 183, Site 1139	s 183-1139A-64R1,136-146	Trachyandesite, Basaltic / Basalt	-50.185	63.94	68.3	[9]	N/A	11.1	52.7	50.5	444	0.84	4.26	5.8	0.512527	0.70586	17.507	15.497	38.035	0.127333	0.51247	0.329016	0.705541	9.01611	0.0653933	47.252	17.411	15.4924	37.8751
493	[19]	Kerguelen Plateau (Skiff Bank)	ODP Leg 183, Site 1139	s 183-1139A-64R1,127-135	Trachyandesite, Basaltic	-50.185	63.94	68.3	[9]	N/A	11	53.2	50.3	443	0.82	4.21	5.9		0.705855	17.501	15.501	38.041	0.109896		0.328453	0.705536	8.65275	0.0627579	45.9085	17.4088	15.4966	37.8856
582	[47]	Ninetyeast Ridge	DSDP Leg 22, Site 216	s 22-216-38-2,143-150 / s 22-216-38-2143-150 / s 22-216-38-2,145-150	Basalt, Pyroxene / Basalt	1.4572	90.208	81	[81]	1.22	5.25	18.9	9.3	174	0.25	1.4	0.71	0.512652	0.705649	18.07	15.588	38.85	0.167934	0.512563	0.154608	0.705471	22.3673	0.162229	129.441	17.7872	15.5745	38.3302	17.7872	15.5745	0.705471	0.512563
607	[71][61]	Ninetyeast Ridge	ODP Leg 121, Site 756C	s 121-756C-10N-1,32-36	Basalt	-27.354	87.598	45	[80]	1.65	4.66	17.2	6.5	188	0.1	1.14	0.59	0.512902	0.703868	18.6704	15.5475	38.9793	0.163804	0.512854	0.0999953	0.703804	10.8671	0.0788187	128.024	18.5943	15.5439	38.694	18.5943	15.5439	0.703804	0.512854
612	[71][61]	Ninetyeast Ridge	ODP Leg 121, Site 756D	s 121-756D-12R-3,139-143	Basalt	-27.355	87.597	45	[80]	1.97	4.2	13.4	1.9	163	0.17	0.68	0.79	0.51285	0.703813	18.6626	15.5444	38.9423	0.189498	0.512794	0.0337122	0.703791	13.7882	0.100005	56.9952	18.566	15.5399	38.8153	18.566	15.5399	0.703791	0.512794
613	[61]	Ninetyeast Ridge	ODP Leg 121, Site 756D	s 121-756D-4R-1,35-39	Basalt	-27.355	87.597	45	[80]	1.65	4.81	16.9	10	195		1.14		0.512903	0.703916	18.711	15.5534	38.9803	0.172078	0.512852	0.148317	0.703821							18.711	15.5534	0.703821	0.512852
556	[66]	Ninetyeast Ridge	ODP Leg 121, Site 758A	s 11780-55R-5	Tholeiite, Olivine	5.384	90.361	83	[80]	N/A								0.512881	0.70474	18.778	15.521	38.879
557	[66]	Ninetyeast Ridge	ODP Leg 121, Site 758A	s 11788-58R-5	Tholeiite, Olivine	5.384	90.361	83	[80]	N/A								0.512831	0.70496	18.269	15.528	38.484
558	[66]	Ninetyeast Ridge	ODP Leg 121, Site 758A	s 11797-60R-7	Tholeiite, Olivine	5.384	90.361	83	[80]	N/A								0.5128	0.70473	18.842	15.589	38.882
559	[66]	Ninetyeast Ridge	ODP Leg 121, Site 758A	s 11804-63R-1	Tholeiite, Olivine	5.384	90.361	83	[80]	N/A								0.512765	0.70458
560	[66]	Ninetyeast Ridge	ODP Leg 121, Site 758A	s 11830-73R-1	Tholeiite, Olivine	5.384	90.361	83	[80]	N/A								0.512852	0.70463	18.478	15.547	38.705
561	[71]	Ninetyeast Ridge	ODP Leg 121, Site 758A	s 121-758A-54R-2,73-76	Basalt	5.384	90.361	83	[80]	N/A	2.1	6.3	0.9	148	0.11	0.28	0.55	0.51288	0.70488	18.627	15.582	38.79	0.201531	0.512771	0.0175893	0.704859	12.7889	0.092757	33.641	18.4613	15.5741	38.6516
573	[71][61]	Ninetyeast Ridge	ODP Leg 121, Site 758A	s 121-758A-70R-2,129-130	Basalt	5.384	90.361	83	[80]	N/A	2.2	7.8	0.5	125	0.12	0.25	0.33	0.51277	0.704351	18.4821	15.5652	38.7936	0.170522	0.512677	0.0115692	0.704337	23.2031	0.168291	49.9546	18.1814	15.5509	38.588
576	[71][61]	Ninetyeast Ridge	ODP Leg 121, Site 758A	s 121-758A-73R-1,82-86	Basalt	5.384	90.361	83	[80]	N/A	2.3	7	0	121	0.11	0.41	0.43	0.512886	0.704318	18.5197	15.5626	38.7785	0.198653	0.512778	0	0.704318	16.3274	0.118422	62.8898	18.3081	15.5525	38.5197
577	[71]	Ninetyeast Ridge	ODP Leg 121, Site 758A	s 121-758A-73R-3,50-54	Basalt	5.384	90.361	83	[80]	N/A	2.4	8.8	0.4	115	0.11	0.35	0.34		0.70483	18.547	15.588	38.88	0.144954		0.0100607	0.704818	20.6926	0.150082	68.0395	18.2789	15.5752	38.6
578	[71][61]	Ninetyeast Ridge	ODP Leg 121, Site 758A	s 121-758A-73R-4,105-109	Basalt	5.384	90.361	83	[80]	N/A	2.5	8.3	1.5	113	0.11	0.26	1.46	0.512876	0.704343	18.5943	15.5591	38.8064	0.182106	0.512777	0.0383934	0.704298	4.81519	0.0349243	11.7616	18.5319	15.5561	38.758
562	[71][61]	Ninetyeast Ridge	ODP Leg 121, Site 758A	s 121-758A-55R-5,82-86	Basalt	5.384	90.361	83	[80]	2.06	1.8	4.7	0.4	122	0.07	0.17	0.13	0.512888	0.704405	18.4879	15.5421	38.729	0.231547	0.512762	0.00948303	0.704394	34.3202	0.248923	86.1334	18.0432	15.5209	38.3746
563	[71][61]	Ninetyeast Ridge	ODP Leg 121, Site 758A	s 121-758A-56R-1,64-68	Basalt	5.384	90.361	83	[80]	2.39	2.1	5	1.4	127	0.08	0.23	0.21	0.512876	0.704416	18.4691	15.5467	38.6945	0.253929	0.512738	0.0318839	0.704378	24.2649	0.175992	72.0921	18.1547	15.5317	38.3979
564	[71][61]	Ninetyeast Ridge	ODP Leg 121, Site 758A	s 121-758A-58R-6,21-25	Basalt	5.384	90.361	83	[80]	4.48	4.2	14.2	1.1	143	0.17	0.73	0.53	0.51291	0.704426	18.3261	15.5689	38.6178	0.178825	0.512813	0.0222487	0.7044	20.376	0.147786	90.4199	18.0621	15.5563	38.2457
565	[71][61]	Ninetyeast Ridge	ODP Leg 121, Site 758A	s 121-758A-59R-2,58-62	Basalt	5.384	90.361	83	[80]	3.29	2.4	7.6	2.2	127	0.04	0.29	0.2	0.512854	0.704425	18.3307	15.5688	38.6269	0.190923	0.51275	0.0501033	0.704366	12.7074	0.092166	95.2063	18.166	15.5609	38.2351
566	[71][61]	Ninetyeast Ridge	ODP Leg 121, Site 758A	s 121-758A-60R-1,122-126	Basalt	5.384	90.361	83	[80]	3.82	2.6	9	0.6	131	0.14	0.43	0.32	0.512857	0.704482	18.6862	15.5852	38.9657	0.174659	0.512762	0.0132474	0.704466	28.0658	0.20356	89.0817	18.3225	15.5679	38.5991
567	[71][61]	Ninetyeast Ridge	ODP Leg 121, Site 758A	s 121-758A-62R-1,130-134	Basalt	5.384	90.361	83	[80]	3.18	1.7	5.5	0.9	139	0.08	0.23	0.56		0.704475	18.6421	15.5706	38.9323	0.164281		0.0187274	0.704453	9.15298	0.0663861	27.1939	18.5235	15.5649	38.8204
568	[71][61]	Ninetyeast Ridge	ODP Leg 121, Site 758A	s 121-758A-62R-3,80-84	Basalt	5.384	90.361	83	[80]	5.38	3.4	10.9	0.7	157	0.2	0.27	0.51	0.512865	0.704502	18.6334	15.5729	38.8938	0.188588	0.512763	0.0128958	0.704487	25.1106	0.182126	35.0317	18.308	15.5574	38.7496
569	[71][61]	Ninetyeast Ridge	ODP Leg 121, Site 758A	s 121-758A-65R-1,51-55	Basalt	5.384	90.361	83	[80]	5.76	2.6	9	0.4	157	0.12	0.33	0.3	0.512871	0.704425	18.5804	15.5635	38.871	0.17466	0.512776	0.00736899	0.704416	25.5834	0.185555	72.7047	18.2489	15.5477	38.5718
570	[71][61]	Ninetyeast Ridge	ODP Leg 121, Site 758A	s 121-758A-67R-4,31-35	Basalt	5.384	90.361	83	[80]	5.12	10.4	0.19	0.2	144	0.13	2.7	0.75	0.51287	0.70444	18.4967	15.5535	38.7987	33.0935	0.494901	0.00401713	0.704435	11.0613	0.0802272	237.41	18.3534	15.5467	37.8218
571	[71][61]	Ninetyeast Ridge	ODP Leg 121, Site 758A	s 121-758A-69R-3,53-57	Basalt	5.384	90.361	83	[80]	4.35	2.4	8.3	0.7	114	0.1	0.28	0.21	0.512871	0.70439	18.5748	15.5598	38.8016	0.174822	0.512776	0.0177599	0.704369	30.424	0.220664	88.033	18.1805	15.541	38.4394
572	[71][61]	Ninetyeast Ridge	ODP Leg 121, Site 758A	s 121-758A-70R-1,71-75	Basalt	5.384	90.361	83	[80]	6.15	2.3	8.3	0.1	140	0.12	0.22	0.41		0.704425	18.5264	15.562	38.8358	0.147282		0.00206595	0.704423	18.6967	0.135606	35.4223	18.2841	15.5504	38.69
574	[71][61]	Ninetyeast Ridge	ODP Leg 121, Site 758A	s 121-758A-71R-1,127-131	Basalt	5.384	90.361	83	[80]	5.24	2.1	7.9	0.8	130	0.11	0.27	0.3	0.512867	0.704345	18.524	15.5721	38.8112	0.160714	0.51278	0.0177988	0.704324	23.4174	0.169845	59.3993	18.2205	15.5576	38.5668
575	[71][61]	Ninetyeast Ridge	ODP Leg 121, Site 758A	s 121-758A-71R-3,64-68	Basalt	5.384	90.361	83	[80]	4.15	2.3	7.3	0.1	122	0.11	0.33	0.37	0.512886	0.704335	18.4952	15.5659	38.8528	0.190489	0.512783	0.00237074	0.704332	18.9889	0.137725	58.8697	18.2491	15.5542	38.6106
579	[66]	Ninetyeast Ridge	DSDP Leg 22, Site 216	s 11662-37-1	Basalt	1.4572	90.208	81	[81]	N/A								0.512629		18.08	15.561	38.805
580	[66]	Ninetyeast Ridge	DSDP Leg 22, Site 216	s 11664-38-1	Basalt	1.4572	90.208	81	[81]	N/A										18.132	15.541	38.686
581	[47]	Ninetyeast Ridge	DSDP Leg 22, Site 216	s 22-216-37-2,80 / s 22-216-37-280	Basalt	1.4572	90.208	81	[81]	4.06	4.97	19.7	2.6	177	0.46	1.21	0.86	0.512652	0.705454	18.09	15.585	38.81	0.152521	0.512571	0.0424905	0.705405	33.9667	0.246359	92.332	17.6605	15.5645	38.4392
583	[66]	Ninetyeast Ridge	DSDP Leg 22, Site 214	s 11670-48-1	Basalt	-11.337	88.718	59	[81]	N/A									0.70486	18.346	15.579	38.75
584	[66]	Ninetyeast Ridge	DSDP Leg 22, Site 214	s 11674-51-1	Basalt	-11.337	88.718	59	[81]	N/A								0.512833		18.343	15.566	38.722
585	[69][47]	Ninetyeast Ridge	DSDP Leg 22, Site 214	s 22-214-53-1,30-35 / s 22-214-53-1(30-35) / s 22-214-53-130-35	Basalt, Pyroxene / Basalt	-11.337	88.718	59	[81]	8.56			3.55	220	0.04		0.28	0.512896	0.70407	18.32	15.58	38.44			0.04667	0.704031
586	[66]	Ninetyeast Ridge	ODP Leg 121, Site 757C	s 11753-9R-2	Tholeiite, Olivine	-17.023	88.03	56	[80]	N/A										18.662	15.561	38.876
587	[66]	Ninetyeast Ridge	ODP Leg 121, Site 757C	s 11756-9R-6	Tholeiite, Olivine	-17.023	88.03	56	[80]	N/A								0.512737	0.706
588	[66]	Ninetyeast Ridge	ODP Leg 121, Site 757C	s 11765-10R-3	Tholeiite, Olivine	-17.023	88.03	56	[80]	N/A									0.70546	18.968	15.574	38.93
589	[66]	Ninetyeast Ridge	ODP Leg 121, Site 757C	s 11773-12R-1	Tholeiite, Olivine	-17.023	88.03	56	[80]	N/A								0.512765	0.70444	18.82	15.565	39.029
590	[66]	Ninetyeast Ridge	ODP Leg 121, Site 757C	s 11775-12R-3	Tholeiite, Olivine	-17.023	88.03	56	[80]	N/A									0.70485	18.679	15.554	38.99
600	[71][61]	Ninetyeast Ridge	ODP Leg 121, Site 757C	s 121-757C-9R-6,102-105	Basalt	-17.023	88.03	56	[80]	N/A	1.7	4.6	35	215	0.16	0.28	0.53		0.704654	18.7213	15.5798	38.9177	0.196423		0.470855	0.704279	19.3613	0.140426	35.0141	18.5524	15.5718	38.8206
591	[71][61]	Ninetyeast Ridge	ODP Leg 121, Site 757C	s 121-757C-10R-2,86-90	Basalt	-17.023	88.03	56	[80]	5.7	1.1	4	17	247	0.11	0.09	0.28	0.512802	0.704707	18.7946	15.5921	38.982	0.16626	0.512741	0.199073	0.704549	25.2464	0.183111	21.3462	18.5743	15.5817	38.9228
592	[71][61]	Ninetyeast Ridge	ODP Leg 121, Site 757C	s 121-757C-10R-3,2-6	Basalt	-17.023	88.03	56	[80]	7.69	1.6	5.9	17	559	0.13	0.25	0.29	0.512799	0.705775	19.1841	15.6122	39.1105	0.163955	0.512739	0.0879715	0.705705	29.0155	0.210448	57.6631	18.9309	15.6003	38.9505
593	[71][61]	Ninetyeast Ridge	ODP Leg 121, Site 757C	s 121-757C-11R-2,10-14	Basalt	-17.023	88.03	56	[80]	7.9	1.8	6.1	19	324	0.19	0.35	0.49	0.512808	0.704776	18.7584	15.5898	39.0155	0.178402	0.512743	0.169618	0.704641	24.917	0.180721	47.433	18.541	15.5796	38.8839
594	[71][61]	Ninetyeast Ridge	ODP Leg 121, Site 757C	s 121-757C-11R-2,51-56	Basalt	-17.023	88.03	56	[80]	7.15	1.7	6	20	292	0.18	0.34	0.46	0.512811	0.705589	18.9097	15.5906	39.022	0.171299	0.512748	0.198127	0.705431	25.1984	0.182762	49.1869	18.6898	15.5802	38.8855
595	[71][61]	Ninetyeast Ridge	ODP Leg 121, Site 757C	s 121-757C-12R-1,100-104	Basalt	-17.023	88.03	56	[80]	2.57	3.8	14.4	7.8	164	0.3	1.53	0.37	0.512818	0.704427	18.8259	15.5774	39.0713	0.159543	0.51276	0.137562	0.704318	52.1799	0.378458	275.007	18.3706	15.5559	38.3083
596	[71][61]	Ninetyeast Ridge	ODP Leg 121, Site 757C	s 121-757C-12R-2,0-5	Basalt	-17.023	88.03	56	[80]	2.02	3.7	14.3	20	160	0.45	1.48	0.79	0.512822	0.704518	18.7548	15.5709	39.0466	0.156431	0.512765	0.361544	0.70423	36.6078	0.265515	124.421	18.4354	15.5558	38.7014
597	[71][61]	Ninetyeast Ridge	ODP Leg 121, Site 757C	s 121-757C-12R-4,24-29	Basalt	-17.023	88.03	56	[80]	5.13	1.3	16	14	150	0.47	1.89	1.35	0.51281	0.704886	18.8101	15.5744	39.1964	0.0491224	0.512792	0.269963	0.704671	22.4373	0.162736	93.2407	18.6143	15.5652	38.9377
598	[71][61]	Ninetyeast Ridge	ODP Leg 121, Site 757C	s 121-757C-9R-1,105-109	Basalt	-17.023	88.03	56	[80]	2.38	1.6	5.7	1.4	176	0.04	0.33	0.14	0.512799	0.704396	18.6986	15.5804	38.9499	0.169707	0.512737	0.0230071	0.704378	18.3266	0.132922	156.245	18.5387	15.5729	38.5164
599	[71][61]	Ninetyeast Ridge	ODP Leg 121, Site 757C	s 121-757C-9R-5,34-38	Basalt	-17.023	88.03	56	[80]	4.05	1.4	5.2	11	313	0.13	0.24	0.37	0.512792	0.704525	18.7749	15.5965	38.9921	0.162772	0.512732	0.101648	0.704444	22.5776	0.163754	43.0741	18.5779	15.5872	38.8726
601	[71][61]	Ninetyeast Ridge	ODP Leg 121, Site 757C	s 121-757C-9R-7,78-82	Basalt	-17.023	88.03	56	[80]	2.58	1.5	5.3	18	181	0.15	0.43	0.38	0.512794	0.704501	18.7155	15.5809	38.9496	0.171108	0.512731	0.287637	0.704272	25.3255	0.183684	75.0249	18.4945	15.5705	38.7414
602	[71][61]	Ninetyeast Ridge	ODP Leg 121, Site 757C	s 121-757C-9R-8,54-59	Basalt	-17.023	88.03	56	[80]	2.92	1.4	5.1	22	184	0.11	0.24	0.34	0.512788	0.704653	18.6941	15.5785	38.9295	0.165963	0.512727	0.34583	0.704378	20.7447	0.15046	46.7731	18.5131	15.57	38.7997
603	[66]	Ninetyeast Ridge	DSDP Leg 26, Site 253	s 26-253-24-1	Basalt, Olivine	-24.878	87.366	49	[4]	N/A								0.512873		18.709	15.552	38.549
604	[66]	Ninetyeast Ridge	DSDP Leg 26, Site 253	s 11404-58CC	Basalt, Olivine	-24.878	87.366	49	[4]	N/A								0.512787		18.768	15.588	38.659
605	[47]	Ninetyeast Ridge	DSDP Leg 26, Site 253	s 26-253-58CC#3	Picrite	-24.878	87.366	49	[4]	N/A	1.96	4.9	1.6	70.8	0.01		0.09		0.704738	18.61	15.593	38.76	0.212599		0.0653654	0.704693
611	[71][61]	Ninetyeast Ridge	ODP Leg 121, Site 756D	s 121-756D-10R-1,99-103	Basalt	-27.355	87.597	45	[80]	3.1	3.89	13.5	16	156	0.24	0.66	0.86	0.51289	0.703891	18.6924	15.5481	38.9941	0.174213	0.512839	0.296634	0.703701	17.9018	0.129841	50.8747	18.567	15.5422	38.8807
615	[71][61]	Ninetyeast Ridge	ODP Leg 121, Site 756D	s 121-756D-6R-1,6-10	Basalt	-27.355	87.597	45	[80]	3.17	5.4	18.7	19	166	0.08	1.7	0.4	0.512893	0.703895	18.663	15.5444	38.9636	0.174589	0.512842	0.331032	0.703683	12.8187	0.0929732	281.497	18.5732	15.5402	38.3362
616	[71][61]	Ninetyeast Ridge	ODP Leg 121, Site 756D	s 121-756D-6R-2,13-17	Basalt	-27.355	87.597	45	[80]	2.45	4.18	14	1.1	174	0.09	0.7	0.37		0.70389	18.6958	15.5506	39.0284	0.15869		0.0182839	0.703878	15.6121	0.113234	125.484	18.5864	15.5455	38.7487
617	[71][61]	Ninetyeast Ridge	ODP Leg 121, Site 756D	s 121-756D-6R-2,9-13	Basalt	-27.355	87.597	45	[80]	2.68	3.97	12.9	33	171	0.09	0.71	0.41	0.512886	0.703899	18.7011	15.5522	39.0452	0.186065	0.512831	0.55814	0.703542	14.0935	0.102219	114.896	18.6024	15.5476	38.7891
618	[71][61]	Ninetyeast Ridge	ODP Leg 121, Site 756D	s 121-756D-7R-1,100-104	Basalt	-27.355	87.597	45	[80]	2.63	4.67	16.8	2.9	200	0.38	1.01	0.8	0.512878	0.703951	18.6859	15.5536	38.9931	0.168063	0.512829	0.0419368	0.703924	30.4696	0.220995	83.6904	18.4725	15.5436	38.8066
619	[71][61]	Ninetyeast Ridge	ODP Leg 121, Site 756D	s 121-756D-8R-1,20-23	Basalt	-27.355	87.597	45	[80]	4.12	3.93	14.5	13	153	0.22	0.75	0.93	0.51282	0.704379	18.7232	15.5756	39.2427	0.163863	0.512772	0.245752	0.704222	15.2377	0.110519	53.6822	18.6165	15.5706	39.1231
614	[71][61]	Ninetyeast Ridge	ODP Leg 121, Site 756D	s 121-756D-4R-1,85-89	Basalt	-27.355	87.597	45	[80]	N/A	5.1	16.8	15	181	0.1	1.33	0.56	0.512902	0.703899	18.6918	15.5457	38.9684	0.183538	0.512848	0.239683	0.703746	11.4506	0.0830506	157.381	18.6116	15.5419	38.6176
606	[66]	Ninetyeast Ridge	ODP Leg 121, Site 756C	s 11727-10N-2	Tholeiite, Olivine	-27.354	87.598	45	[80]	N/A								0.512881	0.70406	18.667	15.516	38.926
608	[66]	Ninetyeast Ridge	ODP Leg 121, Site 756D	s 11729-4R-1	Tholeiite, Olivine	-27.355	87.597	45	[80]	N/A									0.70417	18.754	15.521	38.906
609	[66]	Ninetyeast Ridge	ODP Leg 121, Site 756D	s 11735-6R-3	Tholeiite, Olivine	-27.355	87.597	45	[80]	N/A										18.633	15.524	38.883
610	[66]	Ninetyeast Ridge	ODP Leg 121, Site 756D	s 11737-7R-2	Tholeiite, Olivine	-27.355	87.597	45	[80]	N/A								0.512829	0.70417	18.768	15.521	38.944
622	[47]	Ninetyeast Ridge	DSDP Leg 26, Site 254	s 26-254-31-1:88-90 / s 254-31-188-90	Tholeiite / Basalt	-30.969	87.895	37	[81]	5.24	4.33	16	1.5	185	0.05		0.27	0.512757	0.704494	18.06	15.506	38.52	0.163613	0.512717	0.0234515	0.704482
620	[66]	Ninetyeast Ridge	DSDP Leg 26, Site 254	s 10666-31-1	Basalt	-30.969	87.895	37	[81]	N/A								0.512759	0.70465	18.03	15.501	38.55
621	[66]	Ninetyeast Ridge	DSDP Leg 26, Site 254	s 10669-38-1	Basalt	-30.969	87.895	37	[81]	N/A								0.512785		18.079	15.511	38.623
694	[168][170][121]	Indian Ocean Spreading Ridges	Southeast Indian Ridge	ARGDODO-113	Tholeiite	-23.343	79.942	0	N/A										0.7032
695	[89]	Indian Ocean Spreading Ridges	Southeast Indian Ridge	ARGDODO-113-A1	Basalt	-23.343	74.942	0	N/A		3.41	9.71						0.513181	0.70319				0.212339	0.513181											0.70319	0.513181
696	[168][169][170]	Indian Ocean Spreading Ridges	Southeast Indian Ridge	ARGDODO-114	Tholeiite	-24.117	72.433	0	N/A	N/A	2.08								0.7033	18.21	15.57	38.22											18.21	15.57
698	[102]	Indian Ocean Spreading Ridges	Southeast Indian Ridge	CHRHYAM-001-005	Tholeiite	-40.34	78.65	0	N/A	N/A	2.06	5.85						0.513032	0.70343	18.02	15.518	37.985	0.212907	0.513032									18.02	15.518	0.70343	0.513032
699	[102]	Indian Ocean Spreading Ridges	Southeast Indian Ridge	CHRHYAM-002	Tholeiite	-39.68	78.48	0	N/A	N/A	4.18	14						0.512854	0.70405	18.085	15.561	38.445	0.180513	0.512854									18.085	15.561	0.70405	0.512854
700	[102]	Indian Ocean Spreading Ridges	Southeast Indian Ridge	CHRHYAM-003-003	Basalt	-37.52	78.43	0	N/A	N/A	5.9	23						0.512822	0.70411	18.738	15.576	39.009	0.155089	0.512822									18.738	15.576	0.70411	0.512822
701	[102]	Indian Ocean Spreading Ridges	Southeast Indian Ridge	CHRHYAM-004-043	Tholeiite	-34.91	78.67	0	N/A	N/A	2.48	7.7						0.512991	0.70312	18.331	15.53	38.215	0.194731	0.512991									18.331	15.53	0.70312	0.512991
702	[102]	Indian Ocean Spreading Ridges	Southeast Indian Ridge	CHRHYAM-004-062	Tholeiite	-34.91	78.67	0	N/A	N/A	1.82	4.8						0.512899	0.70367	18.411	15.568	38.36	0.229243	0.512899									18.411	15.568	0.70367	0.512899
703	[102]	Indian Ocean Spreading Ridges	Southeast Indian Ridge	CHRHYAM-005-001	Tholeiite	-34.96	78.54	0	N/A	N/A	2.14	6.45						0.512963	0.70321	18.406	15.551	38.37	0.200598	0.512963									18.406	15.551	0.70321	0.512963
704	[102]	Indian Ocean Spreading Ridges	Southeast Indian Ridge	CHRHYAM-006-025	Tholeiite	-32.51	77.43	0	N/A	N/A	3.09	8.99						0.513083	0.70296	17.952	15.477	37.826	0.207818	0.513083									17.952	15.477	0.70296	0.513083
705	[102]	Indian Ocean Spreading Ridges	Southeast Indian Ridge	CHRHYAM-007-002	Tholeiite	-31.26	76.5	0	N/A	N/A	2.75	8.25						0.513056	0.70283	17.884	15.467	37.726	0.20154	0.513056									17.884	15.467	0.70283	0.513056
706	[102]	Indian Ocean Spreading Ridges	Southeast Indian Ridge	CHRHYAM-009-007	Tholeiite	-30.33	75.76	0	N/A	N/A	3.18	9.4						0.513073	0.70287	17.927	15.467	37.726	0.204542	0.513073									17.927	15.467	0.70287	0.513073
707	[102]	Indian Ocean Spreading Ridges	Southeast Indian Ridge	CHRHYAM-009-008	Tholeiite	-30.33	75.76	0	N/A	N/A	3.19	9.43						0.513059	0.70288	17.908	15.483	37.783	0.204532	0.513059									17.908	15.483	0.70288	0.513059
708	[102]	Indian Ocean Spreading Ridges	Southeast Indian Ridge	CHRHYAM-010-014	Tholeiite	-28.9	74.67	0	N/A	N/A	1.76	5.1						0.513077	0.70302	17.925	15.509	37.822	0.208654	0.513077									17.925	15.509	0.70302	0.513077
709	[102]	Indian Ocean Spreading Ridges	Southeast Indian Ridge	CHRHYAM-STPAUL	Tholeiite	-38.7	77.5	0	N/A	N/A	3.39	13.41						0.512925	0.70363	18.696	15.583	38.802	0.152841	0.512925									18.696	15.583	0.70363	0.512925
710	[103]	Indian Ocean Spreading Ridges	Southeast Indian Ridge	DUF0023-002	Basalt	-26.521	71.925	0	N/A	N/A									0.70332	17.541	15.423	37.42											17.541	15.423
711	[148]	Indian Ocean Spreading Ridges	Southeast Indian Ridge	DUF0023-002-001	Basalt	-26.521	71.925	0	N/A	N/A	2.26	6.33						0.513047	0.70308	17.62	15.443	37.57	0.215867	0.513047									17.62	15.443	0.70308	0.513047
712	[114]	Indian Ocean Spreading Ridges	Southeast Indian Ridge	DUF0037-001-001	Tholeiite	-26.917	72.242	0	N/A	N/A								0.512941	0.70315	17.692	15.442	37.654											17.692	15.442	0.70315	0.512941
713	[148]	Indian Ocean Spreading Ridges	Southeast Indian Ridge	DUF0037-001-006	Basalt	-26.917	72.242	0	N/A	N/A	2.24	6.56						0.513018	0.703146	17.666	15.437	37.67	0.206453	0.513018									17.666	15.437	0.703146	0.513018
714	[114]	Indian Ocean Spreading Ridges	Southeast Indian Ridge	DUF0037-002-001	Tholeiite	-29.7	75.191	0	N/A	N/A									0.70294	17.8	15.441	37.665											17.8	15.441
715	[148]	Indian Ocean Spreading Ridges	Southeast Indian Ridge	DUF0037-002-001	Basalt	-29.7	75.191	0	N/A	N/A	2.87	8.5						0.513044	0.70289	17.817	15.447	37.75	0.204147	0.513044									17.817	15.447	0.70289	0.513044
716	[114]	Indian Ocean Spreading Ridges	Southeast Indian Ridge	DUF0037-003-001	Tholeiite	-26.92	72.24	0	N/A	N/A								0.513028	0.70305	17.635	15.457	37.493											17.635	15.457	0.70305	0.513028
717	[163]	Indian Ocean Spreading Ridges	Southeast Indian Ridge	DUF0037-003-001-D1	Basalt	-26.92	72.24	0	N/A	N/A	2.24	6.56						0.513007					0.206453	0.513007
718	[114]	Indian Ocean Spreading Ridges	Southeast Indian Ridge	DUF0037-004-001	Tholeiite	-32.665	77.596	0	N/A	N/A								0.513053	0.703	17.854	15.429	37.728											17.854	15.429	0.703	0.513053
719	[148]	Indian Ocean Spreading Ridges	Southeast Indian Ridge	DUF0037-004-001	Basalt	-32.665	77.596	0	N/A	N/A	2.55	7.81						0.51301	0.702982	18	15.489	38.04	0.197409	0.51301									18	15.489	0.702982	0.51301
720	[114]	Indian Ocean Spreading Ridges	Southeast Indian Ridge	DUF0037-005-001	Tholeiite	-40.327	77.855	0	N/A	N/A								0.513122	0.70296	17.96	15.446	37.912											17.96	15.446	0.70296	0.513122
721	[114]	Indian Ocean Spreading Ridges	Southeast Indian Ridge	DUF0037-006-002	Tholeiite	-38.978	78.138	0	N/A	N/A	3.19	10.79						0.512821	0.70463	18.008	15.555	38.636	0.178742	0.512821									18.008	15.555	0.70463	0.512821
722	[114]	Indian Ocean Spreading Ridges	Southeast Indian Ridge	DUF0037-006-003	Tholeiite	-38.957	78.158	0	N/A	N/A								0.512605	0.70536	17.736	15.549	38.477											17.736	15.549	0.70536	0.512605
723	[114]	Indian Ocean Spreading Ridges	Southeast Indian Ridge	DUF0037-007-001	Tholeiite	-34.383	78.023	0	N/A	N/A								0.51296	0.70311	18.388	15.503	38.409											18.388	15.503	0.70311	0.51296
724	[114]	Indian Ocean Spreading Ridges	Southeast Indian Ridge	DUF0037-007-002	Tholeiite	-34.385	78.013	0	N/A	N/A										18.155	15.466	38.103											18.155	15.466
725	[116]	Indian Ocean Spreading Ridges	Southeast Indian Ridge	DUF0171-DR-B001-004	Basalt	-42.33	89.69	0	N/A	N/A										17.8959	15.4718	37.6701											17.8959	15.4718
726	[116]	Indian Ocean Spreading Ridges	Southeast Indian Ridge	DUF0171-DR-B002-009	Basalt	-42.23	89.54	0	N/A	N/A										17.9629	15.495	37.6986											17.9629	15.495
727	[116]	Indian Ocean Spreading Ridges	Southeast Indian Ridge	DUF0171-DR-B003-001	Basalt	-41.96	89.15	0	N/A	N/A										18.1151	15.5447	38.0839											18.1151	15.5447
728	[116]	Indian Ocean Spreading Ridges	Southeast Indian Ridge	DUF0171-DR-B005-001	Basalt	-43.34	91.5	0	N/A	N/A										17.8894	15.4722	37.5998											17.8894	15.4722
729	[116]	Indian Ocean Spreading Ridges	Southeast Indian Ridge	DUF0171-DR-B006-001	Basalt	-42.98	90.95	0	N/A	N/A										18.042	15.4841	37.9118											18.042	15.4841
730	[116]	Indian Ocean Spreading Ridges	Southeast Indian Ridge	DUF0171-DR-B007-002	Basalt	-42.65	90.34	0	N/A	N/A										17.9065	15.4696	37.62											17.9065	15.4696
731	[116]	Indian Ocean Spreading Ridges	Southeast Indian Ridge	DUF0171-DR-B008-001	Basalt	-42.56	90.17	0	N/A	N/A										17.9329	15.4734	37.6412											17.9329	15.4734
732	[116]	Indian Ocean Spreading Ridges	Southeast Indian Ridge	DUF0171-DR-B009-001	Basalt	-43.8	93.02	0	N/A	N/A										17.8986	15.5182	37.6263											17.8986	15.5182
733	[116]	Indian Ocean Spreading Ridges	Southeast Indian Ridge	DUF0171-DR-B009-002	Basalt	-43.8	93.02	0	N/A	N/A										17.8979	15.5181	37.6259											17.8979	15.5181
734	[116]	Indian Ocean Spreading Ridges	Southeast Indian Ridge	DUF0171-DR-B010-002	Basalt	-43.35	92.23	0	N/A	N/A										17.8681	15.4864	37.5861											17.8681	15.4864
735	[116]	Indian Ocean Spreading Ridges	Southeast Indian Ridge	DUF0171-DR-B011-001	Basalt	-43.35	92.23	0	N/A	N/A										17.8855	15.4699	37.596											17.8855	15.4699
736	[116]	Indian Ocean Spreading Ridges	Southeast Indian Ridge	DUF0171-DR-B011-002	Basalt	-43.35	91.86	0	N/A	N/A										17.8857	15.4703	37.5957											17.8857	15.4703
737	[116]	Indian Ocean Spreading Ridges	Southeast Indian Ridge	DUF0171-DR-B012-001	Basalt	-44.08	93.65	0	N/A	N/A										17.8682	15.4681	37.4612											17.8682	15.4681
738	[116]	Indian Ocean Spreading Ridges	Southeast Indian Ridge	DUF0171-DR-B013-002	Basalt	-44.6	94.43	0	N/A	N/A										17.8673	15.4764	37.5159											17.8673	15.4764
739	[116]	Indian Ocean Spreading Ridges	Southeast Indian Ridge	DUF0171-DR-B014-001	Basalt	-44.27	94.15	0	N/A	N/A										18.488	15.5157	38.2353											18.488	15.5157
740	[116]	Indian Ocean Spreading Ridges	Southeast Indian Ridge	DUF0171-DR-B015-002	Basalt	-44.19	93.94	0	N/A	N/A										17.8417	15.4726	37.5253											17.8417	15.4726
741	[116]	Indian Ocean Spreading Ridges	Southeast Indian Ridge	DUF0171-DR-C001-001	Basalt	-48.13	99.18	0	N/A	N/A										17.9164	15.4806	37.6669											17.9164	15.4806
742	[116]	Indian Ocean Spreading Ridges	Southeast Indian Ridge	DUF0171-DR-C001-002	Basalt	-48.13	99.18	0	N/A	N/A										17.9159	15.48	37.6644											17.9159	15.48
743	[116]	Indian Ocean Spreading Ridges	Southeast Indian Ridge	DUF0171-DR-C002-002	Basalt	-47.9	98.55	0	N/A	N/A										17.9041	15.4805	37.6684											17.9041	15.4805
744	[116]	Indian Ocean Spreading Ridges	Southeast Indian Ridge	DUF0171-DR-C003-004	Basalt	-47.83	98.42	0	N/A	N/A										17.8966	15.4794	37.6981											17.8966	15.4794
745	[116]	Indian Ocean Spreading Ridges	Southeast Indian Ridge	DUF0171-DR-C004-001	Basalt	-46.95	96.69	0	N/A	N/A										17.8058	15.4731	37.6371											17.8058	15.4731
746	[116]	Indian Ocean Spreading Ridges	Southeast Indian Ridge	DUF0171-DR-C005-012	Basalt	-46.09	95.93	0	N/A	N/A										17.8229	15.469	37.4754											17.8229	15.469
747	[116]	Indian Ocean Spreading Ridges	Southeast Indian Ridge	DUF0171-DR-C006-002	Basalt	-45.95	95.73	0	N/A	N/A										17.8729	15.4703	37.5551											17.8729	15.4703
748	[116]	Indian Ocean Spreading Ridges	Southeast Indian Ridge	DUF0171-DR-C006-006	Basalt	-45.95	95.73	0	N/A	N/A										17.8785	15.468	37.559											17.8785	15.468
749	[116]	Indian Ocean Spreading Ridges	Southeast Indian Ridge	DUF0171-DR-C007-002	Basalt	-46.18	95.97	0	N/A	N/A										17.8533	15.4646	37.5557											17.8533	15.4646
750	[116]	Indian Ocean Spreading Ridges	Southeast Indian Ridge	DUF0171-DR-C007-003	Basalt	-46.18	95.97	0	N/A	N/A										17.8279	15.4605	37.5359											17.8279	15.4605
751	[116]	Indian Ocean Spreading Ridges	Southeast Indian Ridge	DUF0171-DR-C008-001	Basalt	-45.83	96.12	0	N/A	N/A										17.7729	15.4586	37.3603											17.7729	15.4586
752	[116]	Indian Ocean Spreading Ridges	Southeast Indian Ridge	DUF0171-WW10-067-013	Basalt	-41.89	89.19	0	N/A	N/A										18.0578	15.4825	37.9069											18.0578	15.4825
753	[116]	Indian Ocean Spreading Ridges	Southeast Indian Ridge	DUF0171-WW10-079-019	Basalt	-45.11	95.41	0	N/A	N/A										17.8662	15.4879	37.5548											17.8662	15.4879
754	[116]	Indian Ocean Spreading Ridges	Southeast Indian Ridge	DUF0171-WW10-083	Basalt	-45.05	95.76	0	N/A	N/A										18.1206	15.4992	37.9203											18.1206	15.4992
755	[116]	Indian Ocean Spreading Ridges	Southeast Indian Ridge	DUF0171-WW10-085	Basalt	-45.19	96.12	0	N/A	N/A										17.84	15.4722	37.5927											17.84	15.4722
756	[116]	Indian Ocean Spreading Ridges	Southeast Indian Ridge	DUF0171-WW10-090-001	Basalt	-47.71	98.16	0	N/A	N/A										17.8328	15.4749	37.5696											17.8328	15.4749
757	[116]	Indian Ocean Spreading Ridges	Southeast Indian Ridge	DUF0171-WW10-090-016	Basalt	-47.71	98.16	0	N/A	N/A										17.8294	15.4762	37.5683											17.8294	15.4762
758	[116]	Indian Ocean Spreading Ridges	Southeast Indian Ridge	DUF0171-WXC-A002	Basalt	-41.89	87.72	0	N/A	N/A										17.8987	15.4899	37.9453											17.8987	15.4899
759	[116]	Indian Ocean Spreading Ridges	Southeast Indian Ridge	DUF0171-WXC-B002	Basalt	-42.17	89.41	0	N/A	N/A										17.9807	15.4777	37.7676											17.9807	15.4777
760	[116]	Indian Ocean Spreading Ridges	Southeast Indian Ridge	DUF0171-WXC-B005	Basalt	-41.92	89.06	0	N/A	N/A										18.0245	15.4859	37.9059											18.0245	15.4859
761	[116]	Indian Ocean Spreading Ridges	Southeast Indian Ridge	DUF0171-WXC-B007	Basalt	-41.7	88.7	0	N/A	N/A										18.0498	15.4855	37.9225											18.0498	15.4855
762	[116]	Indian Ocean Spreading Ridges	Southeast Indian Ridge	DUF0171-WXC-B008	Basalt	-43.27	91.48	0	N/A	N/A										17.8527	15.4678	37.5135											17.8527	15.4678
763	[116]	Indian Ocean Spreading Ridges	Southeast Indian Ridge	DUF0171-WXC-B012	Basalt	-43.04	91.04	0	N/A	N/A										17.841	15.4635	37.5114											17.841	15.4635
764	[116]	Indian Ocean Spreading Ridges	Southeast Indian Ridge	DUF0171-WXC-B013	Basalt	-42.83	90.84	0	N/A	N/A										17.8354	15.4633	37.4884											17.8354	15.4633
765	[116]	Indian Ocean Spreading Ridges	Southeast Indian Ridge	DUF0171-WXC-B014	Basalt	-42.83	90.68	0	N/A	N/A										17.7824	15.4573	37.4902											17.7824	15.4573
766	[116]	Indian Ocean Spreading Ridges	Southeast Indian Ridge	DUF0171-WXC-B015	Basalt	-42.78	90.6	0	N/A	N/A										17.8214	15.4608	37.5029											17.8214	15.4608
767	[116]	Indian Ocean Spreading Ridges	Southeast Indian Ridge	DUF0171-WXC-B016	Basalt	-42.76	90.51	0	N/A	N/A										17.8785	15.4635	37.5556											17.8785	15.4635
768	[116]	Indian Ocean Spreading Ridges	Southeast Indian Ridge	DUF0171-WXC-B018	Basalt	-42.58	90.24	0	N/A	N/A										17.8969	15.4646	37.5682											17.8969	15.4646
769	[116]	Indian Ocean Spreading Ridges	Southeast Indian Ridge	DUF0171-WXC-B019	Basalt	-42.48	89.97	0	N/A	N/A										17.9199	15.4685	37.6191											17.9199	15.4685
770	[116]	Indian Ocean Spreading Ridges	Southeast Indian Ridge	DUF0171-WXC-B020	Basalt	-42.42	89.88	0	N/A	N/A										17.9423	15.4713	37.7055											17.9423	15.4713
771	[116]	Indian Ocean Spreading Ridges	Southeast Indian Ridge	DUF0171-WXC-B021	Basalt	-42.36	89.8	0	N/A	N/A										17.9443	15.4723	37.7076											17.9443	15.4723
772	[116]	Indian Ocean Spreading Ridges	Southeast Indian Ridge	DUF0171-WXC-B022	Basalt	-44.02	93.55	0	N/A	N/A										17.7982	15.4584	37.3963											17.7982	15.4584
773	[116]	Indian Ocean Spreading Ridges	Southeast Indian Ridge	DUF0171-WXC-B023	Basalt	-43.98	93.46	0	N/A	N/A										17.856	15.4662	37.462											17.856	15.4662
774	[116]	Indian Ocean Spreading Ridges	Southeast Indian Ridge	DUF0171-WXC-B024	Basalt	-43.92	93.36	0	N/A	N/A										17.7708	15.4503	37.3351											17.7708	15.4503
775	[116]	Indian Ocean Spreading Ridges	Southeast Indian Ridge	DUF0171-WXC-B025	Basalt	-43.9	93.23	0	N/A	N/A										17.8634	15.4772	37.5731											17.8634	15.4772
776	[116]	Indian Ocean Spreading Ridges	Southeast Indian Ridge	DUF0171-WXC-B026	Basalt	-43.83	93.09	0	N/A	N/A										17.8554	15.4802	37.5567											17.8554	15.4802
777	[116]	Indian Ocean Spreading Ridges	Southeast Indian Ridge	DUF0171-WXC-B027	Basalt	-43.74	92.93	0	N/A	N/A										17.8789	15.4814	37.6216											17.8789	15.4814
778	[116]	Indian Ocean Spreading Ridges	Southeast Indian Ridge	DUF0171-WXC-B028	Basalt	-43.69	92.85	0	N/A	N/A										17.86	15.4806	37.5811											17.86	15.4806
779	[116]	Indian Ocean Spreading Ridges	Southeast Indian Ridge	DUF0171-WXC-B029	Basalt	-43.63	92.77	0	N/A	N/A										17.8674	15.4774	37.5737											17.8674	15.4774
780	[116]	Indian Ocean Spreading Ridges	Southeast Indian Ridge	DUF0171-WXC-B030	Basalt	-43.56	92.63	0	N/A	N/A										17.8691	15.4834	37.6052											17.8691	15.4834
781	[116]	Indian Ocean Spreading Ridges	Southeast Indian Ridge	DUF0171-WXC-B032	Basalt	-43.44	92.4	0	N/A	N/A										17.9028	15.4965	37.5883											17.9028	15.4965
782	[116]	Indian Ocean Spreading Ridges	Southeast Indian Ridge	DUF0171-WXC-B033	Basalt	-43.39	92.31	0	N/A	N/A										17.8379	15.4828	37.5148											17.8379	15.4828
783	[116]	Indian Ocean Spreading Ridges	Southeast Indian Ridge	DUF0171-WXC-B036	Basalt	-43.5	91.94	0	N/A	N/A										17.8685	15.4646	37.5611											17.8685	15.4646
784	[116]	Indian Ocean Spreading Ridges	Southeast Indian Ridge	DUF0171-WXC-B038	Basalt	-45.08	95.34	0	N/A	N/A										17.8725	15.4835	37.5442											17.8725	15.4835
785	[116]	Indian Ocean Spreading Ridges	Southeast Indian Ridge	DUF0171-WXC-B039	Basalt	-45.04	95.26	0	N/A	N/A										17.8609	15.4861	37.5371											17.8609	15.4861
786	[116]	Indian Ocean Spreading Ridges	Southeast Indian Ridge	DUF0171-WXC-B040	Basalt	-44.96	95.09	0	N/A	N/A										17.858	15.4774	37.5126											17.858	15.4774
787	[116]	Indian Ocean Spreading Ridges	Southeast Indian Ridge	DUF0171-WXC-B041	Basalt	-44.92	95.01	0	N/A	N/A										17.9117	15.4837	37.58											17.9117	15.4837
788	[116]	Indian Ocean Spreading Ridges	Southeast Indian Ridge	DUF0171-WXC-B042	Basalt	-44.89	94.92	0	N/A	N/A										17.8648	15.4772	37.5232											17.8648	15.4772
789	[116]	Indian Ocean Spreading Ridges	Southeast Indian Ridge	DUF0171-WXC-B043	Basalt	-44.8	94.77	0	N/A	N/A										17.8877	15.4877	37.634											17.8877	15.4877
790	[116]	Indian Ocean Spreading Ridges	Southeast Indian Ridge	DUF0171-WXC-B044	Basalt	-44.76	94.68	0	N/A	N/A										17.8744	15.4838	37.5225											17.8744	15.4838
791	[116]	Indian Ocean Spreading Ridges	Southeast Indian Ridge	DUF0171-WXC-B045	Basalt	-44.72	94.6	0	N/A	N/A										17.8721	15.4824	37.519											17.8721	15.4824
792	[116]	Indian Ocean Spreading Ridges	Southeast Indian Ridge	DUF0171-WXC-B047	Basalt	-44.57	94.34	0	N/A	N/A										17.8647	15.466	37.4748											17.8647	15.466
793	[116]	Indian Ocean Spreading Ridges	Southeast Indian Ridge	DUF0171-WXC-B049	Basalt	-44.41	94.31	0	N/A	N/A										17.8194	15.4653	37.4629											17.8194	15.4653
794	[116]	Indian Ocean Spreading Ridges	Southeast Indian Ridge	DUF0171-WXC-B051	Basalt	-44.22	94.03	0	N/A	N/A										17.8284	15.4619	37.4537											17.8284	15.4619
795	[116]	Indian Ocean Spreading Ridges	Southeast Indian Ridge	DUF0171-WXC-B052	Basalt	-44.22	93.99	0	N/A	N/A										17.8109	15.4634	37.4491											17.8109	15.4634
796	[116]	Indian Ocean Spreading Ridges	Southeast Indian Ridge	DUF0171-WXC-B054	Basalt	-45.2	96.11	0	N/A	N/A										17.8163	15.4705	37.5781											17.8163	15.4705
797	[116]	Indian Ocean Spreading Ridges	Southeast Indian Ridge	DUF0171-WXC-B055	Basalt	-45.16	96.03	0	N/A	N/A										17.8807	15.4751	37.6461											17.8807	15.4751
798	[116]	Indian Ocean Spreading Ridges	Southeast Indian Ridge	DUF0171-WXC-B53	Basalt	-45.3	96.31	0	N/A	N/A										17.7971	15.4708	37.5518											17.7971	15.4708
799	[116]	Indian Ocean Spreading Ridges	Southeast Indian Ridge	DUF0171-WXC-C001	Basalt	-48.16	99.26	0	N/A	N/A										17.8925	15.4755	37.6011											17.8925	15.4755
800	[116]	Indian Ocean Spreading Ridges	Southeast Indian Ridge	DUF0171-WXC-C002	Basalt	-48.04	99.12	0	N/A	N/A										17.9009	15.4783	37.5939											17.9009	15.4783
801	[116]	Indian Ocean Spreading Ridges	Southeast Indian Ridge	DUF0171-WXC-C003	Basalt	-48.06	98.93	0	N/A	N/A										17.898	15.4772	37.6139											17.898	15.4772
802	[116]	Indian Ocean Spreading Ridges	Southeast Indian Ridge	DUF0171-WXC-C004	Basalt	-48	98.82	0	N/A	N/A										17.9134	15.4789	37.651											17.9134	15.4789
803	[116]	Indian Ocean Spreading Ridges	Southeast Indian Ridge	DUF0171-WXC-C005	Basalt	-47.98	98.77	0	N/A	N/A										17.8968	15.4804	37.6867											17.8968	15.4804
804	[116]	Indian Ocean Spreading Ridges	Southeast Indian Ridge	DUF0171-WXC-C006	Basalt	-47.95	98.69	0	N/A	N/A										17.9378	15.479	37.6513											17.9378	15.479
805	[116]	Indian Ocean Spreading Ridges	Southeast Indian Ridge	DUF0171-WXC-C007	Basalt	-47.88	98.45	0	N/A	N/A										17.8748	15.4759	37.5745											17.8748	15.4759
806	[116]	Indian Ocean Spreading Ridges	Southeast Indian Ridge	DUF0171-WXC-C008	Basalt	-47.82	98.31	0	N/A	N/A										17.8979	15.4811	37.6367											17.8979	15.4811
807	[116]	Indian Ocean Spreading Ridges	Southeast Indian Ridge	DUF0171-WXC-C009	Basalt	-47.79	98.24	0	N/A	N/A										17.8993	15.4792	37.6243											17.8993	15.4792
808	[116]	Indian Ocean Spreading Ridges	Southeast Indian Ridge	DUF0171-WXC-C010	Basalt	-47.75	98.18	0	N/A	N/A										17.9403	15.4835	37.75											17.9403	15.4835
809	[116]	Indian Ocean Spreading Ridges	Southeast Indian Ridge	DUF0171-WXC-C011	Basalt	-47.73	98.09	0	N/A	N/A										17.9202	15.4809	37.6619											17.9202	15.4809
810	[116]	Indian Ocean Spreading Ridges	Southeast Indian Ridge	DUF0171-WXC-C012	Basalt	-47.7	98.03	0	N/A	N/A										17.917	15.488	37.7427											17.917	15.488
811	[116]	Indian Ocean Spreading Ridges	Southeast Indian Ridge	DUF0171-WXC-C013	Basalt	-47.68	97.98	0	N/A	N/A										17.9935	15.482	37.7085											17.9935	15.482
812	[116]	Indian Ocean Spreading Ridges	Southeast Indian Ridge	DUF0171-WXC-C014	Basalt	-47.63	97.94	0	N/A	N/A										17.9141	15.4783	37.6838											17.9141	15.4783
813	[116]	Indian Ocean Spreading Ridges	Southeast Indian Ridge	DUF0171-WXC-C015	Basalt	-47.62	97.86	0	N/A	N/A										17.928	15.4797	37.7114											17.928	15.4797
814	[116]	Indian Ocean Spreading Ridges	Southeast Indian Ridge	DUF0171-WXC-C016	Basalt	-47.59	97.8	0	N/A	N/A										18.0042	15.4753	37.6288											18.0042	15.4753
815	[116]	Indian Ocean Spreading Ridges	Southeast Indian Ridge	DUF0171-WXC-C017	Basalt	-47.57	97.74	0	N/A	N/A										17.9015	15.4624	37.5348											17.9015	15.4624
816	[116]	Indian Ocean Spreading Ridges	Southeast Indian Ridge	DUF0171-WXC-C018	Basalt	-47.53	97.68	0	N/A	N/A										18.0536	15.4804	37.7766											18.0536	15.4804
817	[116]	Indian Ocean Spreading Ridges	Southeast Indian Ridge	DUF0171-WXC-C019	Basalt	-47.51	97.61	0	N/A	N/A										17.923	15.4796	37.6938											17.923	15.4796
818	[116]	Indian Ocean Spreading Ridges	Southeast Indian Ridge	DUF0171-WXC-C020	Basalt	-47.48	97.55	0	N/A	N/A										17.9202	15.4806	37.6915											17.9202	15.4806
819	[116]	Indian Ocean Spreading Ridges	Southeast Indian Ridge	DUF0171-WXC-C021	Basalt	-47.41	97.44	0	N/A	N/A										17.908	15.478	37.7221											17.908	15.478
820	[116]	Indian Ocean Spreading Ridges	Southeast Indian Ridge	DUF0171-WXC-C022	Basalt	-47.38	97.38	0	N/A	N/A										17.918	15.4801	37.7157											17.918	15.4801
821	[116]	Indian Ocean Spreading Ridges	Southeast Indian Ridge	DUF0171-WXC-C023	Basalt	-47.36	97.32	0	N/A	N/A										17.9081	15.4807	37.7278											17.9081	15.4807
822	[116]	Indian Ocean Spreading Ridges	Southeast Indian Ridge	DUF0171-WXC-C024	Basalt	-47.31	97.26	0	N/A	N/A										17.9048	15.48	37.7054											17.9048	15.48
823	[116]	Indian Ocean Spreading Ridges	Southeast Indian Ridge	DUF0171-WXC-C025	Basalt	-47.27	97.23	0	N/A	N/A										17.889	15.4703	37.6584											17.889	15.4703
824	[116]	Indian Ocean Spreading Ridges	Southeast Indian Ridge	DUF0171-WXC-C026	Basalt	-47.24	97.16	0	N/A	N/A										17.9515	15.4798	37.7547											17.9515	15.4798
825	[116]	Indian Ocean Spreading Ridges	Southeast Indian Ridge	DUF0171-WXC-C027	Basalt	-47.21	97.09	0	N/A	N/A										17.7622	15.4709	37.6068											17.7622	15.4709
826	[116]	Indian Ocean Spreading Ridges	Southeast Indian Ridge	DUF0171-WXC-C028	Basalt	-47.19	97.01	0	N/A	N/A										17.8858	15.4777	37.7044											17.8858	15.4777
827	[116]	Indian Ocean Spreading Ridges	Southeast Indian Ridge	DUF0171-WXC-C029	Basalt	-47.16	96.95	0	N/A	N/A										17.8871	15.4784	37.7149											17.8871	15.4784
828	[116]	Indian Ocean Spreading Ridges	Southeast Indian Ridge	DUF0171-WXC-C030	Basalt	-47.12	96.89	0	N/A	N/A										17.8416	15.4775	37.6817											17.8416	15.4775
829	[116]	Indian Ocean Spreading Ridges	Southeast Indian Ridge	DUF0171-WXC-C031	Basalt	-47.05	96.76	0	N/A	N/A										17.8703	15.4707	37.7432											17.8703	15.4707
830	[116]	Indian Ocean Spreading Ridges	Southeast Indian Ridge	DUF0171-WXC-C032	Basalt	-47.02	96.71	0	N/A	N/A										17.8152	15.4723	37.6725											17.8152	15.4723
831	[116]	Indian Ocean Spreading Ridges	Southeast Indian Ridge	DUF0171-WXC-C033	Basalt	-46.92	96.63	0	N/A	N/A										17.7773	15.476	37.6161											17.7773	15.476
832	[116]	Indian Ocean Spreading Ridges	Southeast Indian Ridge	DUF0171-WXC-C034	Basalt	-46.9	96.57	0	N/A	N/A										17.7971	15.4755	37.5986											17.7971	15.4755
833	[116]	Indian Ocean Spreading Ridges	Southeast Indian Ridge	DUF0171-WXC-C035	Basalt	-46.87	96.51	0	N/A	N/A										17.7847	15.4768	37.6341											17.7847	15.4768
834	[116]	Indian Ocean Spreading Ridges	Southeast Indian Ridge	DUF0171-WXC-C036	Basalt	-46.83	96.45	0	N/A	N/A										17.8007	15.4747	37.641											17.8007	15.4747
835	[116]	Indian Ocean Spreading Ridges	Southeast Indian Ridge	DUF0171-WXC-C037	Basalt	-46.8	96.39	0	N/A	N/A										17.7303	15.4727	37.5923											17.7303	15.4727
836	[116]	Indian Ocean Spreading Ridges	Southeast Indian Ridge	DUF0171-WXC-C038	Basalt	-46.75	96.3	0	N/A	N/A										17.7448	15.4779	37.6538											17.7448	15.4779
837	[116]	Indian Ocean Spreading Ridges	Southeast Indian Ridge	DUF0171-WXC-C039	Basalt	-46.71	96.24	0	N/A	N/A										17.7254	15.4804	37.6508											17.7254	15.4804
838	[116]	Indian Ocean Spreading Ridges	Southeast Indian Ridge	DUF0171-WXC-C040	Basalt	-46.69	96.18	0	N/A	N/A										17.7344	15.483	37.6739											17.7344	15.483
839	[116]	Indian Ocean Spreading Ridges	Southeast Indian Ridge	DUF0171-WXC-C042	Basalt	-46.66	96.12	0	N/A	N/A										18.123	15.4969	37.9258											18.123	15.4969
840	[116]	Indian Ocean Spreading Ridges	Southeast Indian Ridge	DUF0171-WXC-C043	Basalt	-46.62	96.06	0	N/A	N/A										17.7245	15.4775	37.6277											17.7245	15.4775
841	[116]	Indian Ocean Spreading Ridges	Southeast Indian Ridge	DUF0171-WXC-C044	Basalt	-46.6	95.99	0	N/A	N/A										17.7171	15.4779	37.6536											17.7171	15.4779
842	[116]	Indian Ocean Spreading Ridges	Southeast Indian Ridge	DUF0171-WXC-C045	Basalt	-46.26	96.19	0	N/A	N/A										17.843	15.4652	37.5114											17.843	15.4652
843	[116]	Indian Ocean Spreading Ridges	Southeast Indian Ridge	DUF0171-WXC-C046	Basalt	-46.21	96.11	0	N/A	N/A										17.8554	15.4675	37.5352											17.8554	15.4675
844	[116]	Indian Ocean Spreading Ridges	Southeast Indian Ridge	DUF0171-WXC-C047	Basalt	-46.16	96	0	N/A	N/A										17.8451	15.4659	37.4898											17.8451	15.4659
845	[116]	Indian Ocean Spreading Ridges	Southeast Indian Ridge	DUF0171-WXC-C048	Basalt	-46.05	95.83	0	N/A	N/A										17.8852	15.4708	37.5909											17.8852	15.4708
846	[116]	Indian Ocean Spreading Ridges	Southeast Indian Ridge	DUF0171-WXC-C049	Basalt	-46.02	95.77	0	N/A	N/A										17.8451	15.4655	37.5186											17.8451	15.4655
847	[117]	Indian Ocean Spreading Ridges	Southeast Indian Ridge	MELBMRG-5-024-004	Basalt	-48.03	127.48	0	N/A	N/A										18.539	15.476	38.078											18.539	15.476
848	[117]	Indian Ocean Spreading Ridges	Southeast Indian Ridge	MELBMRG-5-030-004	Basalt	-48.41	125.677	0	N/A	N/A										17.479	15.387	37.28											17.479	15.387
849	[117]	Indian Ocean Spreading Ridges	Southeast Indian Ridge	MELBMRG-5-BB3	Basalt	-49.09	124.902	0	N/A	N/A										17.867	15.46	37.648											17.867	15.46
856	[139]	Indian Ocean Spreading Ridges	Southeast Indian Ridge	MELBMRG-6-033-002	Basalt	-42.115	88.042	0	N/A	N/A								0.512889	0.70364	17.97	15.501	37.979											17.97	15.501	0.70364	0.512889
857	[139]	Indian Ocean Spreading Ridges	Southeast Indian Ridge	MELBMRG-6-034-001	Basalt	-41.517	87.092	0	N/A	N/A	4.42	12.1						0.512904	0.70358	17.812	15.497	37.886	0.220853	0.512904									17.812	15.497	0.70358	0.512904
858	[139]	Indian Ocean Spreading Ridges	Southeast Indian Ridge	MELBMRG-6-036-001	Basalt	-41.098	86.23	0	N/A	N/A	4.34	12						0.512943	0.70348	17.735	15.487	37.76	0.218665	0.512943									17.735	15.487	0.70348	0.512943
859	[139]	Indian Ocean Spreading Ridges	Southeast Indian Ridge	MELWEST-10-048WC	Basalt	-46.09	95.93	0	N/A	N/A	3.73	14.7						0.512963	0.70309	18.494	15.519	38.25	0.153414	0.512963									18.494	15.519	0.70309	0.512963
860	[139]	Indian Ocean Spreading Ridges	Southeast Indian Ridge	MELWEST-10-065-009	Basalt	-43.0822	91.0947	0	N/A	N/A	3.74	10.9						0.513038	0.70302	17.868	15.48	37.564	0.207456	0.513038									17.868	15.48	0.70302	0.513038
861	[139]	Indian Ocean Spreading Ridges	Southeast Indian Ridge	MELWEST-10-069-001	Basalt	-41.87	88.9222	0	N/A	N/A	1.79	4.77						0.512954	0.70331	18.03	15.473	37.892	0.226885	0.512954									18.03	15.473	0.70331	0.512954
862	[139]	Indian Ocean Spreading Ridges	Southeast Indian Ridge	MELWEST-10-070-032	Basalt	-42.568	90.204	0	N/A	N/A	3.58	10.6						0.513021	0.70302	17.91	15.474	37.646	0.2042	0.513021									17.91	15.474	0.70302	0.513021
863	[139]	Indian Ocean Spreading Ridges	Southeast Indian Ridge	MELWEST-10-071-001	Basalt	-42.8863	90.7952	0	N/A	N/A	3.3	9.45						0.51304	0.70293	17.863	15.479	37.456	0.211136	0.51304									17.863	15.479	0.70293	0.51304
864	[139]	Indian Ocean Spreading Ridges	Southeast Indian Ridge	MELWEST-10-072-002	Basalt	-43.4172	91.2892	0	N/A	N/A	2.37	6.6						0.513029	0.70298	17.97	15.464	37.661	0.217112	0.513029									17.97	15.464	0.70298	0.513029
865	[139]	Indian Ocean Spreading Ridges	Southeast Indian Ridge	MELWEST-10-073-008	Basalt	-43.4683	91.684	0	N/A	N/A	4.27	12.11						0.513032	0.70302	17.868	15.485	37.569	0.213188	0.513032									17.868	15.485	0.70302	0.513032
866	[139]	Indian Ocean Spreading Ridges	Southeast Indian Ridge	MELWEST-10-074-002	Basalt	-43.4282	92.3333	0	N/A	N/A	3.76	11.8						0.513016	0.70314	17.848	15.464	37.549	0.192656	0.513016									17.848	15.464	0.70314	0.513016
867	[139]	Indian Ocean Spreading Ridges	Southeast Indian Ridge	MELWEST-10-075-004	Basalt	-43.5785	92.677	0	N/A	N/A	3.31	10.07						0.512995	0.70324	17.844	15.478	37.547	0.198735	0.512995									17.844	15.478	0.70324	0.512995
868	[139]	Indian Ocean Spreading Ridges	Southeast Indian Ridge	MELWEST-10-076-001	Basalt	-43.8823	93.1143	0	N/A	N/A	3.55	11.16						0.512961	0.70332	17.874	15.484	37.586	0.192325	0.512961									17.874	15.484	0.70332	0.512961
869	[139]	Indian Ocean Spreading Ridges	Southeast Indian Ridge	MELWEST-10-077-007	Basalt	-44.1167	93.773	0	N/A	N/A	4.36	12.68						0.51306	0.70292	17.793	15.465	37.443	0.207898	0.51306									17.793	15.465	0.70292	0.51306
870	[139]	Indian Ocean Spreading Ridges	Southeast Indian Ridge	MELWEST-10-078-002	Basalt	-44.833	94.8328	0	N/A	N/A	2.85	8.38						0.513012	0.70312	17.871	15.489	37.537	0.205626	0.513012									17.871	15.489	0.70312	0.513012
871	[139]	Indian Ocean Spreading Ridges	Southeast Indian Ridge	MELWEST-10-079-017	Basalt	-45.106	95.4088	0	N/A	N/A	4	11.5						0.513018	0.70304	17.875	15.477	37.523	0.2103	0.513018									17.875	15.477	0.70304	0.513018
872	[139]	Indian Ocean Spreading Ridges	Southeast Indian Ridge	MELWEST-10-081-001	Basalt	-45.1743	95.59	0	N/A	N/A	3	8.83						0.513011	0.70305	17.883	15.479	37.546	0.205418	0.513011									17.883	15.479	0.70305	0.513011
873	[139]	Indian Ocean Spreading Ridges	Southeast Indian Ridge	MELWEST-10-082-035	Basalt	-45.1845	95.6983	0	N/A	N/A	3.12	9.24						0.513018	0.70311	17.926	15.479	37.55	0.204155	0.513018									17.926	15.479	0.70311	0.513018
874	[139]	Indian Ocean Spreading Ridges	Southeast Indian Ridge	MELWEST-10-083-017	Basalt	-45.0512	95.764	0	N/A	N/A	2.74	9.49						0.512986	0.7032	18.133	15.504	37.92	0.174566	0.512986									18.133	15.504	0.7032	0.512986
875	[139]	Indian Ocean Spreading Ridges	Southeast Indian Ridge	MELWEST-10-084-007	Basalt	-45.1105	95.9322	0	N/A	N/A	3.26	9.69						0.513036	0.70308	17.754	15.463	37.498	0.203411	0.513036									17.754	15.463	0.70308	0.513036
876	[139]	Indian Ocean Spreading Ridges	Southeast Indian Ridge	MELWEST-10-087-038	Basalt	-46.7782	96.3675	0	N/A	N/A	2.99	8.31						0.512981	0.70323	17.731	15.47	37.596	0.217543	0.512981									17.731	15.47	0.70323	0.512981
877	[139]	Indian Ocean Spreading Ridges	Southeast Indian Ridge	MELWEST-10-088-001	Basalt	-47.076	96.8325	0	N/A	N/A	2.41	6.53						0.513015	0.70314	17.841	15.481	37.786	0.223142	0.513015									17.841	15.481	0.70314	0.513015
878	[139]	Indian Ocean Spreading Ridges	Southeast Indian Ridge	MELWEST-10-089-004	Basalt	-47.4463	97.512	0	N/A	N/A	3.84	13.02						0.512911	0.70361	17.937	15.499	37.801	0.178315	0.512911									17.937	15.499	0.70361	0.512911
879	[139]	Indian Ocean Spreading Ridges	Southeast Indian Ridge	MELWEST-10-089-107	Basalt	-47.4463	97.512	0	N/A	N/A	3.51	11.4						0.512952	0.70339	17.859	15.492	37.743	0.186154	0.512952									17.859	15.492	0.70339	0.512952
880	[139]	Indian Ocean Spreading Ridges	Southeast Indian Ridge	MELWEST-10-090-001	Basalt	-47.7107	98.1568	0	N/A	N/A	3.32	9.82						0.51296	0.70308	17.843	15.483	37.614	0.204408	0.51296									17.843	15.483	0.70308	0.51296
881	[139]	Indian Ocean Spreading Ridges	Southeast Indian Ridge	MELWEST-10-091-003	Basalt	-47.9095	98.6012	0	N/A	N/A	5.81	17.6						0.512986	0.70315	17.914	15.483	37.682	0.19959	0.512986									17.914	15.483	0.70315	0.512986
882	[139]	Indian Ocean Spreading Ridges	Southeast Indian Ridge	MELWEST-10-092-001	Basalt	-48.1005	98.9432	0	N/A	N/A	2.9	8.47						0.513019	0.70317	17.891	15.486	37.578	0.207011	0.513019									17.891	15.486	0.70317	0.513019
883	[139]	Indian Ocean Spreading Ridges	Southeast Indian Ridge	MELWEST-10-096-001	Basalt	-47.335	100.672	0	N/A	N/A	3.81	12.2						0.513001	0.70301	18.133	15.483	37.923	0.188817	0.513001									18.133	15.483	0.70301	0.513001
884	[139]	Indian Ocean Spreading Ridges	Southeast Indian Ridge	MELWEST-10-097-008	Basalt	-47.1865	100.863	0	N/A	N/A	2.75	8.92						0.513018	0.70284	18.088	15.466	37.874	0.1864	0.513018									18.088	15.466	0.70284	0.513018
885	[139]	Indian Ocean Spreading Ridges	Southeast Indian Ridge	MELWEST-10-098-003	Basalt	-47.4583	100.961	0	N/A	N/A	2.98	9.89						0.512988	0.70301	18.257	15.512	38.102	0.182177	0.512988									18.257	15.512	0.70301	0.512988
886	[139]	Indian Ocean Spreading Ridges	Southeast Indian Ridge	MELWEST-10-099-015	Basalt	-47.59	101.223	0	N/A	N/A	3.3	10.04						0.51302	0.70293	17.996	15.467	37.764	0.198728	0.51302									17.996	15.467	0.70293	0.51302
887	[139]	Indian Ocean Spreading Ridges	Southeast Indian Ridge	MELWEST-10-100-001	Basalt	-47.6313	101.532	0	N/A	N/A	3.64	12.08						0.512978	0.70306	18.105	15.485	37.944	0.182183	0.512978									18.105	15.485	0.70306	0.512978
888	[139]	Indian Ocean Spreading Ridges	Southeast Indian Ridge	MELWEST-10-102-001	Basalt	-47.8763	102.139	0	N/A	N/A	2.85	8.34						0.513021	0.70293	17.989	15.475	37.77	0.206613	0.513021									17.989	15.475	0.70293	0.513021
889	[139]	Indian Ocean Spreading Ridges	Southeast Indian Ridge	MELWEST-10-103-004	Basalt	-48.0187	102.54	0	N/A	N/A	2.36	6.81						0.513039	0.70291	17.951	15.465	37.719	0.209529	0.513039									17.951	15.465	0.70291	0.513039
890	[139]	Indian Ocean Spreading Ridges	Southeast Indian Ridge	MELWEST-10-105-001	Basalt	-47.765	103.038	0	N/A	N/A	3.32	10.61						0.513047	0.7029	17.987	15.48	37.802	0.189192	0.513047									17.987	15.48	0.7029	0.513047
891	[139]	Indian Ocean Spreading Ridges	Southeast Indian Ridge	MELWEST-10-106-004	Basalt	-47.878	103.353	0	N/A	N/A	2.38	7.31						0.513015	0.7029	18.114	15.477	37.922	0.196851	0.513015									18.114	15.477	0.7029	0.513015
892	[139]	Indian Ocean Spreading Ridges	Southeast Indian Ridge	MELWEST-10-108-003	Basalt	-47.972	103.571	0	N/A	N/A	2.66	7.85						0.513024	0.70293	18.103	15.482	37.936	0.204876	0.513024									18.103	15.482	0.70293	0.513024
893	[139]	Indian Ocean Spreading Ridges	Southeast Indian Ridge	MELWEST-10-110-004	Basalt	-48.1037	103.931	0	N/A	N/A	2.65	7.52						0.513028	0.70286	18.062	15.466	37.844	0.213062	0.513028									18.062	15.466	0.70286	0.513028
894	[139]	Indian Ocean Spreading Ridges	Southeast Indian Ridge	MELWEST-10-111-018	Basalt	-48.2133	104.662	0	N/A	N/A	3.88	13.79						0.512934	0.70312	18.322	15.506	38.217	0.170113	0.512934									18.322	15.506	0.70312	0.512934
895	[139]	Indian Ocean Spreading Ridges	Southeast Indian Ridge	MELWEST-10-112-001	Basalt	-48.3172	104.966	0	N/A	N/A	2.91	8.94						0.512985	0.70304	18.14	15.494	37.99	0.196802	0.512985									18.14	15.494	0.70304	0.512985
896	[139]	Indian Ocean Spreading Ridges	Southeast Indian Ridge	MELWEST-10-113-007	Basalt	-48.7517	105.224	0	N/A	N/A	3.27	9.95						0.513052	0.70274	18.144	15.467	37.936	0.198704	0.513052									18.144	15.467	0.70274	0.513052
897	[139]	Indian Ocean Spreading Ridges	Southeast Indian Ridge	MELWEST-10-114-012	Basalt	-49.1163	105.588	0	N/A	N/A	3.72	14.4						0.512857	0.70351	18.351	15.536	38.268	0.156186	0.512857									18.351	15.536	0.70351	0.512857
898	[139]	Indian Ocean Spreading Ridges	Southeast Indian Ridge	MELWEST-10-115-003	Basalt	-49.2287	105.868	0	N/A	N/A	3.33	9.92						0.512992	0.70311	18.06	15.495	38.005	0.202959	0.512992									18.06	15.495	0.70311	0.512992
899	[139]	Indian Ocean Spreading Ridges	Southeast Indian Ridge	MELWEST-10-116-002	Basalt	-48.8733	106.494	0	N/A	N/A	3.79	12.5						0.513007	0.70294	18.233	15.487	38.175	0.183318	0.513007									18.233	15.487	0.70294	0.513007
900	[139]	Indian Ocean Spreading Ridges	Southeast Indian Ridge	MELWEST-10-116-015	Basalt	-48.8733	106.494	0	N/A	N/A	3.84	12.61						0.513008	0.7029	18.251	15.5	38.223	0.184117	0.513008									18.251	15.5	0.7029	0.513008
901	[139]	Indian Ocean Spreading Ridges	Southeast Indian Ridge	MELWEST-10-117-001	Basalt	-48.3497	107.145	0	N/A	N/A	4.4	14.49						0.513011	0.70289	18.284	15.508	38.249	0.183595	0.513011									18.284	15.508	0.70289	0.513011
902	[139]	Indian Ocean Spreading Ridges	Southeast Indian Ridge	MELWEST-10-118-001	Basalt	-48.4288	107.527	0	N/A	N/A	5.18	17.94						0.512973	0.70301	18.365	15.503	38.353	0.174574	0.512973									18.365	15.503	0.70301	0.512973
903	[139]	Indian Ocean Spreading Ridges	Southeast Indian Ridge	MELWEST-10-122-001	Basalt	-48.7383	108.277	0	N/A	N/A	4.6	14.9						0.512972	0.70298	18.282	15.491	38.273	0.186657	0.512972									18.282	15.491	0.70298	0.512972
904	[139]	Indian Ocean Spreading Ridges	Southeast Indian Ridge	MELWEST-10-124-001	Basalt	-49.0252	108.514	0	N/A	N/A	2.33	6.38						0.513041	0.70273	18.011	15.459	37.845	0.220808	0.513041									18.011	15.459	0.70273	0.513041
905	[139]	Indian Ocean Spreading Ridges	Southeast Indian Ridge	MELWEST-10-125-001	Basalt	-49.45	109.105	0	N/A	N/A	2.64	7.96						0.513023	0.70285	18.128	15.475	38.047	0.200525	0.513023									18.128	15.475	0.70285	0.513023
906	[139]	Indian Ocean Spreading Ridges	Southeast Indian Ridge	MELWEST-10-126-007	Basalt	-49.527	109.484	0	N/A	N/A	3.48	12.77						0.512909	0.70336	18.198	15.512	38.262	0.164761	0.512909									18.198	15.512	0.70336	0.512909
907	[139]	Indian Ocean Spreading Ridges	Southeast Indian Ridge	MELWEST-10-128-001	Basalt	-49.8275	110.412	0	N/A	N/A	2.62	8.33						0.512917	0.70343	18.132	15.533	38.193	0.190162	0.512917									18.132	15.533	0.70343	0.512917
908	[139]	Indian Ocean Spreading Ridges	Southeast Indian Ridge	MELWEST-10-128-018	Basalt	-49.8275	110.412	0	N/A	N/A	1.95	5.51						0.513141	0.70273	17.734	15.449	37.631	0.21398	0.513141									17.734	15.449	0.70273	0.513141
909	[139]	Indian Ocean Spreading Ridges	Southeast Indian Ridge	MELWEST-10-130-001	Basalt	-49.7813	111.135	0	N/A	N/A	2.95	8.77						0.513057	0.70274	18.064	15.468	37.964	0.203378	0.513057									18.064	15.468	0.70274	0.513057
910	[139]	Indian Ocean Spreading Ridges	Southeast Indian Ridge	MELWEST-10-132-001	Basalt	-50.2115	111.783	0	N/A	N/A	3.29	10.72						0.513036	0.70287	17.972	15.478	37.829	0.185558	0.513036									17.972	15.478	0.70287	0.513036
911	[139]	Indian Ocean Spreading Ridges	Southeast Indian Ridge	MELWEST-10-133-001	Basalt	-50.3163	112.316	0	N/A	N/A	3.08	9.26						0.513071	0.70271	17.813	15.443	37.594	0.201105	0.513071									17.813	15.443	0.70271	0.513071
912	[139]	Indian Ocean Spreading Ridges	Southeast Indian Ridge	MELWEST-10-134-001	Basalt	-50.296	112.49	0	N/A	N/A	3.13	9.16						0.51304	0.70285	17.964	15.454	37.819	0.206599	0.51304									17.964	15.454	0.70285	0.51304
913	[139]	Indian Ocean Spreading Ridges	Southeast Indian Ridge	MELWEST-10-135-008	Basalt	-50.3073	112.595	0	N/A	N/A	3.73	10.92						0.513055	0.70281	17.931	15.455	37.785	0.206523	0.513055									17.931	15.455	0.70281	0.513055
914	[139]	Indian Ocean Spreading Ridges	Southeast Indian Ridge	MELWEST-10-136-015	Basalt	-50.3231	112.686	0	N/A	N/A	3.4	9.94						0.513044	0.70283	17.95	15.466	37.821	0.206811	0.513044									17.95	15.466	0.70283	0.513044
915	[139]	Indian Ocean Spreading Ridges	Southeast Indian Ridge	MELWEST-10-138-001	Basalt	-50.1879	112.857	0	N/A	N/A	5.24	15.98						0.513035	0.70289	17.968	15.443	37.722	0.19826	0.513035									17.968	15.443	0.70289	0.513035
916	[139]	Indian Ocean Spreading Ridges	Southeast Indian Ridge	MELWEST-10-138-036	Basalt	-50.1879	112.857	0	N/A	N/A	3.01	9.26						0.513012	0.70298	17.952	15.466	37.791	0.196532	0.513012									17.952	15.466	0.70298	0.513012
917	[139]	Indian Ocean Spreading Ridges	Southeast Indian Ridge	MELWEST-10-140-005	Basalt	-50.3007	113.454	0	N/A	N/A	4.13	13.05						0.513018	0.70292	18.017	15.45	37.81	0.191345	0.513018									18.017	15.45	0.70292	0.513018
918	[139]	Indian Ocean Spreading Ridges	Southeast Indian Ridge	MELWEST-10-141-001	Basalt	-50.3475	113.616	0	N/A	N/A	4.05	12.71						0.512999	0.70297	17.947	15.461	37.796	0.192657	0.512999									17.947	15.461	0.70297	0.512999
919	[139]	Indian Ocean Spreading Ridges	Southeast Indian Ridge	MELWEST-10-142-001	Basalt	-49.8604	114.481	0	N/A	N/A	3.41	10.27						0.513015	0.70308	17.935	15.479	37.938	0.200753	0.513015									17.935	15.479	0.70308	0.513015
920	[139]	Indian Ocean Spreading Ridges	Southeast Indian Ridge	MELWEST-10-144-004	Basalt	-50.0078	115.212	0	N/A	N/A	2.96	8.91						0.513011	0.70315	17.894	15.459	37.887	0.200859	0.513011									17.894	15.459	0.70315	0.513011
921	[139]	Indian Ocean Spreading Ridges	Southeast Indian Ridge	MELWEST-10-145-001	Basalt	-49.2749	116.718	0	N/A	N/A	3.19	10.63						0.512929	0.70369	17.594	15.473	37.612	0.181437	0.512929									17.594	15.473	0.70369	0.512929
922	[139]	Indian Ocean Spreading Ridges	Southeast Indian Ridge	MELWEST-10-145-007	Basalt	-49.2749	116.718	0	N/A	N/A	2.91	9.49						0.513075	0.70311	17.362	15.443	37.32	0.1854	0.513075									17.362	15.443	0.70311	0.513075
923	[139]	Indian Ocean Spreading Ridges	Southeast Indian Ridge	MELWEST-10-146-001	Basalt	-49.5055	117.182	0	N/A	N/A	2.97	9.31						0.512991	0.70318	17.974	15.513	38.027	0.192878	0.512991									17.974	15.513	0.70318	0.512991
924	[139]	Indian Ocean Spreading Ridges	Southeast Indian Ridge	MELWEST-10-147-006	Basalt	-49.7047	117.517	0	N/A	N/A	5.31	16.57						0.513018	0.70295	18.011	15.47	37.847	0.193754	0.513018									18.011	15.47	0.70295	0.513018
925	[158][117][111]	Indian Ocean Spreading Ridges	Southeast Indian Ridge	MOA8801-001-015	Basalt	-50.21	128.54	0	N/A	N/A	5.737	16.492								18.699	15.5	38.21											18.699	15.5
926	[158][117]	Indian Ocean Spreading Ridges	Southeast Indian Ridge	MOA8801-002-001	Basalt	-50.312	129.533	0	N/A	N/A	4.52	13.2								18.594	15.484	38.121											18.594	15.484
927	[158][117][111]	Indian Ocean Spreading Ridges	Southeast Indian Ridge	MOA8801-003-006	Basalt	-50.107	127.962	0	N/A	N/A	7.081	20.8								18.687	15.505	38.207											18.687	15.505
928	[159][158][117][111]	Indian Ocean Spreading Ridges	Southeast Indian Ridge	MOA8801-004-002	Basalt	-48.763	127.36	0	N/A	N/A	2.964	9.88						0.513092	0.70248	18.608	15.458	38.073	0.181387	0.513092									18.608	15.458	0.70248	0.513092
929	[159][158][117][111]	Indian Ocean Spreading Ridges	Southeast Indian Ridge	MOA8801-005-001	Basalt	-48.68	126.52	0	N/A	N/A	3.403	9.617						0.513038	0.70284	18.238	15.48	37.998	0.213945	0.513038									18.238	15.48	0.70284	0.513038
930	[159][158][117][111]	Indian Ocean Spreading Ridges	Southeast Indian Ridge	MOA8801-006-002	Basalt	-48.765	126.883	0	N/A	N/A	3.346	9.799						0.51305	0.70268	18.4	15.485	38.056	0.206455	0.51305									18.4	15.485	0.70268	0.51305
931	[158][117]	Indian Ocean Spreading Ridges	Southeast Indian Ridge	MOA8801-009-041	Basalt	-50.198	127.063	0	N/A	N/A	4.73	15.1								18.583	15.479	38.101											18.583	15.479
932	[158][117][111]	Indian Ocean Spreading Ridges	Southeast Indian Ridge	MOA8801-010-001	Basalt	-50.243	127.59	0	N/A	N/A	6.321	19.638								18.657	15.488	38.169											18.657	15.488
933	[158][117][111]	Indian Ocean Spreading Ridges	Southeast Indian Ridge	MOA8801-011-017	Basalt	-50.152	127.652	0	N/A	N/A	4.407	14.122								18.711	15.49	38.207											18.711	15.49
934	[158][117][111]	Indian Ocean Spreading Ridges	Southeast Indian Ridge	MOA8801-012-001	Basalt	-50.162	127.833	0	N/A	N/A	7.872	23.8								18.685	15.489	38.17											18.685	15.489
935	[159][158][111]	Indian Ocean Spreading Ridges	Southeast Indian Ridge	MOA8801-013-047	Basalt	-50.147	128.015	0	N/A	N/A	5.89	17.203						0.513076	0.70258	18.656	15.485	38.136	0.207012	0.513076									18.656	15.485	0.70258	0.513076
936	[158][117]	Indian Ocean Spreading Ridges	Southeast Indian Ridge	MOA8801-013-051	Basalt	-50.147	128.015	0	N/A	N/A	5.98	18.3								18.655	15.486	38.148											18.655	15.486
937	[159][158][117][111]	Indian Ocean Spreading Ridges	Southeast Indian Ridge	MOA8801-016-001	Basalt	-50.163	127.577	0	N/A	N/A	3.382	9.971						0.513088	0.70251	18.728	15.485	38.218	0.205078	0.513088									18.728	15.485	0.70251	0.513088
938	[159][158][117][111]	Indian Ocean Spreading Ridges	Southeast Indian Ridge	MOA8801-016-012	Basalt	-50.163	127.577	0	N/A	N/A	3.769	13.096						0.513064	0.70258	18.787	15.497	38.279	0.174008	0.513064									18.787	15.497	0.70258	0.513064
939	[159][160][158][117][111]	Indian Ocean Spreading Ridges	Southeast Indian Ridge	MOA8801-017-026	Basalt	-50.222	127.417	0	N/A	N/A	3.02	8.449						0.513054	0.70254	18.613	15.466	38.09	0.216114	0.513054									18.613	15.466	0.70254	0.513054
940	[129]	Indian Ocean Spreading Ridges	Southeast Indian Ridge	MOA8801-017-033	Basalt	-50.222	127.417	0	N/A	N/A								0.513075	0.702506																0.702506	0.513075
941	[158][117]	Indian Ocean Spreading Ridges	Southeast Indian Ridge	MOA8801-019-056	Basalt	-50.147	127.017	0	N/A	N/A	5.96	19.2								18.689	15.488	38.187											18.689	15.488
942	[159][158][163][117][111]	Indian Ocean Spreading Ridges	Southeast Indian Ridge	MOA8801-022-013	Basalt	-49.68	125.892	0	N/A	N/A	2.417	7.317						0.513261	0.70281	17.763	15.428	37.591	0.199731	0.513261									17.763	15.428	0.70281	0.513261
943	[159][160][158][117][111]	Indian Ocean Spreading Ridges	Southeast Indian Ridge	MOA8801-023-001	Basalt	-49.613	125.658	0	N/A	N/A	2.329	6.05						0.513234	0.70285	17.779	15.4	37.6	0.232763	0.513234									17.779	15.4	0.70285	0.513234
944	[159][160][158][117][111]	Indian Ocean Spreading Ridges	Southeast Indian Ridge	MOA8801-026-001	Basalt	-48.943	124.282	0	N/A	N/A	3.577	9.849						0.513048	0.70276	17.897	15.453	37.638	0.219588	0.513048									17.897	15.453	0.70276	0.513048
945	[158][117]	Indian Ocean Spreading Ridges	Southeast Indian Ridge	MOA8801-027-008	Basalt	-49.062	124.965	0	N/A	N/A										17.885	15.464	37.705											17.885	15.464
946	[129]	Indian Ocean Spreading Ridges	Southeast Indian Ridge	MOA8801-027-008	Basalt	-49.062	124.965	0	N/A	N/A								0.513035	0.70296																0.70296	0.513035
947	[159][158][117][111]	Indian Ocean Spreading Ridges	Southeast Indian Ridge	MOA8801-027-058	Basalt	-49.062	124.965	0	N/A	N/A	3.66	12.725						0.512903	0.70365	17.888	15.491	37.857	0.173896	0.512903									17.888	15.491	0.70365	0.512903
948	[159][160][158][117][111]	Indian Ocean Spreading Ridges	Southeast Indian Ridge	MOA8801-027-071	Basalt	-49.062	124.965	0	N/A	N/A	2.824	8.626							0.7029	17.843	15.459	37.626											17.843	15.459
949	[158][117]	Indian Ocean Spreading Ridges	Southeast Indian Ridge	MOA8801-028-001	Basalt	-48.99	124.708	0	N/A	N/A	3.45	9.6								17.788	15.462	37.547											17.788	15.462
950	[158][163][117][111]	Indian Ocean Spreading Ridges	Southeast Indian Ridge	MOA8801-029-005	Basalt	-48.907	124.468	0	N/A	N/A	3.085	9.676						0.512943		17.954	15.485	37.754	0.192766	0.512943									17.954	15.485
951	[129]	Indian Ocean Spreading Ridges	Southeast Indian Ridge	MOA8801-029-005	Basalt	-48.907	124.468	0	N/A	N/A								0.513041	0.702929																0.702929	0.513041
952	[159][158][117][111]	Indian Ocean Spreading Ridges	Southeast Indian Ridge	MOA8801-030-006	Basalt	-48.943	124.282	0	N/A	N/A	3.149	9.62						0.513012	0.70295	17.93	15.474	37.775	0.197913	0.513012									17.93	15.474	0.70295	0.513012
953	[129]	Indian Ocean Spreading Ridges	Southeast Indian Ridge	ODP0187-1152A-001R-001/021-025A	Basalt	-41.8979	127.007	0	N/A	N/A	5.92	18.3						0.512939	0.703651				0.195587	0.512939											0.703651	0.512939
954	[129]	Indian Ocean Spreading Ridges	Southeast Indian Ridge	ODP0187-1152A-001R-001/021-025S	Basalt	-41.8979	127.007	0	N/A	N/A	5.76	17.4						0.512951	0.703665				0.200145	0.512951											0.703665	0.512951
955	[125]	Indian Ocean Spreading Ridges	Southeast Indian Ridge	ODP0187-1152A-001R-001/025-029	Basalt	-41.8979	127.007	0	N/A	N/A	4.69	14.33						0.512978	0.703134	18.0625	15.4757	37.9914	0.197879	0.512978									18.0625	15.4757	0.703134	0.512978
956	[156]	Indian Ocean Spreading Ridges	Southeast Indian Ridge	ODP0187-1152A-001R-001/060-062	Basalt	-41.8979	127.007	0	N/A	N/A	4.92	15.23						0.512954	0.70312				0.195315	0.512954											0.70312	0.512954
957	[129]	Indian Ocean Spreading Ridges	Southeast Indian Ridge	ODP0187-1152A-001R-001/073-077	Basalt	-41.8979	127.007	0	N/A	N/A	5.56	16.8						0.512957	0.703585				0.200095	0.512957											0.703585	0.512957
958	[129]	Indian Ocean Spreading Ridges	Southeast Indian Ridge	ODP0187-1152B-003R-001/001-009	Basalt	-41.8972	127.008	0	N/A	N/A								0.512955	0.703066																0.703066	0.512955
959	[156]	Indian Ocean Spreading Ridges	Southeast Indian Ridge	ODP0187-1152B-003R-001/002-004	Basalt	-41.8972	127.008	0	N/A	N/A	3.75	11.41						0.512962	0.703105				0.198709	0.512962											0.703105	0.512962
960	[129]	Indian Ocean Spreading Ridges	Southeast Indian Ridge	ODP0187-1152B-004R-001/079-081	Basalt	-41.8972	127.008	0	N/A	N/A	4.3	13.1						0.51296	0.703692				0.198458	0.51296											0.703692	0.51296
961	[125]	Indian Ocean Spreading Ridges	Southeast Indian Ridge	ODP0187-1152B-004R-002/020-024	Basalt	-41.8972	127.008	0	N/A	N/A	3.54	10.9						0.512987	0.703067	18.0625	15.4757	37.9871	0.196359	0.512987									18.0625	15.4757	0.703067	0.512987
962	[156]	Indian Ocean Spreading Ridges	Southeast Indian Ridge	ODP0187-1152B-005R-001/068-074	Basalt	-41.8972	127.008	0	N/A	N/A	3.9	11.89						0.512955	0.703074				0.198314	0.512955											0.703074	0.512955
963	[156]	Indian Ocean Spreading Ridges	Southeast Indian Ridge	ODP0187-1152B-005R-001/142-143	Basalt	-41.8972	127.008	0	N/A	N/A	4.17	12.72						0.512953	0.703095				0.198208	0.512953											0.703095	0.512953
964	[156]	Indian Ocean Spreading Ridges	Southeast Indian Ridge	ODP0187-1153A-007W-004/060-065	Basalt	-41.2715	129.815	0	N/A	N/A	4.67	13.32						0.51306	0.702745				0.21198	0.51306											0.702745	0.51306
965	[125]	Indian Ocean Spreading Ridges	Southeast Indian Ridge	ODP0187-1153A-007W-004/065-069	Basalt	-41.2715	129.815	0	N/A	N/A	4.41	12.49						0.51308	0.702758	18.3053	15.4716	37.9344	0.213482	0.51308									18.3053	15.4716	0.702758	0.51308
966	[156]	Indian Ocean Spreading Ridges	Southeast Indian Ridge	ODP0187-1153A-008R-001/020-026	Basalt	-41.2715	129.815	0	N/A	N/A	4.37	12.62						0.513045	0.702742				0.209364	0.513045											0.702742	0.513045
967	[156]	Indian Ocean Spreading Ridges	Southeast Indian Ridge	ODP0187-1153A-008R-001/100-105	Basalt	-41.2715	129.815	0	N/A	N/A	4.15	11.99						0.513047	0.702717				0.209271	0.513047											0.702717	0.513047
968	[125]	Indian Ocean Spreading Ridges	Southeast Indian Ridge	ODP0187-1153A-008R-001/101-102	Basalt	-41.2715	129.815	0	N/A	N/A								0.513053	0.702734	18.422	15.4864	38.0487											18.422	15.4864	0.702734	0.513053
969	[125]	Indian Ocean Spreading Ridges	Southeast Indian Ridge	ODP0187-1153A-008R-001/134-137	Basalt	-41.2715	129.815	0	N/A	N/A	4.15	11.98						0.513073	0.702777	18.428	15.4884	38.056	0.209447	0.513073									18.428	15.4884	0.702777	0.513073
970	[125]	Indian Ocean Spreading Ridges	Southeast Indian Ridge	ODP0187-1154A-002R-001/025-027	Basalt	-41.4778	131.317	0	N/A	N/A	4.38	12.38						0.5131	0.702644	18.617	15.4954	38.1483	0.213914	0.5131									18.617	15.4954	0.702644	0.5131
971	[156]	Indian Ocean Spreading Ridges	Southeast Indian Ridge	ODP0187-1154A-002R-001/031-037	Basalt	-41.4778	131.317	0	N/A	N/A	4.83	13.83						0.513061	0.702699				0.211158	0.513061											0.702699	0.513061
972	[129]	Indian Ocean Spreading Ridges	Southeast Indian Ridge	ODP0187-1154A-002R-001/075-077	Basalt	-41.4778	131.317	0	N/A	N/A	4.62	13.1						0.513061	0.703051				0.213232	0.513061											0.703051	0.513061
973	[156]	Indian Ocean Spreading Ridges	Southeast Indian Ridge	ODP0187-1154A-003R-001/093-096	Basalt	-41.4778	131.317	0	N/A	N/A	4.93	14.12						0.513061	0.702572				0.211103	0.513061											0.702572	0.513061
974	[156]	Indian Ocean Spreading Ridges	Southeast Indian Ridge	ODP0187-1154A-003R-002/043-046	Basalt	-41.4778	131.317	0	N/A	N/A	4.93	14.14						0.513063	0.702605				0.210805	0.513063											0.702605	0.513063
975	[156]	Indian Ocean Spreading Ridges	Southeast Indian Ridge	ODP0187-1154A-004R-001/069-073	Basalt	-41.4778	131.317	0	N/A	N/A	4.87	13.94						0.513062	0.702652				0.211227	0.513062											0.702652	0.513062
976	[156]	Indian Ocean Spreading Ridges	Southeast Indian Ridge	ODP0187-1154A-004R-002/041-044	Basalt	-41.4778	131.317	0	N/A	N/A	4.85	13.89						0.513069	0.702601				0.211117	0.513069											0.702601	0.513069
977	[129]	Indian Ocean Spreading Ridges	Southeast Indian Ridge	ODP0187-1154A-005R-001/091-093	Basalt	-41.4778	131.317	0	N/A	N/A	4.31	12						0.51307	0.703183				0.21716	0.51307											0.703183	0.51307
978	[156]	Indian Ocean Spreading Ridges	Southeast Indian Ridge	ODP0187-1154A-006R-001/006-011	Basalt	-41.4778	131.317	0	N/A	N/A	4.91	14.08						0.513063	0.702699				0.210844	0.513063											0.702699	0.513063
979	[156]	Indian Ocean Spreading Ridges	Southeast Indian Ridge	ODP0187-1154A-007R-001/000-008	Basalt	-41.4778	131.317	0	N/A	N/A	4.79	13.72						0.513057	0.702601				0.211088	0.513057											0.702601	0.513057
980	[129]	Indian Ocean Spreading Ridges	Southeast Indian Ridge	ODP0187-1154A-008R-002/051-055	Basalt	-41.4778	131.317	0	N/A	N/A	5.05	14.4						0.513057	0.703298				0.212037	0.513057											0.703298	0.513057
981	[125]	Indian Ocean Spreading Ridges	Southeast Indian Ridge	ODP0187-1154A-009R-001/046-050	Basalt	-41.4778	131.317	0	N/A	N/A	4.5	12.2						0.513076	0.702629	18.5975	15.4878	38.1148	0.223016	0.513076									18.5975	15.4878	0.702629	0.513076
982	[125]	Indian Ocean Spreading Ridges	Southeast Indian Ridge	ODP0187-1155A-002R-001/029-032	Basalt	-41.9582	127.995	0	N/A	N/A	3.93	11.93						0.513031	0.702879	18.0937	15.4866	37.9063	0.199173	0.513031									18.0937	15.4866	0.702879	0.513031
983	[156]	Indian Ocean Spreading Ridges	Southeast Indian Ridge	ODP0187-1155A-005R-001/020-023	Basalt	-41.9582	127.995	0	N/A	N/A	4.38	13.59						0.513001	0.702987				0.194864	0.513001											0.702987	0.513001
984	[125]	Indian Ocean Spreading Ridges	Southeast Indian Ridge	ODP0187-1155A-007R-001/016-019	Basalt	-41.9582	127.995	0	N/A	N/A	2.59	7.82						0.513026	0.70299	17.9871	15.471	37.7631	0.20025	0.513026									17.9871	15.471	0.70299	0.513026
985	[156]	Indian Ocean Spreading Ridges	Southeast Indian Ridge	ODP0187-1155B-002R-001/055-057	Basalt	-41.9582	127.992	0	N/A	N/A	2.68	7.7						0.513031	0.702833				0.210438	0.513031											0.702833	0.513031
986	[156]	Indian Ocean Spreading Ridges	Southeast Indian Ridge	ODP0187-1155B-002R-001/066-068	Basalt	-41.9582	127.992	0	N/A	N/A	2.47	7.1						0.513021	0.702776				0.210338	0.513021											0.702776	0.513021
987	[156]	Indian Ocean Spreading Ridges	Southeast Indian Ridge	ODP0187-1155B-003R-001/038-043	Basalt	-41.9582	127.992	0	N/A	N/A	2.68	7.69						0.513032	0.702829				0.210711	0.513032											0.702829	0.513032
988	[125]	Indian Ocean Spreading Ridges	Southeast Indian Ridge	ODP0187-1155B-004R-001/076-080	Basalt	-41.9582	127.992	0	N/A	N/A	2.1	6.19						0.513049	0.702848	18.0056	15.4542	37.7568	0.205121	0.513049									18.0056	15.4542	0.702848	0.513049
989	[156]	Indian Ocean Spreading Ridges	Southeast Indian Ridge	ODP0187-1155B-005R-001/034-038	Basalt	-41.9582	127.992	0	N/A	N/A	2.64	7.58						0.513031	0.702801				0.210578	0.513031											0.702801	0.513031
990	[129][128]	Indian Ocean Spreading Ridges	Southeast Indian Ridge	ODP0187-1155B-005R-002/014-016	Basalt	-41.9582	127.992	0	N/A	N/A	2.22	6.34						0.513037	0.703197	18.015	15.452	37.749	0.211711	0.513037									18.015	15.452	0.703197	0.513037
991	[129][128]	Indian Ocean Spreading Ridges	Southeast Indian Ridge	ODP0187-1155B-006R-002/014-017	Basalt	-41.9582	127.992	0	N/A	N/A	2.5	7						0.513027	0.703521	18.186	15.471	37.765	0.215934	0.513027									18.186	15.471	0.703521	0.513027
992	[125]	Indian Ocean Spreading Ridges	Southeast Indian Ridge	ODP0187-1155B-006R-002/140-144	Basalt	-41.9582	127.992	0	N/A	N/A	2.41	6.75						0.513055	0.702854	18.0061	15.4606	37.7819	0.215871	0.513055									18.0061	15.4606	0.702854	0.513055
993	[125]	Indian Ocean Spreading Ridges	Southeast Indian Ridge	ODP0187-1155B-008R-002/005-009	Basalt	-41.9582	127.992	0	N/A	N/A	2.52	6.96						0.513048	0.702804	17.9968	15.455	37.7611	0.218913	0.513048									17.9968	15.455	0.702804	0.513048
994	[125]	Indian Ocean Spreading Ridges	Southeast Indian Ridge	ODP0187-1155B-008R-002/005-009	Basalt	-41.9582	127.992	0	N/A	N/A	2.41	6.33						0.513039	0.702877	17.9982	15.4542	37.7597	0.230194	0.513039									17.9982	15.4542	0.702877	0.513039
995	[156][128]	Indian Ocean Spreading Ridges	Southeast Indian Ridge	ODP0187-1155B-009R-002/019-022	Basalt	-41.9582	127.992	0	N/A	N/A	2.65	7.6						0.513024	0.702819	18.041	15.465	37.784	0.210819	0.513024									18.041	15.465	0.702819	0.513024
996	[129]	Indian Ocean Spreading Ridges	Southeast Indian Ridge	ODP0187-1155B-009R-002/019-022	Basalt	-41.9582	127.992	0	N/A	N/A								0.51304	0.702828																0.702828	0.51304
997	[129][128]	Indian Ocean Spreading Ridges	Southeast Indian Ridge	ODP0187-1155B-009R-002/025-029	Basalt	-41.9582	127.992	0	N/A	N/A	2.39	6.75						0.513037	0.703332	18.012	15.459	37.765	0.214079	0.513037									18.012	15.459	0.703332	0.513037
998	[129]	Indian Ocean Spreading Ridges	Southeast Indian Ridge	ODP0187-1156A-002R-002/076-080	Basalt	-42.7332	127.888	0	N/A	N/A	2.95	8.6						0.512991	0.703332				0.207395	0.512991											0.703332	0.512991
999	[125]	Indian Ocean Spreading Ridges	Southeast Indian Ridge	ODP0187-1156A-002R-003/018-024	Basalt	-42.7332	127.888	0	N/A	N/A	2.73	7.98						0.51301	0.702994	18.0288	15.4662	37.8457	0.206841	0.51301									18.0288	15.4662	0.702994	0.51301
1000	[156]	Indian Ocean Spreading Ridges	Southeast Indian Ridge	ODP0187-1156A-002R-003/133-136	Basalt	-42.7332	127.888	0	N/A	N/A	3.17	9.38						0.512985	0.702933				0.204329	0.512985											0.702933	0.512985
1001	[125]	Indian Ocean Spreading Ridges	Southeast Indian Ridge	ODP0187-1156A-002R-003/135-138	Basalt	-42.7332	127.888	0	N/A	N/A	2.79	7.8						0.513001	0.702921	18.0282	15.4649	37.8424	0.216265	0.513001									18.0282	15.4649	0.702921	0.513001
1002	[129]	Indian Ocean Spreading Ridges	Southeast Indian Ridge	ODP0187-1156A-003R-001/015-019	Basalt	-42.7332	127.888	0	N/A	N/A	3.29	9.81						0.512998	0.703529				0.20277	0.512998											0.703529	0.512998
1003	[156]	Indian Ocean Spreading Ridges	Southeast Indian Ridge	ODP0187-1156A-003R-001/102-104	Basalt	-42.7332	127.888	0	N/A	N/A	2.99	8.85						0.512991	0.702915				0.204269	0.512991											0.702915	0.512991
1004	[129]	Indian Ocean Spreading Ridges	Southeast Indian Ridge	ODP0187-1156A-003R-001/140-144	Basalt	-42.7332	127.888	0	N/A	N/A	2.82	8.26						0.513001	0.703233				0.206417	0.513001											0.703233	0.513001
1005	[125]	Indian Ocean Spreading Ridges	Southeast Indian Ridge	ODP0187-1156B-002R-001/072-082	Basalt	-42.7315	127.888	0	N/A	N/A								0.513011	0.703017	18.0148	15.4642	37.8494											18.0148	15.4642	0.703017	0.513011
1006	[156]	Indian Ocean Spreading Ridges	Southeast Indian Ridge	ODP0187-1156B-004R-001/102-106	Basalt	-42.7315	127.888	0	N/A	N/A	3.26	9.78						0.51298	0.703003				0.201536	0.51298											0.703003	0.51298
1007	[125]	Indian Ocean Spreading Ridges	Southeast Indian Ridge	ODP0187-1156B-005R-001/120-123	Basalt	-42.7315	127.888	0	N/A	N/A	2.6	7.8						0.512982	0.703007	18.011	15.4642	37.8429	0.201536	0.512982									18.011	15.4642	0.703007	0.512982
1008	[125]	Indian Ocean Spreading Ridges	Southeast Indian Ridge	ODP0187-1157A-001W-CC/012-016	Basalt	-43.2611	128.886	0	N/A	N/A	3.02	8.65						0.513021	0.702942	17.9848	15.4608	37.8079	0.211091	0.513021									17.9848	15.4608	0.702942	0.513021
1009	[156]	Indian Ocean Spreading Ridges	Southeast Indian Ridge	ODP0187-1157A-001W-CC/013-017	Basalt	-43.2611	128.886	0	N/A	N/A	3.18	9.43						0.513015	0.702894				0.203889	0.513015											0.702894	0.513015
1010	[129]	Indian Ocean Spreading Ridges	Southeast Indian Ridge	ODP0187-1157A-002R-001/025-027A	Basalt	-43.2611	128.886	0	N/A	N/A	9.68	28						0.513032	0.703599				0.209024	0.513032											0.703599	0.513032
1011	[129]	Indian Ocean Spreading Ridges	Southeast Indian Ridge	ODP0187-1157A-002R-001/025-027F	Basalt	-43.2611	128.886	0	N/A	N/A	4.35	12.6						0.513045	0.703145				0.208737	0.513045											0.703145	0.513045
1012	[125]	Indian Ocean Spreading Ridges	Southeast Indian Ridge	ODP0187-1157A-002R-001/086-090	Basalt	-43.2611	128.886	0	N/A	N/A	4.42	12.49						0.513066	0.702661	18.692	15.5054	38.242	0.213965	0.513066									18.692	15.5054	0.702661	0.513066
1013	[156]	Indian Ocean Spreading Ridges	Southeast Indian Ridge	ODP0187-1157A-003R-001/020-024	Basalt	-43.2611	128.886	0	N/A	N/A	4.58	13.32						0.513049	0.702613				0.207894	0.513049											0.702613	0.513049
1014	[156]	Indian Ocean Spreading Ridges	Southeast Indian Ridge	ODP0187-1157A-003R-001/025-029	Basalt	-43.2611	128.886	0	N/A	N/A	4.54	13.36						0.513048	0.70258				0.205461	0.513048											0.70258	0.513048
1015	[125]	Indian Ocean Spreading Ridges	Southeast Indian Ridge	ODP0187-1157A-003R-001/030-032	Basalt	-43.2611	128.886	0	N/A	N/A	4.35	12.05						0.513064	0.702729	18.6895	15.5027	38.2411	0.218265	0.513064									18.6895	15.5027	0.702729	0.513064
1016	[125]	Indian Ocean Spreading Ridges	Southeast Indian Ridge	ODP0187-1157A-003R-001/128-132	Basalt	-43.2611	128.886	0	N/A	N/A	4.18	11.86						0.513061	0.70282	18.6493	15.4973	38.2084	0.213095	0.513061									18.6493	15.4973	0.70282	0.513061
1017	[129]	Indian Ocean Spreading Ridges	Southeast Indian Ridge	ODP0187-1157B-002R-001/010-012	Basalt	-43.2613	128.884	0	N/A	N/A	3.99	11.9						0.513008	0.703277				0.202723	0.513008											0.703277	0.513008
1018	[129]	Indian Ocean Spreading Ridges	Southeast Indian Ridge	ODP0187-1157B-002R-001/050-053	Basalt	-43.2613	128.884	0	N/A	N/A	3.51	10.2						0.513042	0.703195				0.208059	0.513042											0.703195	0.513042
1019	[156]	Indian Ocean Spreading Ridges	Southeast Indian Ridge	ODP0187-1157B-002R-001/055-056	Basalt	-43.2613	128.884	0	N/A	N/A	3.99	11.8						0.51304	0.70283				0.204442	0.51304											0.70283	0.51304
1020	[125]	Indian Ocean Spreading Ridges	Southeast Indian Ridge	ODP0187-1157B-003R-001/055-058	Basalt	-43.2613	128.884	0	N/A	N/A	3.32	9.83						0.513038	0.702867	17.9842	15.456	37.757	0.204204	0.513038									17.9842	15.456	0.702867	0.513038
1021	[156]	Indian Ocean Spreading Ridges	Southeast Indian Ridge	ODP0187-1157B-004R-001/034-038	Basalt	-43.2613	128.884	0	N/A	N/A	3.94	11.42						0.513047	0.702679				0.208598	0.513047											0.702679	0.513047
1022	[156]	Indian Ocean Spreading Ridges	Southeast Indian Ridge	ODP0187-1157B-004R-001/136-138	Basalt	-43.2613	128.884	0	N/A	N/A	3.69	10.93						0.513043	0.702813				0.20412	0.513043											0.702813	0.513043
1023	[129]	Indian Ocean Spreading Ridges	Southeast Indian Ridge	ODP0187-1157B-004R-001/136-140/E	Basalt	-43.2613	128.884	0	N/A	N/A	3.96	11.7						0.513025	0.703444				0.204639	0.513025											0.703444	0.513025
1024	[129]	Indian Ocean Spreading Ridges	Southeast Indian Ridge	ODP0187-1157B-004R-001/136-140/G	Basalt	-43.2613	128.884	0	N/A	N/A								0.513044	0.702845																0.702845	0.513044
1025	[129]	Indian Ocean Spreading Ridges	Southeast Indian Ridge	ODP0187-1157B-004R-001/136-140/M	Basalt	-43.2613	128.884	0	N/A	N/A	3.53	10.4						0.513033	0.703294				0.20522	0.513033											0.703294	0.513033
1026	[125]	Indian Ocean Spreading Ridges	Southeast Indian Ridge	ODP0187-1157B-006R-001/043-047	Basalt	-43.2613	128.884	0	N/A	N/A	3.41	10.11						0.51305	0.702913	17.987	15.4566	37.758	0.203932	0.51305									17.987	15.4566	0.702913	0.51305
1027	[125]	Indian Ocean Spreading Ridges	Southeast Indian Ridge	ODP0187-1157B-008R-001/012-016	Basalt	-43.2613	128.884	0	N/A	N/A	3.47	10.46						0.51306	0.702852	17.9854	15.4575	37.7611	0.200576	0.51306									17.9854	15.4575	0.702852	0.51306
1028	[129]	Indian Ocean Spreading Ridges	Southeast Indian Ridge	ODP0187-1157B-008R-002/090-093	Basalt	-43.2613	128.884	0	N/A	N/A	3.57	10.5						0.513045	0.703243				0.20557	0.513045											0.703243	0.513045
1029	[125]	Indian Ocean Spreading Ridges	Southeast Indian Ridge	ODP0187-1158A-003R-001/010-013	Basalt	-43.9483	128.828	0	N/A	N/A	3.94	11.86						0.512982	0.703283	18.3142	15.4918	38.091	0.200856	0.512982									18.3142	15.4918	0.703283	0.512982
1030	[129]	Indian Ocean Spreading Ridges	Southeast Indian Ridge	ODP0187-1158B-004R-001/034-038	Basalt	-43.9464	128.828	0	N/A	N/A								0.513046	0.702694																0.702694	0.513046
1031	[129]	Indian Ocean Spreading Ridges	Southeast Indian Ridge	ODP0187-1158B-004R-001/046-048A	Basalt	-43.9464	128.828	0	N/A	N/A	5.13	14.7						0.513042	0.703642				0.210999	0.513042											0.703642	0.513042
1032	[129]	Indian Ocean Spreading Ridges	Southeast Indian Ridge	ODP0187-1158B-004R-001/046-048S	Basalt	-43.9464	128.828	0	N/A	N/A	4.28	12.3						0.513049	0.703043				0.210387	0.513049											0.703043	0.513049
1033	[125]	Indian Ocean Spreading Ridges	Southeast Indian Ridge	ODP0187-1158B-004R-001/111-114	Basalt	-43.9464	128.828	0	N/A	N/A	4.37	12.7						0.513066	0.702725	18.5812	15.5001	38.1773	0.208047	0.513066									18.5812	15.5001	0.702725	0.513066
1034	[125]	Indian Ocean Spreading Ridges	Southeast Indian Ridge	ODP0187-1159A-002R-001/020-024	Basalt	-45.9567	130	0	N/A	N/A	4.37	12.17						0.51308	0.702627	18.7117	15.5054	38.257	0.217108	0.51308									18.7117	15.5054	0.702627	0.51308
1035	[129]	Indian Ocean Spreading Ridges	Southeast Indian Ridge	ODP0187-1159A-005R-001/014-019A	Basalt	-45.9567	130	0	N/A	N/A	4.77	13.6						0.513049	0.70331				0.212061	0.513049											0.70331	0.513049
1036	[129]	Indian Ocean Spreading Ridges	Southeast Indian Ridge	ODP0187-1159A-005R-001/014-019M	Basalt	-45.9567	130	0	N/A	N/A	5	14.3						0.513043	0.702873				0.211405	0.513043											0.702873	0.513043
1037	[156]	Indian Ocean Spreading Ridges	Southeast Indian Ridge	ODP0187-1159A-006R-002/055-057	Basalt	-45.9567	130	0	N/A	N/A	3.98	11.38						0.513042	0.702633				0.211457	0.513042											0.702633	0.513042
1038	[125]	Indian Ocean Spreading Ridges	Southeast Indian Ridge	ODP0187-1159A-006R-002/083-087	Basalt	-45.9567	130	0	N/A	N/A	3.79	10.54						0.513072	0.702661	18.6604	15.5011	38.2166	0.217411	0.513072									18.6604	15.5011	0.702661	0.513072
1039	[129]	Indian Ocean Spreading Ridges	Southeast Indian Ridge	ODP0187-1159A-007R-001/014-018F	Basalt	-45.9567	130	0	N/A	N/A	4.31	12.2						0.513049	0.703359				0.213599	0.513049											0.703359	0.513049
1040	[129]	Indian Ocean Spreading Ridges	Southeast Indian Ridge	ODP0187-1159A-007R-001/014-018M	Basalt	-45.9567	130	0	N/A	N/A	6.11	17.6						0.513013	0.703546				0.209897	0.513013											0.703546	0.513013
1041	[156]	Indian Ocean Spreading Ridges	Southeast Indian Ridge	ODP0187-1159A-007R-001/139-141	Basalt	-45.9567	130	0	N/A	N/A	3.98	11.39						0.513045	0.702642				0.211271	0.513045											0.702642	0.513045
1042	[156]	Indian Ocean Spreading Ridges	Southeast Indian Ridge	ODP0187-1159A-007R-002/016-017	Basalt	-45.9567	130	0	N/A	N/A	3.98	11.37						0.513041	0.702628				0.211642	0.513041											0.702628	0.513041
1043	[156]	Indian Ocean Spreading Ridges	Southeast Indian Ridge	ODP0187-1160A-003R-001/019-021	Basalt	-44.01	134.998	0	N/A	N/A	1.48	4.35						0.513044	0.702533				0.205709	0.513044											0.702533	0.513044
1044	[125]	Indian Ocean Spreading Ridges	Southeast Indian Ridge	ODP0187-1160A-003R-001/019-021	Basalt	-44.01	134.998	0	N/A	N/A	3.45	9.96						0.513074	0.702542	18.8684	15.5203	38.3609	0.209432	0.513074									18.8684	15.5203	0.702542	0.513074
1045	[156]	Indian Ocean Spreading Ridges	Southeast Indian Ridge	ODP0187-1160B-001W-001/008-014	Basalt	-44.0082	134.998	0	N/A	N/A	2.27	5.84						0.513055	0.702576				0.235014	0.513055											0.702576	0.513055
1046	[129][128]	Indian Ocean Spreading Ridges	Southeast Indian Ridge	ODP0187-1160B-002R-001/021-025	Basalt	-44.0082	134.998	0	N/A	N/A	2.58	6.81						0.513057	0.702965	18.728	15.484	38.192	0.229063	0.513057									18.728	15.484	0.702965	0.513057
1047	[156]	Indian Ocean Spreading Ridges	Southeast Indian Ridge	ODP0187-1160B-003R-001/007-016	Basalt	-44.0082	134.998	0	N/A	N/A	1.56	4.19						0.513066	0.702563				0.225109	0.513066											0.702563	0.513066
1048	[125]	Indian Ocean Spreading Ridges	Southeast Indian Ridge	ODP0187-1160B-003R-001/066-068	Basalt	-44.0082	134.998	0	N/A	N/A	2.58	6.69						0.513076	0.702607	18.7161	15.4871	38.2132	0.233173	0.513076									18.7161	15.4871	0.702607	0.513076
1049	[129]	Indian Ocean Spreading Ridges	Southeast Indian Ridge	ODP0187-1160B-004R-002/082-085	Basalt	-44.0082	134.998	0	N/A	N/A								0.513063	0.703239																0.703239	0.513063
1050	[129][128]	Indian Ocean Spreading Ridges	Southeast Indian Ridge	ODP0187-1160B-004R-002/114-119	Basalt	-44.0082	134.998	0	N/A	N/A	2.07	5.29						0.513059	0.703019	18.872	15.504	38.297	0.23659	0.513059									18.872	15.504	0.703019	0.513059
1051	[125]	Indian Ocean Spreading Ridges	Southeast Indian Ridge	ODP0187-1160B-004R-002/122-126	Basalt	-44.0082	134.998	0	N/A	N/A	1.97	4.94						0.513107	0.702529	18.835	15.527	38.378	0.241116	0.513107									18.835	15.527	0.702529	0.513107
1052	[156]	Indian Ocean Spreading Ridges	Southeast Indian Ridge	ODP0187-1160B-006R-002/005-008	Basalt	-44.0082	134.998	0	N/A	N/A	2.48	7.13						0.513043	0.702641				0.210302	0.513043											0.702641	0.513043
1053	[156]	Indian Ocean Spreading Ridges	Southeast Indian Ridge	ODP0187-1160B-006R-002/096-098	Basalt	-44.0082	134.998	0	N/A	N/A	2.44	6.22						0.513069	0.702569				0.237182	0.513069											0.702569	0.513069
1054	[156]	Indian Ocean Spreading Ridges	Southeast Indian Ridge	ODP0187-1160B-007R-001/009-011	Basalt	-44.0082	134.998	0	N/A	N/A	2.5	7.18						0.513046	0.702634				0.210521	0.513046											0.702634	0.513046
1055	[128]	Indian Ocean Spreading Ridges	Southeast Indian Ridge	ODP0187-1160B-007R-001/012-014	Basalt	-44.0082	134.998	0	N/A	N/A										18.777	15.495	38.231											18.777	15.495
1056	[129]	Indian Ocean Spreading Ridges	Southeast Indian Ridge	ODP0187-1160B-007R-001/012-014	Basalt	-44.0082	134.998	0	N/A	N/A								0.513051	0.702536																0.702536	0.513051
1057	[129][128]	Indian Ocean Spreading Ridges	Southeast Indian Ridge	ODP0187-1160B-007R-001/049-052	Basalt	-44.0082	134.998	0	N/A	N/A	2.15	5.43						0.513053	0.702722	18.747	15.504	38.234	0.239398	0.513053									18.747	15.504	0.702722	0.513053
1058	[156]	Indian Ocean Spreading Ridges	Southeast Indian Ridge	ODP0187-1160B-008R-001/020-022	Basalt	-44.0082	134.998	0	N/A	N/A	2.44	6.21						0.513058	0.702573				0.237564	0.513058											0.702573	0.513058
1059	[128]	Indian Ocean Spreading Ridges	Southeast Indian Ridge	ODP0187-1160B-009R-001/000-002	Basalt	-44.0082	134.998	0	N/A	N/A										18.769	15.487	38.206											18.769	15.487
1060	[129]	Indian Ocean Spreading Ridges	Southeast Indian Ridge	ODP0187-1160B-009R-001/000-002	Basalt	-44.0082	134.998	0	N/A	N/A								0.513055	0.702541																0.702541	0.513055
1061	[156]	Indian Ocean Spreading Ridges	Southeast Indian Ridge	ODP0187-1160B-009R-001/005-007	Basalt	-44.0082	134.998	0	N/A	N/A	1.49	3.8						0.513061	0.702551				0.237075	0.513061											0.702551	0.513061
1062	[156]	Indian Ocean Spreading Ridges	Southeast Indian Ridge	ODP0187-1160B-009R-001/070-074	Basalt	-44.0082	134.998	0	N/A	N/A	2.45	6.23						0.513069	0.702591				0.237772	0.513069											0.702591	0.513069
1063	[125]	Indian Ocean Spreading Ridges	Southeast Indian Ridge	ODP0187-1160B-009R-001/127-129	Basalt	-44.0082	134.998	0	N/A	N/A	2.27	5.34						0.513096	0.702576	18.7657	15.4981	38.2517	0.257022	0.513096									18.7657	15.4981	0.702576	0.513096
1064	[129]	Indian Ocean Spreading Ridges	Southeast Indian Ridge	ODP0187-1160B-009R-003/021-026	Basalt	-44.0082	134.998	0	N/A	N/A								0.513046	0.702872																0.702872	0.513046
1065	[156]	Indian Ocean Spreading Ridges	Southeast Indian Ridge	ODP0187-1161A-003R-001,68-69	Basalt	-44.2866	129.051	0	N/A	N/A	3.52	10.29						0.513061	0.702837				0.206828	0.513061											0.702837	0.513061
1066	[129]	Indian Ocean Spreading Ridges	Southeast Indian Ridge	ODP0187-1161A-003R-001/001-005	Basalt	-44.2866	129.051	0	N/A	N/A	4.78	13.5						0.51303	0.703597				0.214079	0.51303											0.703597	0.51303
1067	[156]	Indian Ocean Spreading Ridges	Southeast Indian Ridge	ODP0187-1161A-003R-001/008-009	Basalt	-44.2866	129.051	0	N/A	N/A	3.51	10.28						0.513057	0.702851				0.206441	0.513057											0.702851	0.513057
1068	[125]	Indian Ocean Spreading Ridges	Southeast Indian Ridge	ODP0187-1161A-003R-001/073-077	Basalt	-44.2866	129.051	0	N/A	N/A	3.17	9.15						0.51308	0.702894	17.9743	15.4593	37.746	0.20947	0.51308									17.9743	15.4593	0.702894	0.51308
1069	[129]	Indian Ocean Spreading Ridges	Southeast Indian Ridge	ODP0187-1161A-004R-001/086-090	Basalt	-44.2866	129.051	0	N/A	N/A	3.13	8.72						0.513046	0.703437				0.217024	0.513046											0.703437	0.513046
1070	[125]	Indian Ocean Spreading Ridges	Southeast Indian Ridge	ODP0187-1161A-004R-001/120-124	Basalt	-44.2866	129.051	0	N/A	N/A	2.85	7.56						0.513052	0.703028	17.9182	15.4557	37.6837	0.227932	0.513052									17.9182	15.4557	0.703028	0.513052
1071	[129]	Indian Ocean Spreading Ridges	Southeast Indian Ridge	ODP0187-1161B-002R-001/032-034	Basalt	-44.2846	129.051	0	N/A	N/A	5.04	14.1						0.513052	0.703196				0.216119	0.513052											0.703196	0.513052
1072	[129]	Indian Ocean Spreading Ridges	Southeast Indian Ridge	ODP0187-1161B-003R-001/022-025	Basalt	-44.2846	129.051	0	N/A	N/A	4.11	11.7						0.513045	0.703523				0.212391	0.513045											0.703523	0.513045
1073	[125]	Indian Ocean Spreading Ridges	Southeast Indian Ridge	ODP0187-1161B-003R-001/039-042	Basalt	-44.2846	129.051	0	N/A	N/A	5.02	14.72						0.513033	0.702946	18.1564	15.4733	37.8952	0.206194	0.513033									18.1564	15.4733	0.702946	0.513033
1074	[125]	Indian Ocean Spreading Ridges	Southeast Indian Ridge	ODP0187-1162B-006R-001/069-074	Basalt	-44.6321	129.188	0	N/A	N/A	4.23	12.18						0.513065	0.703501	18.1136	15.4755	37.8487	0.209979	0.513065									18.1136	15.4755	0.703501	0.513065
1075	[156]	Indian Ocean Spreading Ridges	Southeast Indian Ridge	ODP0187-1162B-008R-001/080-082	Basalt	-44.6321	129.188	0	N/A	N/A	3.88	11.3						0.513042	0.703014				0.207603	0.513042											0.703014	0.513042
1076	[156]	Indian Ocean Spreading Ridges	Southeast Indian Ridge	ODP0187-1162B-008R-001/080-084	Basalt	-44.6321	129.188	0	N/A	N/A								0.513056	0.703044																0.703044	0.513056
1077	[125]	Indian Ocean Spreading Ridges	Southeast Indian Ridge	ODP0187-1163A-002R-002/067-070	Basalt	-44.4246	126.908	0	N/A	N/A	2.17	5.83						0.513013	0.702996	18.0699	15.4704	37.914	0.225045	0.513013									18.0699	15.4704	0.702996	0.513013
1078	[129]	Indian Ocean Spreading Ridges	Southeast Indian Ridge	ODP0187-1163A-003R-001/027-029	Basalt	-44.4246	126.908	0	N/A	N/A								0.512996	0.702927																0.702927	0.512996
1079	[125]	Indian Ocean Spreading Ridges	Southeast Indian Ridge	ODP0187-1163A-003R-002/002-006	Basalt	-44.4246	126.908	0	N/A	N/A	3.21	9.95						0.512999	0.703017	18.0494	15.4678	37.8998	0.195055	0.512999									18.0494	15.4678	0.703017	0.512999
1080	[129]	Indian Ocean Spreading Ridges	Southeast Indian Ridge	ODP0187-1163A-006R-001/104-109	Basalt	-44.4246	126.908	0	N/A	N/A	0.99	3.96						0.51238	0.711147				0.151131	0.51238
1081	[125]	Indian Ocean Spreading Ridges	Southeast Indian Ridge	ODP0187-1163A-006R-003/046-049	Basalt	-44.4246	126.908	0	N/A	N/A	3.5	9.79						0.512992	0.703064	18.0767	15.4669	37.9281	0.216153	0.512992									18.0767	15.4669	0.703064	0.512992
1082	[156]	Indian Ocean Spreading Ridges	Southeast Indian Ridge	ODP0187-1163A-008R-001/041-043	Basalt	-44.4246	126.908	0	N/A	N/A	3.35	10.41						0.512975	0.702983				0.194566	0.512975											0.702983	0.512975
1083	[129]	Indian Ocean Spreading Ridges	Southeast Indian Ridge	ODP0187-1163A-008R-001/051-056	Basalt	-44.4246	126.908	0	N/A	N/A	3.29	10.1						0.512969	0.703242				0.196946	0.512969											0.703242	0.512969
1084	[129]	Indian Ocean Spreading Ridges	Southeast Indian Ridge	ODP0187-1163A-009R-001/094-097	Basalt	-44.4246	126.908	0	N/A	N/A	2.93	8.37						0.512975	0.703232				0.211649	0.512975											0.703232	0.512975
1085	[156]	Indian Ocean Spreading Ridges	Southeast Indian Ridge	ODP0187-1163A-009R-002/000-002	Basalt	-44.4246	126.908	0	N/A	N/A	3.63	11.27						0.512963	0.702979				0.19474	0.512963											0.702979	0.512963
1086	[125]	Indian Ocean Spreading Ridges	Southeast Indian Ridge	ODP0187-1163A-010R-001/116-120	Basalt	-44.4246	126.908	0	N/A	N/A	3.35	10.15						0.512988	0.702995	18.0757	15.4633	37.9165	0.199551	0.512988									18.0757	15.4633	0.702995	0.512988
1087	[156]	Indian Ocean Spreading Ridges	Southeast Indian Ridge	ODP0187-1164A-002R-001/001-005	Basalt	-43.7483	127.748	0	N/A	N/A	2.69	8						0.512975	0.702912				0.203299	0.512975											0.702912	0.512975
1088	[125]	Indian Ocean Spreading Ridges	Southeast Indian Ridge	ODP0187-1164A-004R-001/020-024	Basalt	-43.7483	127.748	0	N/A	N/A	3.42	9.94						0.513033	0.702923	18.0418	15.4607	37.8584	0.208027	0.513033									18.0418	15.4607	0.702923	0.513033
1089	[156]	Indian Ocean Spreading Ridges	Southeast Indian Ridge	ODP0187-1164B-001W-CC/023-025	Basalt	-43.7492	127.746	0	N/A	N/A	2.91	8.43						0.512979	0.702945				0.208708	0.512979											0.702945	0.512979
1090	[125]	Indian Ocean Spreading Ridges	Southeast Indian Ridge	ODP0187-1164B-003R-001/093-097	Basalt	-43.7492	127.746	0	N/A	N/A	2.94	8.3						0.513005	0.702966	18.0469	15.4703	37.8838	0.214164	0.513005									18.0469	15.4703	0.702966	0.513005
1091	[156]	Indian Ocean Spreading Ridges	Southeast Indian Ridge	ODP0187-1164B-004R-002/135-138	Basalt	-43.7492	127.746	0	N/A	N/A	2.59	7.41						0.512986	0.702939				0.211328	0.512986											0.702939	0.512986
1092	[156]	Indian Ocean Spreading Ridges	Southeast Indian Ridge	ODP0187-1164B-008R-001/036-039	Basalt	-43.7492	127.746	0	N/A	N/A	2.86	8.2						0.512987	0.702934				0.210876	0.512987											0.702934	0.512987
1093	[129]	Indian Ocean Spreading Ridges	Southeast Indian Ridge	ODP0187-1164B-008R-001/081-086	Basalt	-43.7492	127.746	0	N/A	N/A								0.512994	0.702901																0.702901	0.512994
1094	[129]	Indian Ocean Spreading Ridges	Southeast Indian Ridge	ODP0187-1164B-008R-001/084-088A	Basalt	-43.7492	127.746	0	N/A	N/A	3.13	9.74						0.512986	0.7034				0.194294	0.512986											0.7034	0.512986
1095	[129]	Indian Ocean Spreading Ridges	Southeast Indian Ridge	ODP0187-1164B-008R-001/084-088M	Basalt	-43.7492	127.746	0	N/A	N/A	2.85	8.06						0.512987	0.703363				0.213789	0.512987											0.703363	0.512987
1096	[129]	Indian Ocean Spreading Ridges	Southeast Indian Ridge	ODP0187-1164B-010R-001/017-020	Basalt	-43.7492	127.746	0	N/A	N/A	2.54	7.24						0.512982	0.703301				0.212114	0.512982											0.703301	0.512982
1097	[125]	Indian Ocean Spreading Ridges	Southeast Indian Ridge	ODP0187-1164B-010R-001/021-025	Basalt	-43.7492	127.746	0	N/A	N/A	2.58	7.13						0.513001	0.702946	18.0664	15.4692	37.8911	0.218779	0.513001									18.0664	15.4692	0.702946	0.513001
1098	[168][170]	Indian Ocean Spreading Ridges	Southeast Indian Ridge	VEM0018-204	Tholeiite	-24.2	76.98	0	N/A	N/A	4.21								0.7043
1099	[126][94]	Indian Ocean Spreading Ridges	Southeast Indian Ridge	VEM0033-1-001	Basalt	-50.408	131.005	0	N/A	N/A	4.77	15.9						0.51305	0.70261	18.75	15.49	38.19	0.181385	0.51305									18.75	15.49	0.70261	0.51305
1102	[95]	Indian Ocean Spreading Ridges	Southeast Indian Ridge	VEM0033-1-001-A	Basalt	-50.408	131.005	0	N/A	N/A									0.7026	18.68	15.5	38.13											18.68	15.5
1103	[95]	Indian Ocean Spreading Ridges	Southeast Indian Ridge	VEM0033-1-001-G	Basalt	-50.408	131.005	0	N/A	N/A	4.77	15.9						0.51305	0.70261	18.75	15.49	38.19	0.181385	0.51305									18.75	15.49	0.70261	0.51305
1104	[85]	Indian Ocean Spreading Ridges	Southeast Indian Ridge	VEM0033-1-002-001	Basalt	-50.267	132.55	0	N/A	N/A									0.70575
1105	[127][126][111]	Indian Ocean Spreading Ridges	Southeast Indian Ridge	VEM0033-1-002-019	Basalt	-50.267	132.55	0	N/A	N/A	4.5	12.93						0.513058	0.70261	18.911	15.514	38.319	0.210424	0.513058									18.911	15.514	0.70261	0.513058
1106	[126][125]	Indian Ocean Spreading Ridges	Southeast Indian Ridge	VEM0033-1-002-019	Basalt	-50.267	132.55	0	N/A	N/A								0.513072
1107	[85]	Indian Ocean Spreading Ridges	Southeast Indian Ridge	VEM0033-1-003-002	Basalt	-50.417	135.09	0	N/A	N/A									0.70492
1108	[127][126][111]	Indian Ocean Spreading Ridges	Southeast Indian Ridge	VEM0033-1-003-004	Basalt	-50.417	135.09	0	N/A	N/A	3.848	12.315						0.513074	0.70257	18.998	15.613	38.468	0.188923	0.513074									18.998	15.613	0.70257	0.513074
1109	[126][125]	Indian Ocean Spreading Ridges	Southeast Indian Ridge	VEM0033-1-003-004	Basalt	-50.417	135.09	0	N/A	N/A								0.513058
1112	[127][163][111]	Indian Ocean Spreading Ridges	Southeast Indian Ridge	VEM0033-1-005-005	Basalt	-48.738	127.08	0	N/A	N/A	3.09	8.89						0.513118	0.70255	18.572	15.482	38.097	0.210157	0.513118									18.572	15.482	0.70255	0.513118
1113	[126][85][125]	Indian Ocean Spreading Ridges	Southeast Indian Ridge	VEM0033-1-005-005	Basalt	-48.738	127.08	0	N/A	N/A	2.72	8.14						0.513074					0.202036	0.513074
1116	[127][126][163][125]	Indian Ocean Spreading Ridges	Southeast Indian Ridge	VEM0033-2-007-003	Basalt	-49.033	124	0	N/A	N/A	3.57	11.8						0.513007	0.7029	18.057	15.439	37.858	0.182921	0.513007									18.057	15.439	0.7029	0.513007
1117	[126][85][125]	Indian Ocean Spreading Ridges	Southeast Indian Ridge	VEM0033-2-007-003	Basalt	-49.033	124	0	N/A	N/A								0.513012
1120	[126][85]	Indian Ocean Spreading Ridges	Southeast Indian Ridge	VEM0033-2-008-002	Basalt	-49.467	121.033	0	N/A	N/A									0.70612
1122	[127][126]	Indian Ocean Spreading Ridges	Southeast Indian Ridge	VEM0033-2-008-008	Basalt	-49.467	121.033	0	N/A	N/A	3.29	10.79						0.512972	0.70314	18.225	15.465	38.211	0.184352	0.512972									18.225	15.465	0.70314	0.512972
1123	[126][125]	Indian Ocean Spreading Ridges	Southeast Indian Ridge	VEM0033-2-009-001	Basalt	-49.808	119.175	0	N/A	N/A								0.513017	0.702849	18.0908	15.4886	38.0125											18.0908	15.4886	0.702849	0.513017
1124	[127][126]	Indian Ocean Spreading Ridges	Southeast Indian Ridge	VEM0033-2-009-002	Basalt	-49.808	119.175	0	N/A	N/A	3.15	8.9						0.513036	0.70293	18.248	15.489	38.003	0.213993	0.513036									18.248	15.489	0.70293	0.513036
1127	[85]	Indian Ocean Spreading Ridges	Southeast Indian Ridge	VEM0033-2-011-001	Basalt	-49.858	118	0	N/A	N/A									0.7096
1128	[85]	Indian Ocean Spreading Ridges	Southeast Indian Ridge	VEM0033-2-011-002	Basalt	-49.858	118	0	N/A	N/A									0.71384
697	[89]	Indian Ocean Spreading Ridges	Southeast Indian Ridge	ARGDODO-114-A	Basalt	-24.117	72.433	0	N/A	1.22	3.22	9.76						0.513119					0.199478	0.513119
850	[117]	Indian Ocean Spreading Ridges	Southeast Indian Ridge	MELBMRG-5-BB4-000	Basalt	-49.7	125.428	0	N/A	0.3										17.709	15.411	37.565											17.709	15.411
851	[117]	Indian Ocean Spreading Ridges	Southeast Indian Ridge	MELBMRG-5-BB4-007A	Basalt	-47.75	126.179	0	N/A	1.3										17.898	15.464	37.773											17.898	15.464
852	[117]	Indian Ocean Spreading Ridges	Southeast Indian Ridge	MELBMRG-5-BB5-001A	Basalt	-48.46	126.664	0	N/A	0.3										18.439	15.479	38.056											18.439	15.479
853	[117]	Indian Ocean Spreading Ridges	Southeast Indian Ridge	MELBMRG-5-BB5-001B	Basalt	-48.98	127.233	0	N/A	0.1										18.638	15.451	38.098											18.638	15.451
854	[117]	Indian Ocean Spreading Ridges	Southeast Indian Ridge	MELBMRG-5-BB5-004A	Basalt	-47.72	126.986	0	N/A	0.6										17.982	15.463	37.858											17.982	15.463
855	[117]	Indian Ocean Spreading Ridges	Southeast Indian Ridge	MELBMRG-5-BB5-004B	Basalt	-47.49	127.605	0	N/A	1.3										18	15.473	37.869											18	15.473
1100	[127][126][163][125][111]	Indian Ocean Spreading Ridges	Southeast Indian Ridge	VEM0033-1-001-002	Basalt	-50.408	131.005	0	N/A	0	4.91	17.052						0.513065	0.70264	18.805	15.499	38.262	0.174096	0.513065									18.805	15.499	0.70264	0.513065
1101	[126][125]	Indian Ocean Spreading Ridges	Southeast Indian Ridge	VEM0033-1-001-002	Basalt	-50.408	131.005	0	N/A	0								0.513072
1110	[127][126][111]	Indian Ocean Spreading Ridges	Southeast Indian Ridge	VEM0033-1-004-001	Basalt	-50.215	137.555	0	N/A	0.1	2.63	7.45						0.513139	0.70253	18.812	15.503	38.166	0.213447	0.513139									18.812	15.503	0.70253	0.513139
1111	[126][85][125]	Indian Ocean Spreading Ridges	Southeast Indian Ridge	VEM0033-1-004-001	Basalt	-50.215	137.555	0	N/A	0.1								0.513086	0.70297																0.70297	0.513086
1114	[127]	Indian Ocean Spreading Ridges	Southeast Indian Ridge	VEM0033-1-006-001	Basalt	-50.3	130.417	0	N/A	< 0.34	4.8	13.99						0.513102	0.70259	18.617	15.48	38.095	0.207448	0.513102									18.617	15.48	0.70259	0.513102
1115	[126][85][125]	Indian Ocean Spreading Ridges	Southeast Indian Ridge	VEM0033-1-006-001	Basalt	-50.3	130.417	0	N/A	< 0.34	4.7	14.07						0.513077	0.70415				0.20197	0.513077											0.70415	0.513077
1118	[127][126][125]	Indian Ocean Spreading Ridges	Southeast Indian Ridge	VEM0033-2-007-007	Basalt	-49.033	124	0	N/A	< 0.3	2.71	8.07						0.513007	0.703	18.008	15.462	37.794	0.203036	0.513007									18.008	15.462	0.703	0.513007
1119	[126][125]	Indian Ocean Spreading Ridges	Southeast Indian Ridge	VEM0033-2-007-007	Basalt	-49.033	124	0	N/A	< 0.3								0.513035
1121	[126][125]	Indian Ocean Spreading Ridges	Southeast Indian Ridge	VEM0033-2-008-006	Basalt	-49.467	121.033	0	N/A	< 1.2								0.512988	0.703212	18.2441	15.4927	38.2809											18.2441	15.4927	0.703212	0.512988
1125	[127][126]	Indian Ocean Spreading Ridges	Southeast Indian Ridge	VEM0033-2-010-010	Basalt	-49.917	115.375	0	N/A	< 0.2	2.74	8.35						0.512978	0.70346	17.772	15.494	37.837	0.198398	0.512978									17.772	15.494	0.70346	0.512978
1126	[126][125]	Indian Ocean Spreading Ridges	Southeast Indian Ridge	VEM0033-2-010-010	Basalt	-49.917	115.375	0	N/A	< 0.2								0.513006		17.7835	15.5084	37.887											17.7835	15.5084
1129	[127][126]	Indian Ocean Spreading Ridges	Southeast Indian Ridge	VEM0033-2-011-006	Basalt	-49.858	118	0	N/A	0.2	2.6	7.64						0.513041	0.70284	17.944	15.409	37.743	0.20576	0.513041									17.944	15.409	0.70284	0.513041
1130	[126][125]	Indian Ocean Spreading Ridges	Southeast Indian Ridge	VEM0033-2-011-006	Basalt	-49.858	118	0	N/A	0.2								0.51304

## Sheet: Reference
Number	Reference
[1]	ALIBERT C. ; 1991; MINERALOGY AND GEOCHEMISTRY OF A BASALT FROM SITE 738: IMPLICATIONS FOR THE TECTONIC HISTORY OF THE SOUTHERNMOST PART OF THE KERGUELEN PLATEAU ; PROC. OCEAN DRILL. PROGRAM, SCIENT. RESULTS 119 293-298
[2]	BAKSI A. K. ; 1995; PETROGENESIS AND TIMING OF VOLCANISM IN THE RAJMAHAL FLOOD BASALT PROVINCE, NORTHEASTERN INDIA ; CHEM. GEOL. 121 73-90
[4]	COFFIN, M. F., PRINGLE, M. S., DUNCAN, R. A., GLADCZENKO, T. P., STOREY, M., MÜLLER, R. D., AND GAHAGAN, L. A., 2002, KERGUELEN HOTSPOT MAGMA OUTPUT SINCE 130 MA: JOURNAL OF PETROLOGY, V. 43, NO. 7, P. 1121-1139.
[5]	COLWELL J. B., SYMONDS P. A., CRAWFORD A. J. ; 1994; THE NATURE OF THE WALLABY (CUVIER) PLATEAU AND OTHER IGNEOUS PROVINCES OF THE WEST AUSTRALIAN MARGIN ; AGSO J. AUSTRALIAN GEOL. GEOPHYS. 15 137-156
[6]	DADD, K. A., KELLERSON, L., BORISSOVA, I., AND NELSON, G., 2015, MULTIPLE SOURCES FOR VOLCANIC ROCKS DREDGED FROM THE WESTERN AUSTRALIAN RIFTED MARGIN: MARINE GEOLOGY, V. 368, P. 42-57.
[7]	DAVIES H., SUN SHEN-SU, FREY F. A., GAUTIER I., MCCULLOCH M. T., PRICE R. C., BASSIAS Y., KLOOTWIJK C. T., LECLAIRE L. ; 1989; BASALT BASEMENT FROM THE KERGUELEN PLATEAU AND THE TRAIL OF A DUPAL PLUME ; CONTRIB. MINERAL. PETROL. 103 457-469
[8]	DOUCET S., SCOATES J. S., WEIS D., GIRET A. ; 2005; CONSTRAINING THE COMPONENTS OF THE KERGUELEN MANTLE PLUME: A HF-PB-SR-ND ISOTOPIC STUDY OF PICRITES AND HIGH-MGO BASALTS FROM THE KERGUELEN ARCHIPELAGO ; GEOCHEMISTRY GEOPHYSICS GEOSYSTEMS 6 2005
[9]	DUNCAN, R. A., 2002, A TIME FRAME FOR CONSTRUCTION OF THE KERGUELEN PLATEAU AND BROKEN RIDGE: JOURNAL OF PETROLOGY, V. 43, NO. 7, P. 1109-1119.
[10]	FREY F. A., MCNAUGHTON N. J., NELSON D. R., DE LAETER J. R., DUNCAN R. A. ; 1996; THE PETROGENESIS OF THE BUNBURY BASALT, WESTERN AUSTRALIA: INTERACTION BETWEEN THE KERGUELEN PLUME AND GONDWANA LITHOSPHRE? ; EARTH PLANET. SCI. LETT. 144 163-183
[11]	FREY F. A., WEIS D., BORISOVA A. YU., XU GUANGPING ; 2002; INVOLVEMENT OF CONTINENTAL CRUST IN THE FORMATION OF THE CRETACEOUS KERGUELEN PLATEAU: NEW PERSPECTIVES FROM ODP LEG 120 SITES ; J. PETROL. 43 1207-1239
[12]	GHATAK, A., AND BASU, A. R., 2011, VESTIGES OF THE KERGUELEN PLUME IN THE SYLHET TRAPS, NORTHEASTERN INDIA: EARTH AND PLANETARY SCIENCE LETTERS, V. 308, NO. 1–2, P. 52-64.
[14]	INGLE S. P., WEIS D., FREY F. A. ; 2002; INDIAN CONTINENTAL CRUST RECOVERED FROM ELAN BANK, KERGUELEN PLATEAU (ODP LEG 183, SITE 1137) ; J. PETROL. 43 1241-1257
[15]	INGLE S. P., WEIS D., SCOATES J. S., FREY F. A. ; 2002; RELATIONSHIP BETWEEN THE EARLY KERGUELEN PLUME AND CONTINENTAL FLOOD BASALTS OF THE PALEO-EASTERN GONDWANAN MARGINS ; EARTH PLANET. SCI. LETT. 197 35-50
[16]	KENT R. W., SAUNDERS A. D., KEMPTON P. D., GHOSE N. C. ; 1997; RAJMAHAL BASALTS, EASTERN INDIA: MANTLE SOURCES AND MELT DISTRIBUTION AT A VOLCANIC RIFT MARGIN| LARGE IGNEOUS PROVINCES (MAHONEY, J.J. , COFFIN, M. F.), AGU, WASHINGTON DC 145-182
[18]	KENT, R. W., PRINGLE, M. S., MÜLLER, R. D., SAUNDERS, A. D., AND GHOSE, N. C., 2002, 40AR/39AR GEOCHRONOLOGY OF THE RAJMAHAL BASALTS, INDIA, AND THEIR RELATIONSHIP TO THE KERGUELEN PLATEAU: JOURNAL OF PETROLOGY, V. 43, NO. 7, P. 1141-1153.
[19]	KIEFFER B., ARNDT N. T., WEIS D. ; 2002; A BIMODAL ALKALIC SHIELD VOLCANO ON SKIFF BANK: ITS PLACE IN THE EVOLUTION OF THE KERGUELEN PLATEAU ; J. PETROL. 43 1259-1286
[20]	MAHONEY J. J., JONES W. B., FREY F. A., SALTERS V. J. M., PYLE D. G., DAVIES H. L. ; 1995; GEOCHEMICAL CHARACTERISTICS OF LAVAS FROM BROKEN RIDGE, THE NATURALISTE PLATEAU AND SOUTHERNMOST KERGUELEN PLATEAU: CREATACEOUS PLATEAU VOLCANISM IN THE SOUTHEAST INDIAN OCEAN ; CHEM. GEOL. 120 315-345
[21]	NEAL C. R., MAHONEY J. J., CHAZEY W. J. III ; 2002; MANTLE SOURCES AND THE HIGHLY VARIABLE ROLE OF CONTINENTAL LITHOSPHERE IN BASALT PETROGENESIS OF THE KERGUELEN PLATEAU AND BROKEN RIDGE LIP: RESULTS FROM ODP LEG 183 ; J. PETROL. 43 1177-1205
[22]	OLIEROOK, H. K. H., JOURDAN, F., MERLE, R. E., TIMMS, N. E., KUSZNIR, N. J., AND MUHLING, J., 2016, BUNBURY BASALT: GONDWANA BREAKUP PRODUCTS OR EARLIEST VESTIGES OF THE KERGUELEN MANTLE PLUME?: EARTH AND PLANETARY SCIENCE LETTERS, V. 440, P. 20-32.
[23]	OLIEROOK, H. K. H., MERLE, R. E., JOURDAN, F., SIRCOMBE, K., FRASER, G., TIMMS, N. E., NELSON, G., DADD, K. A., KELLERSON, L., AND BORISSOVA, I., 2015, AGE AND GEOCHEMISTRY OF MAGMATISM ON THE OCEANIC WALLABY PLATEAU AND IMPLICATIONS FOR THE OPENING OF THE INDIAN OCEAN: GEOLOGY, V. 43, P. 971-974.
[24]	OLIEROOK, H. K. H., JIANG, Q., JOURDAN, F., CHIARADIA, M., 2019, GREATER KERGUELEN LARGE IGNEOUS PROVINCE REVEALS NO ROLE FOR KERGUELEN MANTLE PLUME IN THE CONTINENTAL BREAKUP OF EASTERN GONDWANA: EARTH AND PLANETARY SCIENCE LETTERS, V. 511, P. 244-255.
[25]	PYLE, D. G., CHRISTE, D. M., MAHONEY, J. J., AND DUNCAN, R. A., 1995, GEOCHEMISTRY AND GEOCHRONOLOGY OF ANCIENT SOUTHEAST INDIAN OCEAN AND SOUTHWEST PACIFIC OCEAN SEAFLOOR: JOURNAL OF GEOPHYSICAL RESEARCH, V. B100, P. 22261-22282.
[26]	SALTERS V. J. M., STOREY M., SEVIGNY J. H., WHITECHURCH H. ; 1992; TRACE ELEMENT AND ISOTOPIC CHARACTERISTICS OF KERGUELEN-HEARD PLATEAU BASALTS ; PROC. OCEAN DRILL. PROGRAM, SCIENT. RESULTS 120 55-62
[27]	STOREY M., KENT R. W., SAUNDERS A. D., SALTERS V. J. M., HERGT J. M., WHITECHURCH H., SEVIGNY J. H., THIRLWALL M. F., LEAT P. T., GHOSE N. C., GIFFORD M. G. ; 1992; LOWER CRETACEOUS VOLCANIC ROCKS ALONG CONTINENTAL MARGINS AND THEIR RELATIONSHIP TO THE KERGUELEN PLATEAU ; PROC. OCEAN DRILL. PROGRAM, SCIENT. RESULTS 120 33-54
[28]	WEIS D., BASSIAS Y., GAUTIER I., MENNESSIER J. P. ; 1989; DUPAL ANOMALY IN EXISTENCE 115 MA AGO: EVIDENCE FROM ISOTOPE STUDY OF THE KERGUELEN PLATEAU (SOUTH INDIAN OCEAN) ; GEOCHIM. COSMOCHIM. ACTA 53 2125-2131
[29]	WEIS D., FREY F. A., SCHLICH R., SCHAMING M., MONTIGNY R., DAMASCENO D., MATTIELLI N., NICOLAYSEN K. P., SCOATES J. S. ; 2002; TRACE OF THE KERGUELEN MANTLE PLUME: EVIDENCE FROM SEAMOUNTS BETWEEN THE KERGUELEN ARCHIPELAGO AND HEARD ISLAND, INDIAN OCEAN ; GEOCHEMISTRY GEOPHYSICS GEOSYSTEMS 3 2002
[30]	WEIS D., INGLE S. P., DAMASCENO D., FREY F. A., NICOLAYSEN K. P., BARLING J. ; 2001; ORIGIN OF CONTINENTAL COMPONENTS IN INDIAN OCEAN BASALTS: EVIDENCE FROM ELAN BANK (KERGUELEN PLATEAU, ODP LEG 183, SITE 1173) ; GEOLOGY 29 147-150
[31]	ZHU DI-CHENG, MO XUANXUE, PAN GUI-TANG, ZHAO ZHIDAN, DONG GUOCHEN, SHI YU-RUO, LIAO ZHONGLI, WANG LIQUAN, ZHOU CHANGYONG ; 2008; PETROGENESIS OF THE EARLIEST EARLY CRETACEOUS MAFIC ROCKS FROM THE CONA AREA OF THE EASTERN TETHYAN HIMALAYA IN SOUTH TIBET: INTERACTION BETWEEN THE INCUBATING KERGUELEN PLUME AND THE EASTERN GREATER INDIA LITHOSPHERE? ; LITHOS 100 147-173
[32]	ZHU DI-CHENG, PAN GUI-TANG, MO XUANXUE, LIAO ZHONGLI, JIANG XINSHENG, WANG LIQUAN, ZHAO ZHIDAN ; 2007; PETROGENESIS OF VOLCANIC ROCKS IN THE SANGXIU FORMATION, CENTRAL SEGMENT OF TETHYAN HIMALAYA: A PROBABLE EXAMPLE OF PLUME-LITHOSPHERE INTERACTION ; J. ASIAN EARTH SCI. 29 320-335
[33]	ZHU DI-CHENG, PAN GUI-TANG, MO XUANXUE, WANG LIQUAN, LIAO ZHONGLI, JIANG XINSHENG, GENG QUANRU ; 2005; SHRIMP U-PB ZIRCON DATING FOR THE DACITE OF THE SANGXIU FORMATION IN THE CENTRAL SEGMENT OF TETHYAN HIMALAYA AND ITS IMPLICATIONS ; CHIN. SCI. BULL. 50 563-568
[34]	ZHU, D., MO, X., PAN, G., ZHAO, Z., DONG, G., SHI, Y., LIAO, Z., WANG, L., AND ZHOU, C., 2008, PETROGENESIS OF THE EARLIEST EARLY CRETACEOUS MAFIC ROCKS FROM THE CONA AREA OF THE EASTERN TETHYAN HIMALAYA IN SOUTH TIBET: INTERACTION BETWEEN THE INCUBATING KERGUELEN PLUME AND THE EASTERN GREATER INDIA LITHOSPHERE?: LITHOS, V. 100, NO. 1–4, P. 147-173.
[36]	BARLING J., GOLDSTEIN S. L. ; 1990 EXTREME ISOTOPIC VARIATIONS IN HEARD ISLAND LAVAS AND THE NATURE OF MANTLE RESERVOIRS ; NATURE 348 59-62
[37]	BARLING J., GOLDSTEIN S. L., NICHOLLS I. A. ; 1994; GEOCHEMISTRY OF HEARD ISLAND (SOUTHERN INDIAN OCEAN): CHARACTERIZATION OF AN ENRICHED MANTLE COMPONENT AND IMPLICATIONS FOR ENRICHMENT OF THE SUB-INDIAN OCEAN MANTLE ; J. PETROL. 35 1017-1053
[39]	DOSSO L., MURTHY V. R. ; A ND ISOTOPIC STUDY OF THE KERGUELEN ISLANDS: INFERENCES ON ENRICHED OCEANIC MANTLE SOURCES ; EARTH PLANET. SCI. LETT. 48 268-276
[40]	DOSSO L., VIDAL P., CANTAGREL J. M., LAMEYRE J., MAROT A., ZIMINE S. ; 1979; "KERGUELEN: CONTINENTAL FRAGMENT OR OCEANIC ISLAND?": PETROLOGY AND ISOTOPIC GEOCHEMISTRY EVIDENCE ; EARTH PLANET. SCI. LETT. 43 46-60
[42]	DOUCET S., WEIS D., SCOATES J. S., NICOLAYSEN K. P., FREY F. A., GIRET A. ; 2002; THE DEPLETED MANTLE COMPONENT IN KERGUELEN ARCHIPELAGO BASALTS: PETROGENESIS F THOLEIITIC-TRANSITIONAL BASALTS FROM THE LORANCHET PENINSULA ; J. PETROL. 43 1341-1366
[43]	DUNCAN, R., QUILTY, P., BARLING, J. & FOX, J. 2016; GEOLOGICAL DEVELOPMENT OF HEARD ISLAND, CENTRAL KERGUELEN PLATEAU. AUSTRALIAN JOURNAL OF EARTH SCIENCES 63, 81-89 (2016).
[46]	FREY F. A., NICOLAYSEN K. P., KUBIT B. K., WEIS D., GIRET A. ; 2002; FLOOD BASALT FROM MONT TOURMENTE IN THE CENTRAL KERGUELEN ARCHIPELAGO: THE CHANGE FROM TRANSITIONAL TO ALKALIC BASALT ~25 MA ; J. PETROL. 43 1367-1387
[47]	FREY F. A., WEIS D. ; 1995; TEMPORAL EVOLUTION OF THE KERGUELEN PLUME: GEOCHEMICAL EVIDENCE FROM 38 TO 82 MA LAVAS FORMING THE NINETYEAST RIDGE ; CONTRIB. MINERAL. PETROL. 121 12-28
[48]	FREY F. A., WEIS D., YANG HUAI-JEN, NICOLAYSEN K. P., LEYRIT H., GIRET A. ; 200; TEMPORAL GEOCHEMICAL TRENDS IN KERGUELEN ARCHIPELAGO BASALTS: EVIDENCE FOR DECREASING MAGMA SUPPLY FROM THE KERGUELEN PLUME ; CHEM. GEOL. 164 61-80
[49]	GAGNEVIN D., ETHIEN R., BONIN B., MOINE B. N., FERAUD G., GERBE M. C., COTTIN J.-Y., MICHON G., TOURPIN S., MAMIAS G., PERRACHE C., GIRET A. ; 2003; OPEN-SYSTEM PROCESSES IN THE GENESIS OF SILICA-OVERSATURATED ALKALINE ROCKS OF THE RALLIER-DU-BATY OENINSULA, KERGUELEN ARCHIPELAGO (INDIAN OCEAN) ; J. VOLCANOL. GEOTHERM. RES. 123 267-300
[50]	GAUTIER I., WEIS D., MENNESSIER J. P., VIDAL P., GIRET A., LOUBET M. ; 1990; PETROLOGY AND GEOCHEMISTRY OF THE KERGUELEN ARCHIPELAGO BASALTS (SOUTH INDIAN OCEAN): EVOLUTION OF THE MANTLE SOURCES FROM RIDGE TO INTRAPLATE POSITION ; EARTH PLANET. SCI. LETT. 100 59-76
[51]	GIRET A., LAMEYRE J. ; 1983; A STUDY OF KERGUELEN PLUTONISM: PETROLOGY, GEOCHRONOLOGY AND GEOLOGICAL IMPLICATIONS| ANTARCTIC EARTH SCIENCES, 4TH INT. SYMP. (OLI VER, R. L., JAMES, P. R., JAGO, J. B.), CAMBRIDGE UNIV. PRESS, CAMBRIDGE 646-651
[54]	HILTON D. R., BARLING J., WHELLER G. E. ; 1995; EFFECT OF SHALLOW-LEVEL CONTAMINATION ON THE HELIUM ISOTOPE SYSTEMATICS OF OCEAN-ISLAND LAVAS ; NATURE 373 330-333
[58]	MATTIELLI N., WEIS D., GREGOIRE M., MENNESSIER J. P., COTTIN J.-Y., GIRET A. ; 1996; KERGUELEN BASIC AND ULTRABASIC XENOLITHS: EVIDENCE FOR LONG-LIVED KERGUELEN HOTSPOT ACTIVITY ; LITHOS 37 261-280
[59]	NOBRE SILVA I. G., WEIS D., BARLING J., SCOATES J. S. ; 2009; LEACHING SYSTEMATICS AND MATRIX ELIMINATION FOR THE DETERMINATION OF HIGH-PRECISION PB ISOTOPE COMPOSITIONS OF OCEAN ISLAND BASALTS ; GEOCHEMISTRY GEOPHYSICS GEOSYSTEMS 10 2009
[60]	NOBRE SILVA I. G., WEIS D., SCOATES J. S. ; 2010; EFFECTS OF ACID LEACHING ON THE SR-ND-HF COMPOSITIONS OF OCEAN ISLAND BASALTS ; GEOCHEMISTRY GEOPHYSICS GEOSYSTEMS 11 2010
[61]	NOBRE SILVA I. G., WEIS D., SCOATES J. S., BARLING J. ; 2013; THE NINETYEAST RIDGE AND ITS RELATION TO THE KERGUELEN, AMSTERDAM AND ST. PAUL HOTSPOTS IN THE INDIAN OCEAN ; J. PETROL. 54 1177-1210
[63]	REISBERG L., ZINDLER A., MARCANTONIO F., WHITE W., WYMAN D. A., WEAVER B. L. ; 1993; OS ISOTOPE SYSTEMATICS IN OCEAN ISLAND BASALTS ; EARTH PLANET. SCI. LETT. 120 149-167
[64]	SALTERS V. J. M., HART S. R. ; 1991; THE MANTLE SOURCES OF OCEAN RIDGES, ISLANDS AND ARCS: THE HF-ISOTOPE CONNECTION ; EARTH PLANET. SCI. LETT. 104 364-380
[65]	SALTERS V. J. M., WHITE W. M. ; 1998; HF ISOTOPE CONSTRAINTS ON MANTLE EVOLUTION ; CHEM. GEOL. 145 447-460
[66]	SAUNDERS A. D., STOREY M., GIRSON I. L., LEAT P. T., HERGT J. M., THOMPSON R. N. ; 1991; CHEMICAL AND ISOTOPIC CONSTRAINTS ON THE ORIGIN OF BASALTS FROM NINETYEAST RIDGE, INDIAN OCEAN: RESULTS FROM DSDP LEGS 22 AND 26 AND ODP LEG 121 ; PROC. OCEAN DRILL. PROGRAM, SCIENT. RESULTS 121 559-590
[67]	SCOATES J. S., WEIS D., FRANSSENS M., MATTIELLI N., ANNELL H., FREY F. A., NICOLAYSEN K. P., GIRET A. ; 2008; THE VAL GABBRO PLUTONIC SUITE: A SUB-VOLCANIC INTRUSION EMPLACED AT THE END OF FLOOD BASALT VOLCANISM ON THE KERGUELEN ARCHIPELAGO ; J. PETROL. 49 79-105
[68]	STOREY M., SAUNDERS A. D., TARNEY J., LEAT P. T., THIRLWALL M. F., THOMPSON R. N., MENZIES M. A., MARRINER G. F. ; 1988; GEOCHEMICAL EVIDENCE FOR PLUME-MANTLE INTERACTIONS BENEATH KERGUELEN AND HEARD ISLANDS, INDIAN OCEAN ; NATURE 336 371-374
[69]	SUBBARAO K. V., RAMASUBBA REDDY G., HEKINIAN R., CHANDRASEKHARAM D. ; 1977; LARGE ION LITHOPHILE ELEMENTS AND SR AND PB ISOTOPIC VARIATION IN VOLCANIC ROCKS FROM THE INDIAN OCEAN| INDIAN OCEAN GEOLOGY AND BIOSTRATIGRAPHY (HEIRTZLER, J. R. ET AL. (EDS)), AGU, WASHINGTON DC 259-278
[70]	NICOLAYSEN, K., FREY, F. A., HODGES, K., WEIS, D. & GIRET, A. 2000; 40 AR/39 AR GEOCHRONOLOGY OF FLOOD BASALTS FROM THE KERGUELEN ARCHIPELAGO, SOUTHERN INDIAN OCEAN: IMPLICATIONS FOR CENOZOIC ERUPTION RATES OF THE KERGUELEN PLUME. EARTH AND PLANETARY SCIENCE LETTERS 174, 313-328 (2000).
[71]	WEIS D., FREY F. A. 1991; ISOTOPE GEOCHEMISTRY OF NINETYEAST RIDGE BASEMENT BASALTS: SR, ND AND PB EVIDENCE FOR INVOLVEMENT OF THE KERGUELEN HOTSPOT ; PROC. OCEAN DRILL. PROGRAM, SCIENT. RESULTS 121 591-610
[73]	WEIS D., FREY F. A., GIRET A., CANTAGREL J. M. ; 1998; GEOCHEMICAL CHARACTERISTICS OF THE YOUNGEST VOLCANO (MOUNT ROSS) IN THE KERGUELEN ARCHIPELAGO: INFERENCES FOR MAGMA FLUX, LITHOSPHERE ASSIMILATION AND COMPOSITION OF THE KERGUELEN PLUME ; J. PETROL. 39 973-994
[74]	WEIS D., FREY F. A., LEYRIT H., GAUTIER I. ; 1993; KERGUELEN ARCHIPELAGO REVISITED: GEOCHEMICAL AND ISOTOPIC STUDY OF THE SOUTHEAST PROVINCE LAVAS ; EARTH PLANET. SCI. LETT. 118 101-119
[75]	WEIS D., GIRET A. ; 1994; KERGUELEN PLUTONIC COMPLEXES: SR, ND, PB ISOTOPIC STUDY ND INTERFERENCES ABOUT THEIR SOURCES, AGE, AND GEODYNAMIC SETTING ; MEM. SOC.GEOL. FRANCE 166 47-59
[76]	WHITE W. M., HOFMANN A. W. ; 1982; SR AND ND ISOTOPE GEOCHEMISTRY OF OCEANIC BASALTS AND MANTLE EVOLUTION ; NATURE 296 821-825
[77]	WILLIAMS ROSS W., GILL J. B. ; 1992; TH ISOTOPE AND U-SERIES DISEQUILIBRIA IN SOME ALKALI BASALTS ; GEOPHYS. RES. LETT. 19 139-142
[78]	XU GUANGPING, FREY F. A., WEIS D., SCOATES J. S., GIRET A. ; 2007; FLOOD BASALTS FROM MT. CAPITOLE IN THE CENTRAL KERGUELEN ARCHIPELAGO: INSIGHTS INTO THE GROWTH OF THE ARCHIPELAGO AND SOURCE COMPONENTS CONTRIBUTING TO PLUME-RELATED VOLCANISM ; GEOCHEMISTRY GEOPHYSICS GEOSYSTEMS 8 2007
[79]	YANG HUAI-JEN, FREY F. A., WEIS D., GIRET A., PYLE D. G., MICHON G. ; 1998; PETROGENESIS OF THE FLOOD BASALTS FORMING THE NORTHERN KERGUELEN ARCHIPELAGO: IMPLICATIONS FOR THE KERGUELEN PLUME ; J. PETROL. 39 711-748
[80]	DUNCAN, R. A. IN PROCEEDINGS OF THE OCEAN DRILLING PROGRAM, SCIENTIFIC RESULTS, VOL. 121 (EDS J. WEISSEL, J. PEIRCE, & E. TAYLOR) 507-517 (OCEAN DRILLING PROGRAM, 1991).
[81]	DUNCAN, R. A. GEOCHRONOLOGY OF BASALTS FROM THE NINETYEAST RIDGE AND CONTINENTAL DISPERSION IN THE EASTERN INDIAN OCEAN. JOURNAL OF VOLCANOLOGY AND GEOTHERMAL RESEARCH 4, 283-305 (1978).
[82]	DOUCET, SONIA, WEIS, DOMINIQUE, SCOATES, JAMES S., NICOLAYSEN, KIRSTEN, FREY, FREDERICK A., GIRET, ANDRÉ ; 2002; THE DEPLETED MANTLE COMPONENT IN KERGUELEN ARCHIPELAGO BASALTS: PETROGENESIS OF THOLEIITIC–TRANSITIONAL BASALTS FROM THE LORANCHET PENINSULA. JOURNAL OF PETROLOGY 43, 1341-1366, DOI:10.1093/PETROLOGY/43.7.1341 (2002).
[83]	WEIS D., FREY F. A., GIRET A., CANTAGREL J. M. ; 1998; GEOCHEMICAL CHARACTERISTICS OF THE YOUNGEST VOLCANO (MOUNT ROSS) IN THE KERGUELEN ARCHIPELAGO: INFERENCES FOR MAGMA FLUX, LITHOSPHERE ASSIMILATION AND COMPOSITION OF THE KERGUELEN PLUME ; J. PETROL. 39 1998 973-994
[84]	WEIS, D. & FREY, F. A. 2002; SUBMARINE BASALTS OF THE NORTHERN KERGUELEN PLATEAU: INTERACTION BETWEEN THE KERGUELEN PLUME AND THE SOUTHEAST INDIAN RIDGE REVEALED AT ODP SITE 1140. JOURNAL OF PETROLOGY 43, 1287-1309, DOI:10.1093/PETROLOGY/43.7.1287 (2002).
[85]	ANDERSON, R N; SPARIOUS, J; WEISSEL, J K; HAYES, D E, 1980, THE INTERRELATION BETWEEN VARIATIONS IN MAGNETIC ANOMALY AMPLITUDES AND BASALTIC MAGNETIZATION AND CHEMISTRY ALONG THE SOUTHEAST INDIAN RIDGE, J GEOPHYS RES, 85, 3883 - 3898
[89]	CARLSON, R W, 1980, CRUST-MANTLE DIFFERENTIATION ON THE EARTH AND MOON: EVIDENCE FROM ISOTOPIC STUDIES FOR CONTRASTING MECHANISMS AND DURATION, THESIS OR DISSERTATION, DOCTORAL, UC SAN DIEGO
[94]	COHEN, R S; EVENSEN, N M; HAMILTON, P J; O'NIONS, R K, 1980, U-PB, SM-ND AND RB-SR SYSTEMATICS OF MID-OCEAN RIDGE BASALT GLASSES, NATURE, 283, 149 - 153
[95]	COHEN, R S; O'NIONS, R K, 1982, THE LEAD, NEODYMIUM AND STRONTIUM ISOTOPIC STRUCTURE OF OCEAN RIDGE BASALTS, J PETROL, 23, 299 - 324
[102]	DOSSO, L; BOUGAULT, H; BEUZART, P; CALVEZ, J Y; JORON, J-L, 1988, THE GEOCHEMICAL STRUCTURE OF THE SOUTH-EAST INDIAN RIDGE, EARTH PLANET SCI LETT, 88, 47 - 59
[103]	DUPRE, B; ALLEGRE, C J, 1983, PB-SR ISOTOPE VARIATION IN INDIAN OCEAN BASALTS AND MIXING PHENOMENA, NATURE, 303, 142 - 146
[111]	GALE, A; DALTON, C; LANGMUIR, C H; SU, Y; SCHILLING, J-G, 2013, THE MEAN COMPOSITION OF OCEAN RIDGE BASALTS, GEOCHEM GEOPHYS GEOSYST, 14, 489 - 513
[114]	HAMELIN, B; ALLEGRE, C J, 1985, LARGE-SCALE REGIONAL UNITS IN THE DEPLETED UPPER MANTLE REVEALED BY AN ISOTOPE STUDY OF THE SOUTH-WEST INDIAN RIDGE, NATURE, 315, 196 - 199
[116]	HANAN, B B; BLICHERT-TOFT, J; HEMOND, C; SAYIT, K; AGRANIER, A; GRAHAM, D W; ALBAREDE, F, 2013, Pb AND Hf ISOTOPE VARIATIONS ALONG THE SOUTHEAST INDIAN RIDGE AND THE DYNAMIC DISTRIBUTION OF MORB SOURCE DOMAINS IN THE UPPER MANTLE, EARTH PLANET SCI LETT, 375, 196 - 208
[117]	HANAN, B B; BLICHERT-TOFT, J; PYLE, D G; CHRISTIE, D M, 2004, CONTRASTING ORIGINS OF THE UPPER MANTLE REVEALED BY HAFNIUM AND LEAD ISOTOPES FROM THE SOUTHEAST INDIAN RIDGE, NATURE, 432, 91 - 94
[121]	JACKSON, M G; CARLSON, R W, 2012, HOMOGENEOUS SUPERCHONDRITIC 142Nd/144Nd IN THE MID-OCEAN RIDGE BASALT AND OCEAN ISLAND BASALT MANTLE, GEOCHEM GEOPHYS GEOSYST, 13, 1 - 10
[125]	KEMPTON, P D; PEARCE, J A; BARRY, T L; FITTON, J G; LANGMUIR, C H; CHRISTIE, D M, 2002, Sr-Nd-Pb-Hf ISOTOPE RESULTS FROM ODP LEG 187: EVIDENCE FOR MANTLE DYNAMICS OF THE AUSTRALIAN-ANTARCTIC DISCORDANCE AND ORIGIN OF THE INDIAN MORB SOURCE, GEOCHEM GEOPHYS GEOSYST, 3, 0
[126]	KLEIN, E M; LANGMUIR, C H; STAUDIGEL, H, 1991, GEOCHEMISTRY OF BASALTS FROM THE SOUTHEAST INDIAN RIDGE, 115 DEGREE E-138 DEGREE E, J GEOPHYS RES, 96, 2089 - 2107
[127]	KLEIN, E M; LANGMUIR, C H; ZINDLER, A; STAUDIGEL, H; HAMELIN, B, 1988, ISOTOPE EVIDENCE OF A MANTLE CONVECTION BOUNDARY AT THE AUSTRLIAN ANTARCTIC DISCORDANCE, NATURE, 333, 623 - 629
[128]	KROLIKOWSKA-CIAGLO, S; DEYHLE, A T; HAUFF, F; HOERNLE, K, 2007, BORON ISOTOPE GEOCHEMISTRY AND U-Pb SYSTEMATICS OF ALTERED MORB FROM THE AUSTRALIAN ANTARCTIC DISCORDANCE (ODP LEG 187), CHEMICAL GEOLOGY, 242, 455 - 469
[129]	KROLIKOWSKA-CIAGLO, S; HAUFF, F; HOERNLE, K, 2005, SR-ND ISOTOPE SYSTEMATICS IN 14-28 MA LOW-TEMPERATURE ALTERED MID-OCEAN RIDGE BASALT FROM THE AUSTRALIAN ANTARCTIC DISCORDANCE, OCEAN DRILLING PROGRAM LEG 187, GEOCHEM GEOPHYS GEOSYST, 6, 0
[139]	MAHONEY, J J; GRAHAM, D W; CHRISTIE, D M; JOHNSON, K T M; HALL, L S; VONDERHAAR, D L, 2002, BETWEEN A HOTSPOT AND A COLD SPOT: ISOTOPIC VARIATION IN THE SOUTHEAST INDIAN RIDGE ASTHENOSPHERE, 86 DEG E - 118 DEG E, J PETROL, 43, 1155 - 1176
[148]	MICHARD, A; MONTIGNY, R; SCHLICH, R, 1986, GEOCHEMISTRY OF THE MANTLE BENEATH THE RODRIGUEZ TRIPLE JUNCTION AND THE SOUTH-EAST INDIAN RIDGE, EARTH PLANET SCI LETT, 78, 104 - 111
[156]	PEDERSEN, R B; CHRISTIE, D M; PYLE, D G, 2004, REGIONAL AND LOCAL MANTLE HETEROGENEITIES ASSOCIATED WITH THE AUSTRALIAN ANTARCTIC DISCORDANCE: Sr AND Nd ISOTOPIC RESULTS FROM ODP LEG 187, PROC ODP, SCI RESULTS, 187, 1 - 23
[158]	PYLE, D G, 1994, GEOCHEMISTRY OF MID-OCEAN RIDGE BASALT WITHIN AND SURROUNDING THE AUSTRALIAN-ANTARCTIC DISCORDANCE, THESIS OR DISSERTATION, DOCTORAL, OREGON STATE UNIVERSITY; MONOGRAPHIC, 0, - 0
[159]	PYLE, D G; CHRISTIE, D M; MAHONEY, J J, 1992, RESOLVING AN ISOTOPIC BOUNDARY WITHIN THE AUSTRALIAN-ANTARCTIC DISCORDANCE, EARTH PLANET SCI LETT, 112, 161 - 178
[160]	PYLE, D G; CHRISTIE, D M; MAHONEY, J J; DUNCAN, R A, 1995, GEOCHEMISTRY AND GEOCHRONOLOGY OF ANCIENT SOUTHEAST INDIAN AND SOUTHWEST PACIFIC SEAFLOOR, J GEOPHYS RES, 100, 22261 - 22282
[163]	SALTERS, V J M, 1996, THE GENERATION OF MID-OCEAN RIDGE BASALTS FROM THE HF AND ND ISOTOPE PERSPECTIVE, EARTH PLANET SCI LETT, 141, 109 - 123
[168]	SUBBARAO, K V; HEDGE, C E, 1973, K, RB, SR AND 87SR/86SR IN ROCKS FROM MID-INDIAN OCEAN RIDGE, EARTH PLANET SCI LETT, 18, 223
[169]	SUBBARAO, K V; HEKINIAN, R; CHANDRESEKHARAM, D, 1977, LARGE ION LITHOPHILE ELEMENTS AND SR AND PB ISOTOPIC VARIATIONS IN VOLCANIC ROCKS FROM THE INDIAN OCEAN, In: INDIAN OCEAN GEOLOGY AND BIOSTRATIGRAPHY; STUDIES FOLLOWING DEE-SEA DRILLING LEGS 22-29, HEIRTZLER-J-R, BOLLI-H-M, DAVIES-T-A, SAUNDERS-J-B, SCLATER-J-G, 259 - 278
[170]	SUBBARAO, K V; REDDY, V V, 1981, GEOCHEMICAL STUDIES ON OCEANIC BASALTS FROM THE INDIAN OCEAN, In: EVOLUTION OF THE UPPER MANTLE, ZARTMAN-R-E, TAYLOR-S-R, 69 - 89
[176]	LIU, ZHENG; ZHOU, QING; LAI, YANG; QING, CHENGSHI; LI, YINGXU; WU, JIANYANG; XIA, XIANGBIAO, PETROGENESIS OF THE EARLY CRETACEOUS LAGUILA BIMODAL INTRUSIVE ROCKS FROM THE TETHYAN HIMALAYA: IMPLICATIONS FOR THE BREAK-UP OF EASTERN GONDWANA. LITHOS 236–237, 190-202, DOI:HTTP://DX.DOI.ORG/10.1016/J.LITHOS.2015.09.006 (2015).
[177]	GHATAK, A., AND BASU, A. R., 2013, ISOTOPIC AND TRACE ELEMENT GEOCHEMISTRY OF ALKALIC–MAFIC–ULTRAMAFIC–CARBONATITIC COMPLEXES AND FLOOD BASALTS IN NE INDIA: ORIGIN IN A HETEROGENEOUS KERGUELEN PLUME: GEOCHIMICA ET COSMOCHIMICA ACTA, V. 115, P. 46-72.
[178]	ZHOU, Q., LIU, Z., LAI, Y., WANG, G.-C., LIAO, Z., LI, Y.-X., WU, J.-Y., WANG, S., AND QING, C.-S., 2017, PETROGENESIS OF MAFIC AND FELSIC ROCKS FROM THE COMEI LARGE IGNEOUS PROVINCE, SOUTH TIBET: IMPLICATIONS FOR THE INITIAL ACTIVITY OF THE KERGUELEN PLUME: GEOLOGICAL SOCIETY OF AMERICA BULLETIN, V. 130, NO. 5-6, P. 811-824.
[179]	WANG, Y., ZENG, L., ASIMOW, P. D., GAO, L.-E., MA, C., ANTOSHECHKINA, P. M., GUO, C., HOU, K., AND TANG, S., 2018, EARLY CRETACEOUS HIGH-TI AND LOW-TI MAFIC MAGMATISM IN SOUTHEASTERN TIBET: INSIGHTS INTO MAGMATIC EVOLUTION OF THE COMEI LARGE IGNEOUS PROVINCE: LITHOS, V. 296-299, P. 396-411.
[180]	WANG, Y. Y., GAO, L. E., ZENG, L. S., CHEN, F. K., HOU, K. J., WANG, Q., ZHAO, L. H., AND GAO, J. H., 2016, MULTIPLE PHASES OF CRETACEOUS MAFIC MAGMATISM IN THE GYANGZE-KANGMA AREA, TETHYAN HIMALAYA, SOUTHERN TIBE: ACTA PETROLOGICA SINICA, V. 32, P. 3572-3596.
[181]	XIA, Y., ZHU, D. C., WANG, Q., ZHAO, Z. D., LIU, D., WANG, L. Q., AND MO, X. X., 2014, PICRITIC PORPHYRITES AND ASSOCIATED BASALTS FROM THE REMNANT COMEI LARGE IGNEOUS PROVINCE IN SE TIBET: RECORDS OF MANTLE‐PLUME ACTIVITY: TERRA NOVA, V. 26, NO. 6, P. 487-494.
[182]	MA, L., KERR, A. C., WANG, Q., JIANG, Z.-Q., AND HU, W.-L., 2018, EARLY CRETACEOUS (~140MA) ALUMINOUS A-TYPE GRANITES IN THE TETHYAN HIMALAYA, TIBET: PRODUCTS OF CRUST-MANTLE INTERACTION DURING LITHOSPHERIC EXTENSION: LITHOS, V. 300-301, P. 212-226.
[183]	QIU, B., ZHU, D., ZHAO, Z., AND WANG, L., 2010, THE WESTWARD EXTENSION OF COMEI FRAGMENTED LARGE IGNEOUS PROVINCE IN SOUTHERN TIBET AND ITS IMPLICATIONS: ACTA PETROLOGICA SINICA, V. 26, NO. 7, P. 2207-2216.
[184]	CHEN, S.-S., FAN, W.-M., SHI, R.-D., LIU, X.-H., AND ZHOU, X.-J., 2018, 118–115 MA MAGMATISM IN THE TETHYAN HIMALAYA IGNEOUS PROVINCE: CONSTRAINTS ON EARLY CRETACEOUS RIFTING OF THE NORTHERN MARGIN OF GREATER INDIA: EARTH AND PLANETARY SCIENCE LETTERS, V. 491, P. 21-33.
[185]	OLIEROOK, H. K. H., MERLE, R. E., AND JOURDAN, F., 2017, TOWARD A GREATER KERGUELEN LARGE IGNEOUS PROVINCE: EVOLVING MANTLE SOURCE CONTRIBUTIONS IN AND AROUND THE INDIAN OCEAN: LITHOS, V. 282–283, P. 163-172.
[186]	DIREEN, N., COHEN, B. E., MAAS, R., FREY, F. A., WHITTAKER, J. M., COFFIN, M. F., MEFFRE, S., HALPIN, J. A., AND CRAWFORD, A. J., 2017, NATURALISTE PLATEAU: CONSTRAINTS ON THE TIMING AND EVOLUTION OF THE KERGUELEN LARGE IGNEOUS PROVINCE AND ITS ROLE IN GONDWANA BREAKUP: AUSTRALIAN JOURNAL OF EARTH SCIENCES, V. 64, NO. 7, P. 851-869.

## Sheet: G47850
Jiang, Q., et al., 2020, Longest continuously erupting large igneous province driven by plume-ridge interaction: Geology, v. 49, https://doi.org/10.1130/G47850.1
